# Supplementary material for: Age Distribution of All-Cause Mortality Among Children Younger Than 5 Years in Low- and Middle-Income Countries
Source: PubMed Central journal article supplement (PMC9121187; doi:10.1001/jamanetworkopen.2022.12692), 2022-05-19
Supplement: jamanetwopen-e2212692-s001.pdf [file jamanetwopen-e2212692-s001.pdf]

## Supplementary Online Content

Karlsson O, Kim R, Hasman A, Subramanian SV. Age distribution of all-cause mortality among children younger than 5 years in low- and middle-income countries. *JAMA Netw Open.* 2022;5(5):e2212692. doi:10.1001/jamanetworkopen.2022.12692

**eMethods 1.** Constructing Mortality Measures

**eMethods 2.** Measure for Household Living Standards

**eTable 1.** Information on Data

**eTable 2.** Mortality and the Share of Deaths Among Children Younger Than 5 Years by Age: Period Restricted to 5 Years Before Survey Instead of 10 Years

**eTable 3.** Share of Deaths Among Children Younger Than 5 Years Occurring at Different Ages Using Detailed Age Intervals: Period Restricted to 5 Years Before Survey Instead of 10 Years

**eTable 4.** Component Mortality Probabilities for Pooled Sample

**eTable 5.** Mortality and the Share of Deaths Among Children Younger Than 5 Years by Age

**eTable 6.** Share of Deaths Among Children Younger Than 5 Years Occurring at Different Ages Using Detailed Age Intervals

**eTable 7.** Mortality (Deaths per 1000) at Different Ages by Living Standards

**eTable 8.** Shares of Deaths Among Children Younger Than 5 Years Occurring at Different Ages by Living Standards

**eTable 9.** Mortality (Deaths per 1000) at Different Ages by Sex

**eTable 10.** Shares of Deaths Among Children Younger Than 5 Years Occurring at Different Ages by Sex

**eFigure 1.** Mortality Rate Among Children Younger Than 5 Years and Share of These Deaths Occurring at Different Ages: Pooled, Least Developed Countries, Regions, and World Bank Income Groups: Period Restricted to 5 Years Before Survey Instead of 10 Years

**eFigure 2.** Share of Deaths Among Children Younger Than 5 Years Occurring at Different Ages Using Detailed Age Intervals: Pooled, Least Developed Countries, Regions, and World Bank Income Groups: Period Restricted to 5 Years Before Survey Instead of 10 Years

**eFigure 3.** Mortality Rate Among Children Younger Than 5 Years and Share of These Deaths Occurring at Different Ages by Country: Period Restricted to 5 Years Before Survey Instead of 10 Years

**eFigure 4.** Share of Deaths Among Children Younger Than 5 Years Occurring at Different Ages Using Detailed Age Intervals by Countries: Period Restricted to 5 Years Before Survey Instead of 10 Years

**eFigure 5.** Lexis Diagram Demonstrating Inclusion for Each Component Mortality Probability

**eFigure 6.** Country-Level Association Between Mortality Rate Among Children Younger Than 5 Years and Share of These Deaths Occurring at Different Ages  
**eFigure 7.** Share of Deaths Among Children Younger Than 5 Years Occurring at Different Ages Using Detailed Age Intervals by Countries  
**eFigure 8.** Share of Deaths Among Children Younger Than 5 Years Occurring at Different Ages: Countries by Living Standards  
**eFigure 9.** Share of Deaths Among Children Younger Than 5 Years Occurring at Different Ages: Countries by Sex  
**eReferences**

This supplementary material has been provided by the authors to give readers additional information about their work.

## eMethods 1. Constructing Mortality Measures

In the surveys, age at death was usually recorded in days, months, or years for children that died at 24 months or older. Therefore, we used age at death in months, as imputed in the DHS and MICS, where ages reported in days were converted to months, ages reported in months were used directly, and ages reported in years were truncated to months (ie, three years as 36 months). Missing age at death was imputed using a quasi-random "hot deck" method, based on the age at death for the closest preceding observation in the data with the same birth interval and, if available, the same form of reporting for age at death (ie, days, months, or years). Date of birth was randomly imputed after imposing certain logical ranges (eg, based on other dates, birth intervals, and maternal age at birth, duration of amenorrhea, and abstinence) and constraints (eg, age or age at death) [1].

We used a direct method for calculating mortality rates. Direct methods are preferable to indirect methods, which only use information on births and deaths for cohorts of mothers as opposed to data on date of birth and age at death of deceased children. Indirect methods rely on a broader set of assumptions than direct methods, such as stable fertility levels and patterns, no change or linear change in mortality, and a pattern of mortality derived from other populations, often European. We followed the United Nations Population Division's recommendation for calculation and presentation of mortality rates to facilitate comparison to other sources [2]. Mortality rates were estimated using the same approach used in reports from the DHS and MICS: a synthetic cohort life table approach [3–6]. (Note that under-5 mortality rates in the DHS reports may differ since we restricted the period to ten years before a survey while the DHS usually limits it to five years for national-level estimates.)

A synthetic cohort life table was constructed and component mortality probabilities for small age intervals estimated, which were then combined to calculate a mortality probability for the age group of interest. (As such, it is similar to a product limit estimator.) This approach differs from a vital statistics approach, where deaths over a period are divided by births over the same period, in that the vital statistics approach produces true rates, rather than probabilities, and the variation in the number of births over time is not accounted for. The synthetic cohort life table approach also differs from a true life table approach, where the number of deaths in a specific birth cohort is divided by the number of deaths in that specific birth cohort, so all children must have lived through the risk period, which in this study would mean that only children born more than five years before each survey would be included. The synthetic cohort life table approach allows the use of most recent births and is also specific to a period (ie, the ten years preceding the survey in our study).

First, component mortality probabilities were constructed for the age intervals less than one month, 1–2 months, 3–5 months, 6–11 months, 12–23 months, 24–35 months, 36–47 months, and 48–59 months. (Note that here we use *age groups* to refer to the broader age groups which are of primary interest—under-5, under-2, and neonatal—and *age interval* to refer to the age segments used to calculate the component mortality probabilities, which are then used for estimating mortality rates for the broader age groups.) eFigure 5 shows a Lexis diagram which illustrates the three cohorts of children included in the component mortality probability for a specific age interval and period: the y-axis shows an age interval for a specific component mortality probability which ranges from  $a_1$  to  $a_2$  (0 to < 1 month, 1–2 months, 3–5 months, etc.) and the x-axis shows the period for which the component mortality probability is being calculated, ranging from  $t_1$  (120 months before the survey in our study) to  $t_2$  (one month before the survey).  $t_1$  and  $t_2$  can vary, but in this study, we use a single period. The component mortality probability for the specific age interval includes three cohorts of children: B, who are exposed to the entire period, reaching the (hypothetical) ages  $a_1$  and  $a_2$  within the period  $t_1$  to  $t_2$  (ie, born between  $t_1 - a_1$  and  $t_2 - a_2$ ); A who reach age  $a_1$  before the period starts at  $t_1$  and age  $a_2$  before the period ends at  $t_2$  (ie, born between  $t_1 - a_2$  and  $t_1 - a_1$ ); and C who reach age  $a_1$  after the period starts at  $t_1$  but do not reach age  $a_2$  before the period ends at  $t_2$  (ie, born between  $t_2 - a_2$  and  $t_2 - a_1$ ).

It was assumed that half of the exposures occurred in the relevant age interval for only partially exposed children in cohorts A and C and half the deaths for partially exposed children in cohort A. Note that all deaths of children in the relevant age interval for children in cohort C were included in this study since the end of the period  $t_2$  was the date of the interview and those deaths must have occurred before the interview. The events occurring in the month of the interview were excluded since they did not contribute an entire month of deaths and exposures. The component probability  $q_i$  for each age interval  $i$  was then calculated as:

$$q_i = \frac{0.5 \times Ad_i + Bd_i + Cd_i}{0.5 \times Ac_i + Bc_i + 0.5 \times Cc_i} \quad \text{Eq.1}$$

or half the deaths of children in cohort A ( $Ad$ ) and all deaths in cohorts B ( $Bd$ ) and C ( $Cd$ ) occurring in age interval  $i$  divided by half the cases in cohorts A ( $Ac$ ) and C ( $Cc$ ) and all cases in cohort B ( $Bc$ ) exposed to age interval  $i$ . These component mortality probabilities were converted to survival probabilities by subtracting them from one ( $1 - q_i$ ).

$${}_nq_x = 1 - \prod_{i=n}^{i=x+n} (1 - q_i) \quad \text{Eq.2}$$

The mortality rates ( ${}_nq_x \times 1000$ ) for the age groups ( $n$  to  $x$ )—ages 0 to < 1 month, 0 to 23, and 0 to 59—were calculated by subtracting the product of the component probabilities across the relevant age group from one [6].

eTable 4 demonstrates the synthetic cohort life table for our pooled sample. Each component (mortality) probability in the second last column was obtained by dividing half the deaths of children in cohort A and all deaths in cohorts B and C by half the cases in cohorts A and C and all cases in cohort B (as in Eq.1). The under-5 mortality rate was obtained by multiplying together all rows in the last column and further multiplying by 1000 (as in Eq.2). The under-2 mortality rate was obtained by multiplying the first five rows of the last column together and further multiplying by 1000. The neonatal mortality rate was  $q_0 \times 1000$  for the first age interval shown in the first row second last column.

Mortality for children 1–23 months old was calculated by subtracting the neonatal mortality rate from mortality rate of children aged 0–23 months old (as neonatal mortality rate is subtracted from the infant mortality rate to construct postneonatal mortality rate in the reports from the DHS [5,6]). Similarly, mortality for children 24–59 months old was calculated by subtracting the mortality rate for children 0–23 months old from the under-5 mortality rate. Therefore, the mortality measures for neonates, children 1–23 months old, and children 24–59 months old, sum up to the under-5 mortality rate. The share measures were then calculated by dividing the mortality measures for mortality at 0–23 months, <1 month, 1–23 months, and 24–59 months by the under-5 mortality rate and multiplying by 100 to obtain percentages of under-5 deaths occurring in each age group.

## **eMethods 2.** Measure for Household Living Standards

A household wealth index was constructed (by the DHS and MICS) using information on the household's ownership of assets (eg, car, television, refrigerator) and amenities (eg, type of toilet facility, electricity access, source of water) using principal component analysis [7]. Households were divided into five equally sized groups, each containing 20% of households (quintiles), based on the household wealth index. We show results comparing the top quintile (20% of households with the best living standards) to the bottom quintile (20% of households with the worst living standards) within each country.

**eTable 1. Information on Data**

| Country             | Survey year | Observations | Number of births ('000) | LDC | UNICEF-Region              | Income group | Data |
|---------------------|-------------|--------------|-------------------------|-----|----------------------------|--------------|------|
| Pooled              |             | 2,827,515    | 878,562                 |     |                            |              |      |
| Afghanistan         | 2015        | 90,971       | 11,727                  | Yes | South Asia                 | LIC          | DHS  |
| Albania             | 2017-2018   | 9,131        | 357                     |     | Europe & Central Asia      | UMIC         | DHS  |
| Angola              | 2015-2016   | 32,544       | 10,666                  | Yes | Eastern & Southern Africa  | LMIC         | DHS  |
| Armenia             | 2015-2016   | 5,103        | 440                     |     | Europe & Central Asia      | UMIC         | DHS  |
| Bangladesh          | 2019        | 73,146       | 30,241                  | Yes | South Asia                 | LMIC         | MICS |
| Benin               | 2017-2018   | 33,565       | 3,758                   | Yes | West & Central Africa      | LMIC         | DHS  |
| Burkina Faso        | 2010        | 39,950       | 6,028                   | Yes | West & Central Africa      | LIC          | DHS  |
| Burundi             | 2016-2017   | 34,295       | 3,804                   | Yes | Eastern & Southern Africa  | LIC          | DHS  |
| Cambodia            | 2014        | 20,962       | 3,610                   | Yes | East Asia & Pacific        | LMIC         | DHS  |
| Cameroon            | 2018-2019   | 24,613       | 8,372                   |     | West & Central Africa      | LMIC         | DHS  |
| Chad                | 2014-2015   | 51,289       | 5,463                   | Yes | West & Central Africa      | LIC          | DHS  |
| Colombia            | 2015-2016   | 36,494       | 7,637                   |     | Latin America & Caribbean  | UMIC         | DHS  |
| Comoros             | 2012        | 8,281        | 231                     | Yes | Eastern & Southern Africa  | LMIC         | DHS  |
| Congo               | 2011-2012   | 22,680       | 1,432                   |     | West & Central Africa      | LMIC         | DHS  |
| Congo (DR)          | 2013-2014   | 44,608       | 27,504                  | Yes | West & Central Africa      | LIC          | DHS  |
| Cote d'Ivoire       | 2016        | 23,660       | 7,889                   |     | West & Central Africa      | LMIC         | MICS |
| Dominican Rep.      | 2014        | 40,182       | 2,077                   |     | Latin America & Caribbean  | UMIC         | MICS |
| Egypt               | 2014        | 40,620       | 21,948                  |     | Middle East & North Africa | LMIC         | DHS  |
| El Salvador         | 2014        | 15,865       | 1,239                   |     | Latin America & Caribbean  | LMIC         | MICS |
| Ethiopia            | 2016        | 29,854       | 32,116                  | Yes | Eastern & Southern Africa  | LIC          | DHS  |
| Gabon               | 2012        | 15,291       | 496                     |     | West & Central Africa      | UMIC         | DHS  |
| Gambia              | 2018        | 26,996       | 791                     | Yes | West & Central Africa      | LIC          | MICS |
| Ghana               | 2014        | 15,832       | 7,888                   |     | West & Central Africa      | LMIC         | DHS  |
| Guatemala           | 2014-2015   | 35,185       | 4,084                   |     | Latin America & Caribbean  | UMIC         | DHS  |
| Guinea              | 2018        | 20,966       | 4,224                   | Yes | West & Central Africa      | LIC          | DHS  |
| Guyana              | 2014        | 7,424        | 162                     |     | Latin America & Caribbean  | UMIC         | MICS |
| Haiti               | 2016-2017   | 18,293       | 2,743                   | Yes | Latin America & Caribbean  | LIC          | DHS  |
| Honduras            | 2011-2012   | 31,415       | 2,153                   |     | Latin America & Caribbean  | LMIC         | DHS  |
| India               | 2015-2016   | 798,690      | 260,232                 |     | South Asia                 | LMIC         | DHS  |
| Indonesia           | 2017        | 53,671       | 49,778                  |     | East Asia & Pacific        | UMIC         | DHS  |
| Iraq                | 2018        | 51,289       | 10,582                  |     | Middle East & North Africa | UMIC         | MICS |
| Jordan              | 2017-2018   | 31,781       | 2,118                   |     | Middle East & North Africa | UMIC         | DHS  |
| Kenya               | 2014        | 59,861       | 14,551                  |     | Eastern & Southern Africa  | LMIC         | DHS  |
| Kyrgyz Rep.         | 2018        | 8,783        | 1,529                   |     | Europe & Central Asia      | LMIC         | MICS |
| Lao                 | 2017        | 34,275       | 1,672                   | Yes | East Asia & Pacific        | LMIC         | MICS |
| Lesotho             | 2018        | 7,583        | 577                     | Yes | Eastern & Southern Africa  | LMIC         | MICS |
| Liberia             | 2013        | 20,692       | 1,386                   | Yes | West & Central Africa      | LIC          | DHS  |
| Madagascar          | 2018        | 32,998       | 7,871                   | Yes | Eastern & Southern Africa  | LIC          | MICS |
| Malawi              | 2015-2016   | 48,309       | 5,836                   | Yes | Eastern & Southern Africa  | LIC          | DHS  |
| Maldives            | 2016-2017   | 8,543        | 72                      |     | South Asia                 | UMIC         | DHS  |
| Mali                | 2018        | 25,363       | 7,325                   | Yes | West & Central Africa      | LIC          | DHS  |
| Mauritania          | 2015        | 28,187       | 1,279                   | Yes | West & Central Africa      | LMIC         | MICS |
| Moldova             | 2012        | 4,414        | 443                     |     | Europe & Central Asia      | LMIC         | MICS |
| Mongolia            | 2018        | 15,381       | 721                     |     | East Asia & Pacific        | LMIC         | MICS |
| Mozambique          | 2011        | 27,381       | 9,000                   | Yes | Eastern & Southern Africa  | LIC          | DHS  |
| Myanmar             | 2015-2016   | 14,719       | 10,090                  | Yes | East Asia & Pacific        | LMIC         | DHS  |
| Namibia             | 2013        | 12,741       | 617                     |     | Eastern & Southern Africa  | UMIC         | DHS  |
| Nepal               | 2019        | 17,862       | 5,823                   | Yes | South Asia                 | LMIC         | MICS |
| Niger               | 2012        | 33,401       | 7,572                   | Yes | West & Central Africa      | LIC          | DHS  |
| Nigeria             | 2018        | 89,319       | 69,010                  |     | West & Central Africa      | LMIC         | DHS  |
| Pakistan            | 2017-2018   | 35,704       | 55,669                  |     | South Asia                 | LMIC         | DHS  |
| Papua New Guinea    | 2016-2018   | 25,363       | 2,205                   |     | East Asia & Pacific        | LMIC         | DHS  |
| Paraguay            | 2016        | 9,782        | 1,410                   |     | Latin America & Caribbean  | UMIC         | MICS |
| Peru                | 2012        | 28,366       | 6,092                   |     | Latin America & Caribbean  | UMIC         | DHS  |
| Philippines         | 2017        | 31,648       | 23,164                  |     | East Asia & Pacific        | LMIC         | DHS  |
| Rwanda              | 2014-2015   | 21,899       | 3,443                   | Yes | Eastern & Southern Africa  | LIC          | DHS  |
| Sao Tome & Principe | 2014        | 5,304        | 64                      | Yes | West & Central Africa      | LMIC         | MICS |
| Senegal             | 2019        | 16,357       | 5,200                   | Yes | West & Central Africa      | LMIC         | DHS  |
| Sierra Leone        | 2019        | 27,532       | 2,510                   | Yes | West & Central Africa      | LIC          | DHS  |
| South Africa        | 2016        | 9,534        | 11,886                  |     | Eastern & Southern Africa  | UMIC         | DHS  |
| South Sudan         | 2010        | 24,384       | 3,104                   | Yes | Eastern & Southern Africa  | LIC          | MICS |
| State of Palestine  | 2014        | 21,342       | 1,335                   |     | Middle East & North Africa | LMIC         | MICS |
| Sudan               | 2014        | 40,049       | 12,168                  | Yes | Eastern & Southern Africa  | LIC          | MICS |
| Suriname            | 2018        | 9,537        | 108                     |     | Latin America & Caribbean  | UMIC         | MICS |
| Swaziland           | 2014        | 6,476        | 324                     |     | Eastern & Southern Africa  | LMIC         | MICS |
| Tajikistan          | 2017        | 15,078       | 2,507                   |     | Europe & Central Asia      | LIC          | DHS  |
| Tanzania            | 2015-2016   | 25,929       | 17,879                  | Yes | Eastern & Southern Africa  | LMIC         | DHS  |
| Timor-Leste         | 2016        | 20,945       | 343                     | Yes | East Asia & Pacific        | LMIC         | DHS  |
| Togo                | 2017        | 13,383       | 2,444                   | Yes | West & Central Africa      | LIC          | MICS |
| Tonga               | 2019        | 3,899        | 26                      |     | East Asia & Pacific        | UMIC         | MICS |
| Tunisia             | 2018        | 10,215       | 2,002                   |     | Middle East & North Africa | LMIC         | MICS |
| Turkey              | 2013        | 10,957       | 13,146                  |     | Europe & Central Asia      | UMIC         | DHS  |
| Turkmenistan        | 2019        | 9,964        | 1,390                   |     | Europe & Central Asia      | UMIC         | MICS |
| Uganda              | 2016        | 40,628       | 14,731                  | Yes | Eastern & Southern Africa  | LIC          | DHS  |
| Yemen               | 2013        | 45,923       | 7,748                   | Yes | Middle East & North Africa | LIC          | DHS  |
| Zambia              | 2018-2019   | 27,019       | 5,879                   | Yes | Eastern & Southern Africa  | LMIC         | DHS  |

|          |      |        |       |  |                           |      |      |
|----------|------|--------|-------|--|---------------------------|------|------|
| Zimbabwe | 2019 | 15,840 | 4,621 |  | Eastern & Southern Africa | LMIC | MICS |
|----------|------|--------|-------|--|---------------------------|------|------|

Notes: Observations refer to children that were under five years old at any point during the 120 months before each survey (excluding children born in the month of survey). The Population Division of the United Nations provides data on the number of births for five-year periods: two five-year periods are summed and interpolated to a yearly series and then linked to the survey year in each country and used to rescale the sampling weights. Acronyms and abbreviations: Republic (Rep.), Democratic Republic (DR), Low-Income Countries (LIC), Lower-Middle-Income Countries (LMIC), Upper-Middle-Income Countries (UMIC)

**eTable 2. Mortality and the Share of Deaths Among Children Younger Than 5 Years by Age: Period Restricted to 5 Years Before Survey Instead of 10 Years**

|                           | Mortality (deaths per 1000) |             |             |             |              | Share (%)   |             |             |              |
|---------------------------|-----------------------------|-------------|-------------|-------------|--------------|-------------|-------------|-------------|--------------|
|                           | 0–59 months                 | 0–23 months | Neonates    | 1–23 months | 24–59 months | 0–23 months | Neonates    | 1–23 months | 24–59 months |
| Pooled                    | 62.6                        | 50.6        | 27.1        | 23.5        | 12.0         | 80.9        | 43.3        | 37.6        | 19.1         |
|                           | [61.3,63.9]                 | [49.6,51.7] | [26.4,27.8] | [22.8,24.2] | [11.4,12.5]  | [80.3,81.5] | [42.4,44.2] | [36.8,38.5] | [18.5,19.7]  |
| Least Developed Countries | 73.2                        | 57.3        | 26.9        | 30.4        | 15.9         | 78.3        | 36.8        | 41.5        | 21.7         |
|                           | [71.3,75.2]                 | [55.8,59.0] | [26.0,27.9] | [29.3,31.6] | [15.2,16.6]  | [77.6,79.1] | [35.7,37.9] | [40.6,42.5] | [20.9,22.4]  |
| East Asia & Pacific       | 33.2                        | 28.7        | 16.2        | 12.5        | 4.5          | 86.4        | 48.7        | 37.7        | 13.6         |
|                           | [31.1,35.5]                 | [26.7,30.8] | [14.8,17.7] | [11.1,14.1] | [3.7,5.5]    | [83.7,88.6] | [45.3,52.2] | [34.2,41.2] | [11.4,16.3]  |
| Cambodia                  | 34.7                        | 30.4        | 17.8        | 12.6        | 4.3          | 87.6        | 51.3        | 36.4        | 12.4         |
|                           | [28.1,42.9]                 | [24.3,38.1] | [13.1,24.2] | [9.7,16.5]  | [3.1,6.0]    | [83.4,90.9] | [43.0,59.5] | [29.0,44.4] | [9.1,16.6]   |
| Indonesia                 | 31.6                        | 27.5        | 15.5        | 12.0        | 4.2          | 86.8        | 48.9        | 37.9        | 13.2         |
|                           | [28.8,34.7]                 | [25.0,30.1] | [13.9,17.2] | [10.2,14.1] | [3.0,5.9]    | [82.2,90.4] | [44.4,53.4] | [33.5,42.6] | [9.6,17.8]   |
| Lao                       | 45.5                        | 41.5        | 17.8        | 23.6        | 4.1          | 91.0        | 39.1        | 51.9        | 9.0          |
|                           | [40.3,51.4]                 | [36.4,47.2] | [14.9,21.3] | [20.1,27.7] | [3.0,5.5]    | [88.0,93.3] | [34.2,44.3] | [46.7,57.0] | [6.7,12.0]   |
| Mongolia                  | 19.3                        | 16.3        | 8.7         | 7.6         | 3.0          | 84.6        | 45.2        | 39.3        | 15.4         |
|                           | [14.6,25.4]                 | [11.9,22.4] | [5.8,13.1]  | [5.0,11.6]  | [1.6,5.6]    | [72.6,91.9] | [33.0,58.1] | [28.7,51.2] | [8.1,27.4]   |
| Myanmar                   | 50.0                        | 43.3        | 24.5        | 18.8        | 6.7          | 86.6        | 49.1        | 37.5        | 13.4         |
|                           | [42.5,58.7]                 | [36.3,51.5] | [19.7,30.6] | [13.4,26.3] | [4.3,10.3]   | [80.1,91.3] | [39.2,59.1] | [28.9,47.1] | [8.7,19.9]   |
| Papua New Guinea          | 48.5                        | 37.6        | 20.4        | 17.2        | 10.9         | 77.5        | 42.0        | 35.5        | 22.5         |
|                           | [43.8,53.8]                 | [33.4,42.4] | [17.1,24.3] | [13.9,21.4] | [8.3,14.4]   | [71.6,82.5] | [35.3,49.1] | [29.6,41.9] | [17.5,28.4]  |
| Philippines               | 27.3                        | 23.5        | 13.6        | 9.8         | 3.8          | 86.0        | 49.9        | 36.0        | 14.0         |
|                           | [23.3,32.0]                 | [19.8,27.8] | [10.6,17.5] | [7.4,13.0]  | [2.6,5.6]    | [80.5,90.0] | [40.8,59.1] | [28.2,44.7] | [10.0,19.5]  |
| Timor-Leste               | 41.4                        | 33.0        | 18.5        | 14.5        | 8.4          | 79.7        | 44.7        | 34.9        | 20.3         |
|                           | [36.0,47.5]                 | [28.9,37.6] | [15.3,22.4] | [11.5,18.2] | [5.9,12.0]   | [73.3,84.9] | [37.7,52.0] | [28.4,42.1] | [15.1,26.7]  |
| Tonga                     | 16.4                        | 15.0        | 7.1         | 7.8         | 1.5          | 91.1        | 43.3        | 47.8        | 8.9          |
|                           | [9.7,27.7]                  | [8.4,26.4]  | [4.3,11.9]  | [3.3,18.7]  | [0.4,5.3]    | [68.2,98.0] | [25.8,62.7] | [25.3,71.1] | [2.0,31.8]   |
| South Asia                | 52.2                        | 46.8        | 30.4        | 24.5        | 5.4          | 89.7        | 58.3        | 31.4        | 10.3         |
|                           | [50.6,53.9]                 | [45.2,48.5] | [29.2,31.8] | [15.6,17.1] | [5.1,5.7]    | [89.0,90.3] | [56.9,59.7] | [30.3,32.5] | [9.7,11.0]   |
| Afghanistan               | 55.2                        | 49.4        | 22.2        | 27.2        | 5.8          | 89.5        | 40.2        | 49.3        | 10.5         |
|                           | [49.4,61.5]                 | [43.9,55.4] | [18.8,26.2] | [23.6,31.3] | [4.8,7.0]    | [87.4,91.3] | [35.9,44.7] | [44.7,53.9] | [8.7,12.6]   |
| Bangladesh                | 39.6                        | 35.6        | 25.9        | 9.6         | 4.0          | 89.9        | 65.5        | 24.4        | 10.1         |
|                           | [37.0,42.3]                 | [33.0,38.3] | [23.9,28.1] | [8.2,11.4]  | [3.2,5.1]    | [87.2,92.1] | [61.6,69.3] | [21.2,27.9] | [7.9,12.8]   |
| India                     | 49.7                        | 44.3        | 29.5        | 14.8        | 5.4          | 89.1        | 59.2        | 29.8        | 10.9         |
|                           | [48.7,50.8]                 | [43.4,45.2] | [28.5,30.4] | [14.2,15.5] | [5.1,5.8]    | [88.4,89.7] | [57.9,60.6] | [28.7,31.0] | [10.3,11.6]  |
| Maldives                  | 20.4                        | 18.6        | 11.4        | 7.2         | 1.8          | 91.0        | 55.8        | 35.2        | 9.0          |
|                           | [14.0,29.7]                 | [12.4,27.7] | [6.8,19.0]  | [3.3,15.7]  | [0.9,3.7]    | [82.7,95.5] | [34.2,75.4] | [17.6,58.0] | [4.5,17.3]   |
| Nepal                     | 28.4                        | 25.5        | 15.9        | 9.6         | 3.0          | 89.6        | 55.9        | 33.8        | 10.4         |
|                           | [22.7,35.5]                 | [20.0,32.4] | [12.1,20.9] | [6.9,13.3]  | [1.9,4.5]    | [84.1,93.4] | [48.2,63.3] | [26.5,41.9] | [6.6,15.9]   |
| Pakistan                  | 70.7                        | 64.7        | 39.9        | 24.7        | 6.0          | 91.5        | 56.5        | 35.0        | 8.5          |
|                           | [63.2,79.0]                 | [57.7,72.4] | [34.7,46.0] | [20.6,29.7] | [4.5,8.1]    | [88.8,93.6] | [51.3,61.5] | [30.2,40.1] | [6.4,11.2]   |
| Europe & Central Asia     | 19.5                        | 17.8        | 9.8         | 8.0         | 1.7          | 91.5        | 50.5        | 41.1        | 8.5          |
|                           | [16.1,23.5]                 | [14.7,21.6] | [7.7,12.5]  | [6.3,10.2]  | [1.1,2.5]    | [87.4,94.4] | [43.7,57.2] | [34.5,47.9] | [5.6,12.6]   |
| Albania                   | 4.5                         | 4.5         | 1.7         | 2.8         | NA           | NA          | 37.3        | 62.7        | NA           |
|                           | [2.0,10.1]                  | [2.0,10.1]  | [0.5,6.3]   | [0.9,8.9]   |              |             | [5.6,85.6]  | [14.4,94.4] |              |
| Armenia                   | 6.3                         | 5.3         | 3.1         | 2.2         | 1.1          | 83.3        | 48.5        | 34.7        | 16.7         |
|                           | [3.8,10.4]                  | [3.0,9.2]   | [1.5,6.1]   | [0.8,5.9]   | [0.2,4.8]    | [47.6,96.5] | [23.1,74.7] | [14.5,62.6] | [3.5,52.4]   |
| Kyrgyz Republic           | 19.6                        | 17.3        | 13.4        | 3.8         | 2.3          | 88.1        | 68.5        | 19.6        | 11.9         |
|                           | [14.0,27.5]                 | [11.7,25.5] | [8.9,20.3]  | [2.0,7.4]   | [1.1,4.7]    | [75.0,94.8] | [55.0,79.5] | [10.8,33.0] | [5.2,25.0]   |
| Moldova                   | 16.3                        | 14.6        | 13.3        | 1.4         | 1.6          | 89.9        | 81.6        | 8.3         | 10.1         |
|                           | [10.1,26.2]                 | [9.2,23.2]  | [8.1,21.7]  | [0.3,5.9]   | [0.4,6.3]    | [67.4,97.5] | [58.4,93.3] | [1.2,40.7]  | [2.5,32.6]   |
| Tajikistan                | 33.4                        | 29.9        | 12.8        | 17.1        | 3.5          | 89.5        | 38.4        | 51.1        | 10.5         |



|                            |              |              |             |             |             |             |             |             |             |
|----------------------------|--------------|--------------|-------------|-------------|-------------|-------------|-------------|-------------|-------------|
|                            | [29.0,38.4]  | [25.9,34.4]  | [10.0,16.4] | [13.7,21.2] | [2.1,5.9]   | [83.3,93.6] | [30.0,47.5] | [42.8,59.4] | [6.4,16.7]  |
| Turkey                     | 14.9         | 14.0         | 7.4         | 6.6         | 0.9         | 93.9        | 49.7        | 44.2        | 6.1         |
|                            | [10.2,21.8]  | [9.6,20.4]   | [5.0,11.1]  | [3.4,12.6]  | [0.4,2.3]   | [86.4,97.4] | [32.1,67.4] | [27.8,62.1] | [2.6,13.6]  |
| Turkmenistan               | 37.9         | 33.4         | 22.1        | 11.3        | 4.4         | 88.3        | 58.4        | 29.9        | 11.7        |
|                            | [31.2,45.8]  | [27.3,40.8]  | [16.9,28.9] | [7.9,16.3]  | [2.6,7.5]   | [81.5,92.7] | [48.0,68.0] | [21.0,40.7] | [7.3,18.5]  |
| Middle East & North Africa | 30.2         | 27.3         | 15.5        | 11.8        | 2.9         | 90.3        | 51.3        | 39.1        | 9.7         |
|                            | [28.1,32.5]  | [25.2,29.6]  | [13.9,17.2] | [10.7,13.0] | [2.4,3.5]   | [88.3,92.0] | [48.3,54.2] | [36.1,42.1] | [8.0,11.7]  |
| Egypt                      | 27.5         | 24.4         | 13.8        | 10.6        | 3.1         | 88.7        | 50.1        | 38.6        | 11.3        |
|                            | [24.8,30.5]  | [21.8,27.2]  | [11.9,16.0] | [8.9,12.6]  | [2.2,4.3]   | [84.6,91.9] | [44.8,55.4] | [33.6,43.9] | [8.1,15.4]  |
| Iraq                       | 25.7         | 23.4         | 14.4        | 9.0         | 2.3         | 90.9        | 56.1        | 34.8        | 9.1         |
|                            | [21.8,30.3]  | [19.8,27.7]  | [11.4,18.3] | [7.3,10.9]  | [1.5,3.6]   | [86.9,93.8] | [49.8,62.2] | [28.4,41.9] | [6.2,13.1]  |
| Jordan                     | 19.4         | 17.6         | 10.7        | 6.9         | 1.8         | 90.8        | 55.5        | 35.4        | 9.2         |
|                            | [15.6,24.1]  | [14.1,21.9]  | [8.0,14.4]  | [4.7,10.1]  | [0.9,3.3]   | [83.9,95.0] | [42.3,67.9] | [25.0,47.3] | [5.0,16.1]  |
| State of Palestine         | 21.7         | 20.0         | 11.2        | 8.9         | 1.7         | 92.3        | 51.4        | 40.8        | 7.7         |
|                            | [18.3,25.8]  | [16.5,24.3]  | [8.9,14.0]  | [6.7,11.7]  | [0.9,3.0]   | [85.9,95.9] | [44.1,58.7] | [33.1,49.0] | [4.1,14.1]  |
| Tunisia                    | 16.7         | 15.0         | 8.7         | 6.3         | 1.7         | 89.6        | 51.8        | 37.9        | 10.4        |
|                            | [13.0,21.5]  | [11.3,19.8]  | [6.0,12.4]  | [4.0,10.1]  | [0.9,3.3]   | [80.3,94.8] | [37.0,66.3] | [26.0,51.4] | [5.2,19.7]  |
| Yemen                      | 52.8         | 48.6         | 25.9        | 22.7        | 4.2         | 92.1        | 49.1        | 43.1        | 7.9         |
|                            | [47.3,58.8]  | [43.7,54.0]  | [22.4,29.9] | [19.6,26.3] | [2.9,5.9]   | [89.3,94.3] | [44.0,54.2] | [38.4,47.8] | [5.7,10.7]  |
| Eastern & Southern Africa  | 65.5         | 53.8         | 27.1        | 11.6        | 11.6        | 82.3        | 40.8        | 41.4        | 17.7        |
|                            | [63.1,67.9]  | [51.9,55.8]  | [25.3,28.2] | [25.6,28.7] | [10.7,12.7] | [80.9,83.5] | [38.9,42.8] | [39.8,43.1] | [16.5,19.1] |
| Angola                     | 68.3         | 52.5         | 24.2        | 28.3        | 15.8        | 76.9        | 35.4        | 41.5        | 23.1        |
|                            | [60.1,77.5]  | [45.9,60.1]  | [20.2,28.9] | [24.2,33.1] | [13.0,19.2] | [73.2,80.2] | [31.2,39.8] | [37.7,45.4] | [19.8,26.8] |
| Burundi                    | 78.1         | 59.2         | 22.9        | 36.2        | 19.0        | 75.7        | 29.4        | 46.4        | 24.3        |
|                            | [72.3,84.4]  | [53.5,65.5]  | [19.3,27.2] | [32.0,41.0] | [16.9,21.2] | [72.6,78.7] | [25.5,33.6] | [42.3,50.5] | [21.3,27.4] |
| Comoros                    | 49.7         | 38.6         | 23.5        | 15.0        | 11.1        | 77.6        | 47.3        | 30.2        | 22.4        |
|                            | [40.7,60.6]  | [30.3,49.0]  | [18.0,30.8] | [10.3,21.9] | [7.2,17.1]  | [67.2,85.4] | [39.1,55.7] | [21.7,40.4] | [14.6,32.8] |
| Ethiopia                   | 67.0         | 55.5         | 29.5        | 26.1        | 11.5        | 82.9        | 44.0        | 38.9        | 17.1        |
|                            | [59.9,75.0]  | [49.9,61.8]  | [24.4,35.6] | [21.6,31.5] | [8.7,15.2]  | [78.6,86.4] | [37.0,51.2] | [32.6,45.6] | [13.6,21.4] |
| Kenya                      | 52.4         | 44.3         | 22.3        | 22.0        | 8.0         | 84.7        | 42.6        | 42.1        | 15.3        |
|                            | [48.0,57.1]  | [40.0,49.1]  | [19.6,25.4] | [18.8,25.8] | [6.4,10.0]  | [81.0,87.8] | [38.1,47.2] | [37.3,47.0] | [12.2,19.0] |
| Lesotho                    | 76.2         | 66.1         | 36.4        | 29.7        | 10.1        | 86.7        | 47.8        | 38.9        | 13.3        |
|                            | [62.0,93.3]  | [54.1,80.4]  | [28.2,46.9] | [23.0,38.2] | [5.6,18.3]  | [78.5,92.1] | [39.8,55.9] | [32.1,46.2] | [7.9,21.5]  |
| Madagascar                 | 58.7         | 43.7         | 21.0        | 22.6        | 15.0        | 74.5        | 35.9        | 38.6        | 25.5        |
|                            | [54.0,63.8]  | [39.8,48.0]  | [18.6,23.9] | [19.3,26.6] | [13.0,17.2] | [71.5,77.2] | [31.7,40.2] | [34.3,43.1] | [22.8,28.5] |
| Malawi                     | 63.8         | 49.1         | 26.7        | 22.4        | 14.7        | 76.9        | 41.8        | 35.1        | 23.1        |
|                            | [58.6,69.4]  | [44.5,54.1]  | [23.2,30.6] | [19.6,25.6] | [11.9,18.2] | [72.2,81.0] | [37.1,46.6] | [31.4,39.0] | [19.0,27.8] |
| Mozambique                 | 96.9         | 78.0         | 30.4        | 47.6        | 18.9        | 80.5        | 31.4        | 49.1        | 19.5        |
|                            | [89.9,104.4] | [72.1,84.4]  | [26.2,35.3] | [43.1,52.6] | [15.5,23.0] | [77.1,83.6] | [27.6,35.5] | [45.2,53.0] | [16.4,22.9] |
| Namibia                    | 54.5         | 45.9         | 19.7        | 26.2        | 8.6         | 84.2        | 36.2        | 48.0        | 15.8        |
|                            | [46.2,64.1]  | [38.2,55.0]  | [14.6,26.6] | [21.6,31.7] | [6.2,11.9]  | [78.6,88.6] | [28.9,44.2] | [41.1,55.0] | [11.4,21.4] |
| Rwanda                     | 50.4         | 39.6         | 19.6        | 20.0        | 10.8        | 78.6        | 38.9        | 39.7        | 21.4        |
|                            | [45.3,56.0]  | [35.2,44.4]  | [16.7,23.0] | [16.9,23.7] | [8.9,13.0]  | [75.0,81.8] | [34.0,44.0] | [35.1,44.5] | [18.2,25.0] |
| South Africa               | 42.1         | 38.2         | 21.0        | 17.2        | 3.9         | 90.8        | 50.0        | 40.8        | 9.2         |
|                            | [34.1,51.8]  | [30.3,48.0]  | [14.8,29.8] | [13.1,22.5] | [2.6,5.9]   | [85.9,94.1] | [39.6,60.4] | [31.8,50.4] | [5.9,14.1]  |
| South Sudan                | 108.3        | 90.5         | 42.6        | 47.9        | 17.7        | 83.6        | 39.4        | 44.3        | 16.4        |
|                            | [98.8,118.5] | [81.7,100.2] | [35.9,50.5] | [42.4,54.1] | [14.5,21.6] | [80.3,86.5] | [34.5,44.5] | [40.0,48.6] | [13.5,19.7] |
| Sudan                      | 68.4         | 60.1         | 32.6        | 27.5        | 8.3         | 87.9        | 47.6        | 40.3        | 12.1        |
|                            | [63.2,74.0]  | [55.3,65.3]  | [29.1,36.4] | [24.2,31.3] | [6.9,10.0]  | [85.6,89.8] | [43.4,51.9] | [36.5,44.1] | [10.2,14.4] |
| Swaziland                  | 67.0         | 57.4         | 20.1        | 37.3        | 9.6         | 85.7        | 30.0        | 55.7        | 14.3        |
|                            | [55.1,81.2]  | [45.3,72.6]  | [14.0,28.9] | [28.7,48.4] | [5.7,15.9]  | [76.3,91.8] | [22.5,38.9] | [46.9,64.1] | [8.2,23.7]  |
| Tanzania                   | 67.2         | 55.9         | 25.5        | 30.4        | 11.3        | 83.2        | 37.9        | 45.3        | 16.8        |
|                            | [58.6,76.8]  | [49.0,63.7]  | [21.4,30.3] | [25.5,36.2] | [8.6,14.8]  | [79.5,86.4] | [32.8,43.2] | [40.6,50.1] | [13.6,20.5] |

|                           |               |              |             |             |             |             |             |             |             |
|---------------------------|---------------|--------------|-------------|-------------|-------------|-------------|-------------|-------------|-------------|
| Uganda                    | 64.3          | 52.1         | 26.7        | 25.3        | 12.2        | 81.0        | 41.6        | 39.4        | 19.0        |
|                           | [59.9,69.0]   | [48.4,56.0]  | [24.7,29.0] | [22.6,28.4] | [10.4,14.3] | [78.5,83.3] | [39.0,44.2] | [36.1,42.8] | [16.7,21.5] |
| Zambia                    | 60.5          | 49.5         | 27.4        | 22.1        | 11.0        | 81.9        | 45.4        | 36.5        | 18.1        |
|                           | [55.1,66.4]   | [44.8,54.7]  | [23.8,31.7] | [19.3,25.3] | [8.8,13.7]  | [78.0,85.2] | [40.4,50.5] | [32.8,40.5] | [14.8,22.0] |
| Zimbabwe                  | 64.9          | 55.3         | 32.3        | 23.0        | 9.6         | 85.2        | 49.8        | 35.4        | 14.8        |
|                           | [56.7,74.2]   | [48.7,62.7]  | [26.6,39.1] | [19.8,26.7] | [6.9,13.3]  | [81.1,88.5] | [44.3,55.3] | [30.1,41.1] | [11.5,18.9] |
| West & Central Africa     | 111.4         | 78.0         | 32.9        | 45.1        | 33.4        | 70.0        | 29.5        | 40.5        | 30.0        |
|                           | [108.1,114.7] | [75.3,80.7]  | [31.1,34.7] | [43.4,47.0] | [32.0,34.8] | [69.0,71.0] | [28.4,30.7] | [39.3,41.7] | [29.0,31.0] |
| Benin                     | 96.2          | 68.3         | 30.0        | 38.2        | 28.0        | 70.9        | 31.2        | 39.7        | 29.1        |
|                           | [89.2,103.7]  | [62.5,74.5]  | [26.2,34.3] | [34.7,42.1] | [24.6,31.7] | [67.8,73.9] | [28.2,34.4] | [36.8,42.8] | [26.1,32.2] |
| Burkina Faso              | 128.5         | 89.3         | 28.1        | 61.3        | 39.2        | 69.5        | 21.8        | 47.7        | 30.5        |
|                           | [121.0,136.5] | [83.3,95.7]  | [25.4,31.0] | [56.1,66.8] | [35.9,42.8] | [67.4,71.5] | [20.0,23.8] | [45.1,50.2] | [28.5,32.6] |
| Cameroon                  | 79.6          | 59.4         | 28.1        | 31.3        | 20.2        | 74.6        | 35.3        | 39.3        | 25.4        |
|                           | [72.9,86.9]   | [53.6,65.8]  | [24.3,32.5] | [27.1,36.2] | [17.3,23.6] | [71.1,77.9] | [31.3,39.5] | [35.3,43.5] | [22.1,28.9] |
| Chad                      | 133.0         | 95.0         | 33.8        | 61.2        | 38.0        | 71.4        | 25.4        | 46.0        | 28.6        |
|                           | [124.1,142.4] | [86.0,104.9] | [29.6,38.6] | [54.9,68.2] | [35.0,41.2] | [68.5,74.2] | [23.0,28.0] | [43.3,48.8] | [25.8,31.5] |
| Congo                     | 67.8          | 50.4         | 21.5        | 28.8        | 17.4        | 74.3        | 31.8        | 42.5        | 25.7        |
|                           | [60.1,76.4]   | [43.4,58.4]  | [16.8,27.6] | [24.2,34.3] | [14.5,20.8] | [69.7,78.4] | [25.9,38.3] | [37.3,48.0] | [21.6,30.3] |
| Congo (DR)                | 104.3         | 74.1         | 28.0        | 46.1        | 30.2        | 71.0        | 26.8        | 44.2        | 29.0        |
|                           | [97.2,111.8]  | [68.4,80.2]  | [24.4,32.0] | [41.8,50.9] | [26.5,34.4] | [67.9,74.0] | [23.9,30.0] | [41.0,47.5] | [26.0,32.1] |
| Cote D'Ivoire             | 96.2          | 74.3         | 33.3        | 41.0        | 21.9        | 77.2        | 34.6        | 42.6        | 22.8        |
|                           | [87.5,105.8]  | [67.2,82.1]  | [29.5,37.7] | [35.2,47.6] | [18.1,26.5] | [73.6,80.5] | [31.0,38.4] | [38.2,47.1] | [19.5,26.4] |
| Gabon                     | 64.6          | 49.7         | 26.3        | 23.4        | 14.9        | 76.9        | 40.7        | 36.2        | 23.1        |
|                           | [56.6,73.7]   | [41.7,59.3]  | [20.0,34.6] | [18.5,29.5] | [10.6,20.9] | [68.4,83.7] | [32.3,49.7] | [29.2,43.9] | [16.3,31.6] |
| Gambia                    | 57.2          | 46.9         | 30.6        | 16.2        | 10.4        | 81.9        | 53.5        | 28.3        | 18.1        |
|                           | [51.1,64.0]   | [41.6,52.7]  | [25.6,36.6] | [13.5,19.5] | [8.3,13.0]  | [78.2,85.1] | [47.0,59.9] | [23.5,33.8] | [14.9,21.8] |
| Ghana                     | 59.9          | 46.7         | 28.7        | 18.0        | 13.2        | 78.0        | 47.9        | 30.1        | 22.0        |
|                           | [51.0,70.1]   | [39.4,55.3]  | [22.6,36.3] | [14.2,22.9] | [9.1,19.0]  | [70.3,84.2] | [41.4,54.5] | [23.2,38.0] | [15.8,29.7] |
| Guinea                    | 111.5         | 82.9         | 32.3        | 50.6        | 28.6        | 74.4        | 29.0        | 45.4        | 25.6        |
|                           | [100.6,123.3] | [74.3,92.4]  | [28.2,36.9] | [43.2,59.2] | [24.3,33.6] | [71.2,77.3] | [25.4,32.9] | [41.2,49.7] | [22.7,28.8] |
| Liberia                   | 93.8          | 73.2         | 26.2        | 47.0        | 20.6        | 78.0        | 28.0        | 50.1        | 22.0        |
|                           | [84.8,103.8]  | [64.7,82.7]  | [21.7,31.7] | [40.7,54.2] | [17.7,24.0] | [74.4,81.2] | [24.0,32.3] | [45.6,54.5] | [18.8,25.6] |
| Mali                      | 101.1         | 69.6         | 32.5        | 37.1        | 31.5        | 68.9        | 32.2        | 36.7        | 31.1        |
|                           | [92.8,110.0]  | [63.4,76.3]  | [28.0,37.7] | [32.9,41.7] | [27.4,36.1] | [65.6,71.9] | [28.3,36.3] | [33.4,40.0] | [28.1,34.4] |
| Mauritania                | 53.8          | 45.6         | 28.9        | 16.7        | 8.2         | 84.8        | 53.7        | 31.1        | 15.2        |
|                           | [47.1,61.3]   | [39.9,52.1]  | [24.8,33.6] | [13.7,20.4] | [6.3,10.6]  | [81.0,88.0] | [48.9,58.5] | [26.8,35.8] | [12.0,19.0] |
| Niger                     | 127.3         | 76.5         | 24.2        | 52.4        | 50.8        | 60.1        | 19.0        | 41.1        | 39.9        |
|                           | [119.4,135.7] | [70.3,83.3]  | [21.1,27.7] | [47.1,58.2] | [46.3,55.7] | [57.1,63.0] | [16.7,21.5] | [38.1,44.3] | [37.0,42.9] |
| Nigeria                   | 132.0         | 90.4         | 39.3        | 51.1        | 41.7        | 68.4        | 29.7        | 38.7        | 31.6        |
|                           | [123.7,140.8] | [84.6,96.5]  | [35.2,43.8] | [47.3,55.3] | [38.0,45.6] | [66.7,70.1] | [27.3,32.3] | [36.5,41.0] | [29.9,33.3] |
| Sao Tome & Principe       | 44.9          | 41.0         | 21.9        | 19.1        | 3.9         | 91.4        | 48.9        | 42.5        | 8.6         |
|                           | [35.0,57.4]   | [31.8,52.8]  | [15.4,31.3] | [13.3,27.2] | [1.7,8.8]   | [81.3,96.3] | [37.3,60.6] | [30.9,55.0] | [3.7,18.7]  |
| Senegal                   | 37.1          | 32.9         | 20.7        | 12.2        | 4.2         | 88.7        | 55.9        | 32.8        | 11.3        |
|                           | [30.9,44.4]   | [27.1,39.9]  | [16.3,26.2] | [9.8,15.2]  | [2.7,6.6]   | [82.8,92.8] | [48.9,62.6] | [27.5,38.7] | [7.2,17.2]  |
| Sierra Leone              | 122.1         | 95.2         | 30.5        | 64.7        | 26.9        | 78.0        | 25.0        | 53.0        | 22.0        |
|                           | [113.2,131.6] | [88.4,102.5] | [25.7,36.2] | [58.5,71.5] | [22.4,32.2] | [74.7,81.0] | [21.1,29.4] | [49.0,56.9] | [19.0,25.3] |
| Togo                      | 71.3          | 48.2         | 27.4        | 20.7        | 23.1        | 67.6        | 38.5        | 29.1        | 32.4        |
|                           | [62.9,80.8]   | [41.0,56.6]  | [21.9,34.4] | [16.2,26.5] | [19.0,28.1] | [61.7,72.9] | [32.2,45.2] | [23.4,35.6] | [27.1,38.3] |
| Latin America & Caribbean | 29.9          | 27.0         | 14.7        | 12.3        | 2.9         | 90.3        | 49.1        | 41.2        | 9.7         |
|                           | [28.1,31.7]   | [25.2,28.9]  | [13.7,15.7] | [10.8,14.0] | [2.4,3.5]   | [88.3,91.9] | [45.9,52.2] | [37.7,44.8] | [8.1,11.7]  |
| Colombia                  | 16.3          | 15.4         | 8.5         | 6.8         | 1.0         | 94.0        | 52.3        | 41.7        | 6.0         |
|                           | [13.8,19.3]   | [13.0,18.1]  | [6.7,10.9]  | [5.4,8.6]   | [0.5,1.7]   | [90.1,96.4] | [43.4,60.9] | [34.2,49.7] | [3.6,9.9]   |
| Dominican Republic        | 35.1          | 32.6         | 24.6        | 8.0         | 2.5         | 93.0        | 70.1        | 22.9        | 7.0         |

|                               |             |             |             |             |             |             |             |             |             |
|-------------------------------|-------------|-------------|-------------|-------------|-------------|-------------|-------------|-------------|-------------|
|                               | [30.5,40.3] | [27.9,38.1] | [20.6,29.3] | [5.8,11.2]  | [1.4,4.3]   | [87.7,96.1] | [62.1,76.9] | [17.4,29.6] | [3.9,12.3]  |
| El Salvador                   | 19.9        | 18.8        | 11.0        | 7.8         | 1.1         | 94.7        | 55.4        | 39.3        | 5.3         |
|                               | [15.1,26.0] | [14.2,24.9] | [7.2,16.7]  | [5.6,10.8]  | [0.5,2.4]   | [88.0,97.7] | [42.6,67.5] | [27.7,52.2] | [2.3,12.0]  |
| Guatemala                     | 35.4        | 32.3        | 16.9        | 15.3        | 3.1         | 91.2        | 47.9        | 43.3        | 8.8         |
|                               | [31.1,40.2] | [28.0,37.1] | [14.7,19.5] | [11.9,19.6] | [2.2,4.3]   | [87.8,93.7] | [42.2,53.7] | [36.7,50.2] | [6.3,12.2]  |
| Guyana                        | 39.2        | 34.7        | 22.9        | 11.8        | 4.5         | 88.5        | 58.4        | 30.1        | 11.5        |
|                               | [28.6,53.6] | [24.1,49.8] | [15.1,34.7] | [7.5,18.5]  | [1.8,11.3]  | [72.7,95.7] | [45.9,69.9] | [20.8,41.4] | [4.3,27.3]  |
| Haiti                         | 81.2        | 69.5        | 31.6        | 37.9        | 11.8        | 85.5        | 38.9        | 46.7        | 14.5        |
|                               | [70.8,93.0] | [59.1,81.6] | [25.8,38.7] | [30.0,47.8] | [9.1,15.1]  | [81.1,89.0] | [32.8,45.3] | [39.9,53.5] | [11.0,18.9] |
| Honduras                      | 29.0        | 26.2        | 17.6        | 8.6         | 2.8         | 90.4        | 60.7        | 29.7        | 9.6         |
|                               | [26.1,32.3] | [23.4,29.5] | [14.9,20.8] | [6.8,10.9]  | [1.9,4.0]   | [86.2,93.4] | [53.0,68.0] | [23.6,36.6] | [6.6,13.8]  |
| Paraguay                      | 18.5        | 17.7        | 6.0         | 11.7        | 0.8         | 95.8        | 32.5        | 63.2        | 4.2         |
|                               | [14.0,24.4] | [13.3,23.5] | [4.0,9.0]   | [7.5,18.1]  | [0.3,2.2]   | [89.1,98.4] | [20.5,47.4] | [48.5,75.8] | [1.6,10.9]  |
| Peru                          | 20.9        | 19.0        | 10.4        | 8.6         | 1.9         | 90.9        | 49.6        | 41.3        | 9.1         |
|                               | [18.0,24.3] | [16.0,22.5] | [8.4,12.8]  | [6.6,11.2]  | [1.2,3.0]   | [85.2,94.5] | [42.0,57.2] | [33.8,49.2] | [5.5,14.8]  |
| Suriname                      | 19.5        | 17.9        | 12.4        | 5.5         | 1.6         | 91.8        | 63.8        | 28.0        | 8.2         |
|                               | [12.9,29.3] | [11.8,27.0] | [7.4,20.7]  | [2.8,10.5]  | [0.6,4.2]   | [79.4,97.0] | [44.1,79.7] | [14.2,47.8] | [3.0,20.6]  |
| Low-Income Countries          | 82.9        | 63.6        | 27.9        | 35.6        | 19.4        | 76.6        | 33.7        | 43.0        | 23.4        |
|                               | [80.7,85.2] | [61.8,65.4] | [26.8,29.1] | [34.1,37.2] | [18.2,20.6] | [75.4,77.8] | [32.2,35.1] | [41.7,44.3] | [22.2,24.6] |
| Lower-Middle-Income Countries | 62.3        | 51.0        | 29.2        | 21.9        | 11.2        | 82.0        | 46.9        | 35.1        | 18.0        |
|                               | [60.8,63.8] | [49.8,52.3] | [28.3,30.1] | [21.0,22.7] | [10.7,11.8] | [81.3,82.7] | [45.7,48.0] | [34.2,36.0] | [17.3,18.7] |
| Upper-Middle-Income Countries | 28.8        | 25.7        | 14.5        | 11.2        | 3.1         | 89.1        | 50.3        | 38.8        | 10.9        |
|                               | [26.9,30.9] | [23.9,27.6] | [13.2,15.9] | [10.1,12.4] | [2.6,3.7]   | [87.3,90.7] | [46.9,53.7] | [35.9,41.8] | [9.3,12.7]  |

Notes: 95% confidence intervals are shown in brackets.

**eTable 3.** Share of Deaths Among Children Younger Than 5 Years Occurring at Different Ages Using Detailed Age Intervals: Period Restricted to 5 Years Before Survey Instead of 10 Years

|                           | <1 month     | 1–2 months   | 3–5 months   | 6–11 months  | 12–23 months | 24–35 months | 36–47 months | 48–59 months |
|---------------------------|--------------|--------------|--------------|--------------|--------------|--------------|--------------|--------------|
| Pooled                    | 43.3         | 8.0          | 6.7          | 11.1         | 11.8         | 9.2          | 6.1          | 3.7          |
|                           | [42.4, 44.2] | [7.6, 8.4]   | [6.3, 7.1]   | [10.6, 11.6] | [11.4, 12.3] | [8.8, 9.7]   | [5.8, 6.5]   | [3.4, 4.0]   |
| Least Developed Countries | 36.8         | 8.2          | 7.2          | 12.8         | 13.3         | 10.5         | 6.7          | 4.4          |
|                           | [35.7, 37.9] | [7.6, 8.9]   | [6.6, 7.7]   | [12.3, 13.5] | [12.7, 14.0] | [9.9, 11.1]  | [6.2, 7.3]   | [4.1, 4.8]   |
| East Asia & Pacific       | 48.7         | 11.2         | 7.0          | 9.7          | 9.8          | 5.1          | 6.0          | 2.5          |
|                           | [45.3, 52.2] | [9.3, 13.3]  | [5.4, 9.1]   | [7.9, 11.8]  | [8.0, 11.9]  | [4.0, 6.5]   | [4.2, 8.6]   | [1.8, 3.4]   |
| Cambodia                  | 51.3         | 15.9         | 5.4          | 7.9          | 7.1          | 2.9          | 6.5          | 3.0          |
|                           | [43.0, 59.5] | [11.1, 22.4] | [2.6, 10.9]  | [4.9, 12.4]  | [4.6, 10.9]  | [1.3, 6.4]   | [4.0, 10.5]  | [1.7, 5.2]   |
| Indonesia                 | 48.9         | 9.5          | 5.8          | 10.9         | 11.7         | 4.5          | 6.4          | 2.3          |
|                           | [44.4, 53.4] | [6.4, 13.9]  | [3.6, 9.0]   | [7.9, 14.7]  | [9.1, 15.0]  | [2.9, 7.0]   | [4.1, 9.7]   | [1.3, 4.2]   |
| Lao                       | 39.1         | 25.4         | 15.7         | 7.7          | 3.1          | 3.9          | 2.5          | 2.6          |
|                           | [34.2, 44.3] | [21.0, 30.2] | [12.5, 19.6] | [5.7, 10.4]  | [1.7, 5.7]   | [2.5, 6.0]   | [1.5, 4.2]   | [1.2, 5.4]   |
| Mongolia                  | 45.2         | 17.9         | 6.4          | 11.2         | 3.9          | 6.0          | 8.9          | 0.5          |
|                           | [33.0, 58.1] | [9.8, 30.4]  | [2.0, 18.7]  | [4.6, 24.8]  | [1.7, 8.8]   | [2.7, 13.0]  | [3.5, 20.8]  | [0.1, 2.9]   |
| Myanmar                   | 49.1         | 14.9         | 6.9          | 9.8          | 6.0          | 6.5          | 5.8          | 1.1          |
|                           | [39.2, 59.1] | [9.4, 22.8]  | [4.1, 11.2]  | [5.2, 17.7]  | [3.4, 10.3]  | [3.5, 11.8]  | [3.1, 10.6]  | [0.5, 2.6]   |
| Papua New Guinea          | 42.0         | 5.3          | 9.3          | 11.8         | 9.2          | 12.5         | 7.3          | 2.6          |
|                           | [35.3, 49.1] | [3.1, 8.7]   | [5.1, 16.3]  | [8.3, 16.5]  | [5.5, 15.0]  | [9.5, 16.3]  | [4.7, 11.2]  | [1.2, 5.4]   |
| Philippines               | 49.9         | 10.6         | 9.2          | 6.8          | 9.5          | 4.8          | 5.5          | 3.7          |
|                           | [40.8, 59.1] | [6.5, 16.9]  | [5.7, 14.5]  | [4.4, 10.4]  | [6.0, 14.5]  | [3.2, 7.2]   | [3.1, 9.5]   | [1.7, 8.0]   |
| Timor-Leste               | 44.7         | 8.6          | 8.5          | 10.7         | 7.2          | 8.2          | 6.4          | 5.7          |
|                           | [37.7, 52.0] | [5.4, 13.3]  | [5.1, 13.9]  | [7.1, 15.7]  | [4.4, 11.6]  | [5.4, 12.1]  | [3.9, 10.3]  | [3.2, 10.1]  |
| Tonga                     | 43.3         | 13.1         | 9.2          | 25.5         | NA           | 3.2          | 5.7          | NA           |
|                           | [25.8, 62.7] | [1.8, 54.7]  | [2.8, 26.4]  | [7.6, 58.5]  |              | [0.2, 35.4]  | [0.8, 30.4]  |              |
| South Asia                | 58.3         | 9.3          | 6.6          | 8.4          | 7.0          | 4.1          | 3.8          | 2.4          |
|                           | [56.9, 59.7] | [8.6, 10.1]  | [5.9, 7.3]   | [7.7, 9.3]   | [6.3, 7.9]   | [3.7, 4.5]   | [3.4, 4.3]   | [2.1, 2.7]   |
| Afghanistan               | 40.2         | 13.9         | 11.5         | 15.5         | 8.3          | 5.7          | 3.3          | 1.5          |
|                           | [35.9, 44.7] | [9.7, 19.5]  | [9.3, 14.2]  | [12.4, 19.3] | [6.4, 10.7]  | [4.4, 7.4]   | [2.3, 4.8]   | [0.8, 2.6]   |
| Bangladesh                | 65.5         | 7.1          | 6.5          | 5.5          | 5.1          | 4.9          | 2.9          | 2.4          |
|                           | [61.6, 69.3] | [5.6, 9.1]   | [5.0, 8.5]   | [4.2, 7.3]   | [3.6, 7.2]   | [3.3, 7.1]   | [1.8, 4.5]   | [1.5, 4.0]   |
| India                     | 59.2         | 8.6          | 6.4          | 7.7          | 7.2          | 4.2          | 4.2          | 2.6          |
|                           | [57.9, 60.6] | [8.1, 9.1]   | [5.8, 7.0]   | [7.1, 8.3]   | [6.6, 7.9]   | [3.8, 4.5]   | [3.9, 4.6]   | [2.3, 2.9]   |
| Maldives                  | 55.8         | 10.1         | 12.7         | 10.2         | 2.1          | 2.8          | 3.3          | 2.9          |
|                           | [34.2, 75.4] | [3.8, 24.4]  | [4.1, 33.1]  | [2.3, 35.1]  | [0.6, 6.8]   | [0.7, 10.5]  | [1.0, 10.8]  | [0.8, 10.5]  |
| Nepal                     | 55.9         | 14.7         | 7.5          | 8.8          | 2.8          | 3.7          | 2.0          | 4.7          |
|                           | [48.2, 63.3] | [9.4, 22.1]  | [4.2, 13.1]  | [5.2, 14.5]  | [1.1, 7.1]   | [1.7, 8.1]   | [0.6, 6.6]   | [2.1, 10.0]  |
| Pakistan                  | 56.5         | 11.3         | 6.2          | 10.4         | 7.1          | 3.5          | 3.0          | 2.0          |
|                           | [51.3, 61.5] | [8.6, 14.7]  | [4.3, 8.9]   | [8.0, 13.4]  | [5.1, 9.7]   | [2.2, 5.5]   | [1.8, 4.9]   | [1.2, 3.3]   |
| Europe & Central Asia     | 50.5         | 6.1          | 11.6         | 18.0         | 5.5          | 4.7          | 2.7          | 1.1          |
|                           | [43.7, 57.2] | [4.0, 9.1]   | [7.2, 18.1]  | [11.6, 26.7] | [3.3, 9.0]   | [2.6, 8.3]   | [1.4, 5.0]   | [0.5, 2.4]   |
| Albania                   | 37.3         | NA           | 4.1          | NA           | 34.8         | NA           | NA           | NA           |
|                           | [5.6, 85.6]  |              | [0.1, 74.0]  | [5.8, 82.2]  | [4.6, 67.1]  |              |              |              |
| Armenia                   | 48.5         | NA           | NA           | 17.3         | 17.4         | 14.5         | 2.2          | NA           |
|                           | [23.1, 74.7] |              |              | [4.2, 50.0]  | [4.5, 48.5]  | [2.8, 50.3]  | [0.1, 26.6]  |              |
| Kyrgyz Republic           | 68.5         | 11.0         | 1.1          | 6.1          | 1.5          | 8.9          | 2.6          | 0.4          |
|                           | [55.0, 79.5] | [4.9, 22.8]  | [0.1, 11.7]  | [2.0, 17.3]  | [0.4, 5.6]   | [3.1, 22.9]  | [0.6, 10.5]  | [0.1, 2.7]   |
| Moldova                   | 81.6         | 8.3          | NA           | NA           | NA           | 8.5          | NA           | 1.6          |

|                            |              |              |              |              |              |             |             |             |
|----------------------------|--------------|--------------|--------------|--------------|--------------|-------------|-------------|-------------|
|                            | [58.4, 93.3] | [1.2, 40.7]  |              |              |              | [1.7, 32.7] |             | [0.1, 18.7] |
| Tajikistan                 | 38.4         | 8.6          | 10.5         | 23.3         | 8.7          | 4.4         | 3.0         | 3.1         |
|                            | [30.0, 47.5] | [5.4, 13.3]  | [6.2, 17.2]  | [17.8, 29.9] | [5.5, 13.7]  | [2.0, 9.4]  | [1.3, 6.9]  | [1.2, 7.9]  |
| Turkey                     | 49.7         | 4.2          | 14.4         | 20.7         | 4.9          | 3.8         | 2.2         | NA          |
|                            | [32.1, 67.4] | [1.4, 11.7]  | [6.8, 28.0]  | [8.6, 42.0]  | [0.7, 26.2]  | [1.3, 10.9] | [0.6, 7.8]  |             |
| Turkmenistan               | 58.4         | 5.2          | 12.0         | 8.8          | 3.8          | 5.1         | 4.3         | 2.4         |
|                            | [48.0, 68.0] | [2.9, 9.3]   | [6.4, 21.3]  | [5.0, 15.1]  | [1.5, 9.4]   | [2.5, 9.9]  | [1.8, 9.6]  | [0.5, 10.9] |
| Middle East & North Africa | 51.3         | 10.9         | 9.4          | 11.3         | 7.4          | 4.6         | 3.3         | 1.8         |
|                            | [48.3, 54.2] | [9.3, 12.9]  | [7.7, 11.6]  | [9.3, 13.5]  | [6.1, 9.0]   | [3.4, 6.1]  | [2.3, 4.8]  | [1.1, 2.8]  |
| Egypt                      | 50.1         | 12.3         | 9.5          | 9.2          | 7.7          | 5.3         | 4.5         | 1.5         |
|                            | [44.8, 55.4] | [9.4, 15.8]  | [7.1, 12.4]  | [6.0, 13.7]  | [5.6, 10.6]  | [3.4, 8.2]  | [2.5, 7.7]  | [0.5, 4.5]  |
| Iraq                       | 56.1         | 7.7          | 10.6         | 13.2         | 3.4          | 3.4         | 3.9         | 1.8         |
|                            | [49.8, 62.2] | [5.5, 10.9]  | [6.8, 15.9]  | [9.7, 17.6]  | [2.0, 5.6]   | [2.0, 5.7]  | [1.9, 7.8]  | [1.1, 3.1]  |
| Jordan                     | 55.5         | 4.7          | 10.9         | 15.7         | 4.1          | 4.7         | 3.9         | 0.6         |
|                            | [42.3, 67.9] | [2.3, 9.6]   | [5.6, 19.9]  | [8.7, 26.6]  | [2.0, 8.5]   | [3.0, 7.3]  | [1.2, 11.8] | [0.1, 4.2]  |
| State of Palestine         | 51.4         | 14.8         | 8.0          | 9.8          | 8.3          | 3.2         | 2.9         | 1.7         |
|                            | [44.1, 58.7] | [10.3, 20.7] | [4.7, 13.1]  | [5.9, 15.8]  | [5.2, 13.2]  | [1.3, 7.3]  | [1.0, 7.9]  | [0.5, 5.2]  |
| Tunisia                    | 51.8         | 14.0         | 4.5          | 13.0         | 6.3          | 4.7         | 4.0         | 1.7         |
|                            | [37.0, 66.3] | [7.5, 24.8]  | [1.4, 13.3]  | [6.0, 26.0]  | [2.1, 17.3]  | [1.9, 10.8] | [1.2, 13.1] | [0.2, 12.9] |
| Yemen                      | 49.1         | 10.8         | 9.0          | 13.0         | 10.2         | 4.5         | 1.1         | 2.3         |
|                            | [44.0, 54.2] | [8.2, 14.1]  | [6.8, 12.0]  | [10.9, 15.5] | [7.9, 13.0]  | [3.0, 6.7]  | [0.5, 2.2]  | [1.4, 3.7]  |
| Eastern & Southern Africa  | 40.8         | 9.0          | 7.7          | 12.1         | 12.6         | 8.0         | 5.9         | 3.9         |
|                            | [38.9, 42.8] | [8.1, 10.1]  | [6.9, 8.5]   | [11.3, 13.1] | [11.6, 13.6] | [7.4, 8.6]  | [5.1, 6.7]  | [3.4, 4.5]  |
| Angola                     | 35.4         | 10.6         | 5.2          | 13.7         | 12.1         | 10.7        | 8.4         | 4.0         |
|                            | [31.2, 39.8] | [8.1, 13.6]  | [3.8, 6.9]   | [10.9, 17.0] | [9.5, 15.2]  | [8.4, 13.5] | [6.0, 11.8] | [2.9, 5.5]  |
| Burundi                    | 29.4         | 11.1         | 6.8          | 13.0         | 15.5         | 9.2         | 10.2        | 4.9         |
|                            | [25.5, 33.6] | [8.9, 13.9]  | [5.2, 8.7]   | [10.9, 15.4] | [13.0, 18.4] | [7.1, 11.7] | [8.4, 12.3] | [3.6, 6.6]  |
| Comoros                    | 47.3         | 13.6         | 6.3          | 4.8          | 5.5          | 10.7        | 7.6         | 4.1         |
|                            | [39.1, 55.7] | [7.4, 23.7]  | [3.6, 10.7]  | [2.0, 11.3]  | [2.8, 10.7]  | [4.8, 22.0] | [4.0, 14.1] | [1.6, 10.4] |
| Ethiopia                   | 44.0         | 11.0         | 6.3          | 10.5         | 11.1         | 6.9         | 6.2         | 4.1         |
|                            | [37.0, 51.2] | [7.5, 15.9]  | [4.0, 9.6]   | [8.3, 13.1]  | [8.3, 14.8]  | [4.8, 9.7]  | [4.0, 9.4]  | [2.6, 6.5]  |
| Kenya                      | 42.6         | 8.4          | 10.0         | 12.9         | 10.8         | 5.6         | 6.2         | 3.5         |
|                            | [38.1, 47.2] | [6.6, 10.7]  | [8.1, 12.3]  | [10.6, 15.6] | [8.3, 13.8]  | [4.0, 7.7]  | [4.1, 9.1]  | [2.4, 5.2]  |
| Lesotho                    | 47.8         | 8.7          | 11.1         | 14.3         | 4.8          | 6.4         | 3.6         | 3.3         |
|                            | [39.8, 55.9] | [5.5, 13.4]  | [6.8, 17.5]  | [9.5, 21.1]  | [2.6, 8.8]   | [3.8, 10.5] | [0.9, 13.0] | [1.4, 7.7]  |
| Madagascar                 | 35.9         | 11.0         | 7.1          | 13.8         | 6.6          | 11.4        | 7.8         | 6.4         |
|                            | [31.7, 40.2] | [8.4, 14.3]  | [5.3, 9.6]   | [11.3, 16.7] | [4.9, 8.9]   | [9.2, 14.0] | [5.5, 10.8] | [4.6, 8.8]  |
| Malawi                     | 41.8         | 7.2          | 4.9          | 11.5         | 11.5         | 11.6        | 5.7         | 5.8         |
|                            | [37.1, 46.6] | [5.4, 9.5]   | [3.7, 6.5]   | [9.4, 14.0]  | [9.5, 13.9]  | [9.1, 14.7] | [4.2, 7.7]  | [4.0, 8.4]  |
| Mozambique                 | 31.4         | 10.0         | 8.4          | 16.3         | 14.4         | 9.5         | 6.7         | 3.3         |
|                            | [27.6, 35.5] | [8.0, 12.4]  | [6.7, 10.5]  | [13.4, 19.7] | [11.0, 18.6] | [7.6, 11.9] | [5.0, 8.8]  | [2.4, 4.5]  |
| Namibia                    | 36.2         | 10.2         | 9.7          | 15.2         | 12.8         | 6.6         | 6.2         | 2.9         |
|                            | [28.9, 44.2] | [6.9, 14.9]  | [6.6, 14.1]  | [10.9, 20.8] | [8.9, 18.3]  | [3.6, 12.0] | [3.8, 9.9]  | [1.4, 5.9]  |
| Rwanda                     | 38.9         | 6.8          | 5.7          | 12.7         | 14.5         | 7.9         | 6.3         | 7.2         |
|                            | [34.0, 44.0] | [4.7, 9.7]   | [4.0, 8.1]   | [10.0, 16.1] | [11.4, 18.3] | [5.8, 10.8] | [4.2, 9.3]  | [5.2, 9.8]  |
| South Africa               | 50.0         | 5.5          | 17.2         | 11.7         | 6.4          | 3.7         | 2.1         | 3.4         |
|                            | [39.6, 60.4] | [2.9, 10.1]  | [10.1, 27.6] | [7.0, 18.8]  | [2.7, 14.5]  | [1.9, 7.2]  | [0.6, 6.8]  | [1.6, 7.0]  |
| South Sudan                | 39.4         | 10.2         | 12.2         | 10.8         | 11.1         | 7.4         | 4.6         | 4.4         |
|                            | [34.5, 44.5] | [8.1, 12.7]  | [9.9, 14.9]  | [8.9, 13.1]  | [9.2, 13.4]  | [6.0, 9.2]  | [3.4, 6.2]  | [3.2, 6.0]  |
| Sudan                      | 47.6         | 9.0          | 8.1          | 11.2         | 11.9         | 6.8         | 2.9         | 2.4         |
|                            | [43.4, 51.9] | [6.2, 13.0]  | [6.5, 10.2]  | [8.4, 14.8]  | [9.6, 14.5]  | [5.3, 8.8]  | [2.0, 4.3]  | [1.6, 3.6]  |
| Swaziland                  | 30.0         | 9.2          | 9.4          | 25.6         | 11.5         | 6.3         | 5.6         | 2.4         |

|                           |              |             |             |              |              |              |              |             |
|---------------------------|--------------|-------------|-------------|--------------|--------------|--------------|--------------|-------------|
|                           | [22.5, 38.9] | [5.1, 16.2] | [5.8, 15.1] | [20.2, 31.8] | [7.0, 18.2]  | [2.9, 13.2]  | [2.3, 13.1]  | [0.6, 8.8]  |
| Tanzania                  | 37.9         | 6.2         | 7.4         | 12.9         | 18.8         | 7.6          | 5.7          | 3.5         |
|                           | [32.8, 43.2] | [4.1, 9.4]  | [5.6, 9.7]  | [9.9, 16.6]  | [14.8, 23.6] | [5.7, 10.1]  | [4.2, 7.8]   | [2.1, 5.6]  |
| Uganda                    | 41.6         | 7.9         | 6.4         | 10.7         | 14.4         | 9.7          | 5.8          | 3.5         |
|                           | [39.0, 44.2] | [6.1, 10.1] | [4.9, 8.4]  | [8.5, 13.5]  | [12.4, 16.6] | [7.9, 11.8]  | [4.8, 7.1]   | [2.6, 4.7]  |
| Zambia                    | 45.4         | 9.0         | 5.5         | 9.3          | 12.6         | 8.4          | 6.0          | 3.7         |
|                           | [40.4, 50.5] | [6.3, 12.7] | [3.8, 8.0]  | [7.3, 11.9]  | [9.2, 17.0]  | [6.0, 11.7]  | [4.1, 8.7]   | [2.1, 6.2]  |
| Zimbabwe                  | 49.8         | 7.5         | 5.2         | 9.5          | 13.2         | 6.7          | 4.0          | 4.1         |
|                           | [44.3, 55.3] | [5.3, 10.7] | [3.6, 7.5]  | [6.7, 13.3]  | [9.9, 17.2]  | [4.5, 9.9]   | [2.3, 7.1]   | [2.6, 6.4]  |
| West & Central Africa     | 29.5         | 5.4         | 5.9         | 12.8         | 16.4         | 15.7         | 8.9          | 5.4         |
|                           | [28.4, 30.7] | [5.0, 5.8]  | [5.4, 6.5]  | [12.1, 13.5] | [15.6, 17.4] | [14.9, 16.5] | [8.4, 9.4]   | [5.0, 5.9]  |
| Benin                     | 31.2         | 5.9         | 6.0         | 14.1         | 13.8         | 12.7         | 11.0         | 5.4         |
|                           | [28.2, 34.4] | [4.3, 7.9]  | [4.7, 7.5]  | [11.9, 16.7] | [11.6, 16.4] | [11.0, 14.7] | [9.2, 13.0]  | [4.0, 7.1]  |
| Burkina Faso              | 21.8         | 5.2         | 7.0         | 16.6         | 18.8         | 16.0         | 9.0          | 5.5         |
|                           | [20.0, 23.8] | [4.2, 6.5]  | [5.7, 8.6]  | [14.9, 18.5] | [16.8, 21.0] | [14.4, 17.8] | [7.8, 10.4]  | [4.3, 6.9]  |
| Cameroon                  | 35.3         | 7.3         | 5.8         | 11.5         | 14.8         | 11.0         | 9.5          | 4.9         |
|                           | [31.3, 39.5] | [5.3, 10.1] | [4.3, 7.8]  | [9.4, 13.9]  | [12.2, 17.8] | [8.8, 13.6]  | [7.2, 12.4]  | [3.4, 7.0]  |
| Chad                      | 25.4         | 6.3         | 7.0         | 15.6         | 17.1         | 14.7         | 8.7          | 5.1         |
|                           | [23.0, 28.0] | [5.3, 7.5]  | [5.7, 8.5]  | [13.8, 17.6] | [15.0, 19.4] | [13.0, 16.7] | [7.2, 10.6]  | [4.1, 6.3]  |
| Congo                     | 31.8         | 6.4         | 8.7         | 11.3         | 16.2         | 12.6         | 8.0          | 5.1         |
|                           | [25.9, 38.3] | [4.2, 9.5]  | [5.8, 12.7] | [7.5, 16.7]  | [12.4, 21.0] | [9.4, 16.8]  | [5.4, 11.8]  | [3.2, 7.9]  |
| Congo (DR)                | 26.8         | 5.1         | 7.5         | 16.5         | 15.1         | 13.7         | 8.4          | 7.0         |
|                           | [23.9, 30.0] | [3.9, 6.6]  | [6.1, 9.3]  | [14.7, 18.6] | [12.8, 17.7] | [11.6, 16.1] | [6.9, 10.1]  | [5.4, 9.0]  |
| Cote D'Ivoire             | 34.6         | 6.8         | 8.2         | 12.5         | 15.0         | 11.8         | 7.0          | 4.0         |
|                           | [31.0, 38.4] | [5.2, 8.9]  | [6.3, 10.7] | [10.3, 15.2] | [12.4, 18.0] | [9.5, 14.4]  | [5.3, 9.4]   | [2.7, 5.8]  |
| Gabon                     | 40.7         | 2.5         | 5.4         | 17.1         | 11.1         | 9.7          | 7.9          | 5.4         |
|                           | [32.3, 49.7] | [1.2, 5.4]  | [3.3, 8.8]  | [12.8, 22.6] | [7.2, 16.7]  | [6.2, 14.9]  | [3.8, 15.8]  | [2.3, 12.3] |
| Gambia                    | 53.5         | 5.2         | 5.5         | 7.4          | 10.2         | 8.3          | 6.0          | 3.8         |
|                           | [47.0, 59.9] | [3.7, 7.3]  | [3.9, 7.8]  | [5.0, 10.7]  | [7.4, 14.1]  | [6.5, 10.6]  | [3.9, 9.1]   | [2.2, 6.4]  |
| Ghana                     | 47.9         | 5.3         | 7.0         | 8.6          | 9.1          | 8.0          | 7.3          | 6.6         |
|                           | [41.4, 54.5] | [3.3, 8.4]  | [3.9, 12.3] | [5.8, 12.8]  | [6.1, 13.5]  | [5.3, 12.0]  | [3.5, 14.5]  | [3.7, 11.6] |
| Guinea                    | 29.0         | 8.6         | 8.0         | 14.2         | 14.7         | 14.7         | 6.4          | 4.6         |
|                           | [25.4, 32.9] | [6.7, 10.9] | [6.0, 10.7] | [11.7, 17.0] | [12.1, 17.6] | [11.9, 18.0] | [4.8, 8.4]   | [3.3, 6.3]  |
| Liberia                   | 28.0         | 6.1         | 10.0        | 13.2         | 20.7         | 10.3         | 7.0          | 4.7         |
|                           | [24.0, 32.3] | [4.5, 8.2]  | [7.1, 13.9] | [10.2, 17.1] | [16.8, 25.3] | [7.8, 13.5]  | [4.7, 10.3]  | [2.9, 7.5]  |
| Mali                      | 32.2         | 5.2         | 5.8         | 10.6         | 15.0         | 15.9         | 9.3          | 6.0         |
|                           | [28.3, 36.3] | [4.0, 6.8]  | [4.3, 7.8]  | [8.9, 12.7]  | [12.6, 17.9] | [13.1, 19.2] | [7.3, 11.8]  | [4.8, 7.3]  |
| Mauritania                | 53.7         | 12.5        | 5.7         | 7.9          | 5.0          | 7.9          | 4.2          | 3.2         |
|                           | [48.9, 58.5] | [9.9, 15.7] | [3.8, 8.6]  | [5.7, 10.8]  | [3.0, 8.1]   | [5.7, 10.7]  | [2.0, 8.5]   | [1.9, 5.4]  |
| Niger                     | 19.0         | 4.6         | 4.4         | 11.8         | 20.3         | 19.7         | 12.0         | 8.1         |
|                           | [16.7, 21.5] | [3.5, 6.1]  | [3.3, 5.8]  | [10.1, 13.6] | [18.4, 22.5] | [17.6, 21.9] | [10.5, 13.8] | [6.7, 9.8]  |
| Nigeria                   | 29.7         | 4.9         | 4.8         | 11.5         | 17.5         | 17.5         | 9.0          | 5.0         |
|                           | [27.3, 32.3] | [4.3, 5.6]  | [4.2, 5.6]  | [10.2, 13.0] | [16.1, 19.0] | [16.0, 19.2] | [8.0, 10.2]  | [4.2, 6.0]  |
| Sao Tome & Principe       | 48.9         | 7.7         | 11.9        | 16.7         | 6.1          | 4.3          | 3.2          | 1.1         |
|                           | [37.3, 60.6] | [3.3, 16.9] | [6.2, 21.7] | [11.0, 24.7] | [2.6, 13.8]  | [1.6, 10.8]  | [1.1, 8.9]   | [0.2, 6.1]  |
| Senegal                   | 55.9         | 8.8         | 4.8         | 8.9          | 10.3         | 7.1          | 3.2          | 1.0         |
|                           | [48.9, 62.6] | [5.9, 12.8] | [2.4, 9.5]  | [6.0, 13.1]  | [7.3, 14.4]  | [3.9, 12.5]  | [1.9, 5.4]   | [0.4, 2.9]  |
| Sierra Leone              | 25.0         | 10.4        | 9.3         | 17.2         | 16.2         | 13.3         | 5.1          | 3.6         |
|                           | [21.1, 29.4] | [8.4, 12.7] | [7.4, 11.5] | [14.9, 19.6] | [14.1, 18.7] | [11.1, 15.7] | [3.8, 6.9]   | [2.6, 4.9]  |
| Togo                      | 38.5         | 4.4         | 6.1         | 9.4          | 9.2          | 14.6         | 13.0         | 4.7         |
|                           | [32.2, 45.2] | [2.3, 8.1]  | [4.1, 8.9]  | [6.5, 13.5]  | [5.6, 14.8]  | [11.5, 18.4] | [9.3, 17.9]  | [2.9, 7.6]  |
| Latin America & Caribbean | 49.1         | 11.2        | 8.7         | 11.0         | 10.3         | 5.0          | 3.2          | 1.6         |

|                               |              |             |              |              |              |              |             |             |
|-------------------------------|--------------|-------------|--------------|--------------|--------------|--------------|-------------|-------------|
|                               | [45.9, 52.2] | [9.6, 13.1] | [6.8, 10.9]  | [8.8, 13.7]  | [8.9, 12.0]  | [4.0, 6.2]   | [2.3, 4.4]  | [1.1, 2.3]  |
| Colombia                      | 52.3         | 12.8        | 10.0         | 10.1         | 8.8          | 3.3          | 1.3         | 1.4         |
|                               | [43.4, 60.9] | [8.0, 19.9] | [6.0, 16.1]  | [6.2, 16.1]  | [5.5, 13.8]  | [1.5, 7.2]   | [0.4, 3.6]  | [0.6, 3.2]  |
| Dominican Republic            | 70.1         | 6.5         | 4.5          | 7.7          | 4.2          | 2.7          | 1.5         | 2.8         |
|                               | [62.1, 76.9] | [4.4, 9.5]  | [2.1, 9.2]   | [4.7, 12.3]  | [1.8, 9.4]   | [1.2, 6.3]   | [0.6, 3.7]  | [0.9, 7.9]  |
| El Salvador                   | 55.4         | 13.3        | 8.2          | 10.6         | 7.2          | 4.5          | 0.8         | NA          |
|                               | [42.6, 67.5] | [6.1, 26.6] | [3.4, 18.2]  | [5.5, 19.4]  | [2.7, 17.8]  | [1.9, 10.5]  | [0.1, 5.3]  |             |
| Guatemala                     | 47.9         | 12.6        | 9.8          | 8.3          | 12.7         | 4.9          | 2.8         | 1.0         |
|                               | [42.2, 53.7] | [8.4, 18.5] | [6.8, 13.9]  | [5.7, 12.0]  | [9.6, 16.5]  | [3.2, 7.5]   | [1.6, 4.9]  | [0.4, 2.3]  |
| Guyana                        | 58.4         | 7.4         | 8.9          | 6.3          | 7.6          | 2.3          | 5.7         | 3.5         |
|                               | [45.9, 69.9] | [3.7, 14.0] | [4.1, 18.2]  | [2.7, 13.7]  | [2.3, 22.2]  | [0.6, 8.1]   | [1.2, 23.3] | [0.6, 16.8] |
| Haiti                         | 38.9         | 10.4        | 8.9          | 13.8         | 13.5         | 7.6          | 5.2         | 1.7         |
|                               | [32.8, 45.3] | [8.0, 13.4] | [5.9, 13.4]  | [10.5, 18.1] | [10.5, 17.1] | [5.2, 11.0]  | [3.1, 8.5]  | [0.9, 3.1]  |
| Honduras                      | 60.7         | 6.2         | 6.1          | 8.3          | 9.1          | 3.7          | 3.6         | 2.3         |
|                               | [53.0, 68.0] | [4.4, 8.7]  | [3.8, 9.7]   | [5.5, 12.2]  | [6.2, 13.2]  | [2.0, 6.8]   | [1.8, 7.3]  | [1.1, 4.5]  |
| Paraguay                      | 32.5         | 19.0        | 22.8         | 19.7         | 1.7          | 2.6          | 1.0         | 0.7         |
|                               | [20.5, 47.4] | [7.1, 42.0] | [11.8, 39.3] | [7.3, 43.2]  | [0.4, 6.4]   | [0.7, 9.2]   | [0.2, 5.8]  | [0.1, 8.1]  |
| Peru                          | 49.6         | 13.4        | 6.5          | 11.5         | 10.0         | 4.5          | 3.0         | 1.6         |
|                               | [42.0, 57.2] | [8.6, 20.2] | [3.3, 12.4]  | [5.4, 22.9]  | [5.8, 16.5]  | [2.3, 8.8]   | [1.1, 7.7]  | [0.6, 4.2]  |
| Suriname                      | 63.8         | 7.2         | 6.8          | 11.6         | 2.4          | 1.4          | 6.8         | NA          |
|                               | [44.1, 79.7] | [1.8, 25.2] | [1.5, 25.4]  | [3.6, 31.8]  | [0.7, 7.7]   | [0.2, 8.6]   | [2.1, 19.7] |             |
| Low-Income Countries          | 33.7         | 7.9         | 7.4          | 13.7         | 14.0         | 11.4         | 7.1         | 4.9         |
|                               | [32.2, 35.1] | [7.3, 8.6]  | [6.7, 8.0]   | [12.9, 14.5] | [13.3, 14.8] | [10.6, 12.2] | [6.6, 7.6]  | [4.4, 5.4]  |
| Lower-Middle-Income Countries | 46.9         | 7.9         | 6.2          | 9.8          | 11.1         | 8.7          | 5.9         | 3.4         |
|                               | [45.7, 48.0] | [7.4, 8.4]  | [5.8, 6.6]   | [9.3, 10.4]  | [10.6, 11.7] | [8.3, 9.3]   | [5.5, 6.3]  | [3.1, 3.7]  |
| Upper-Middle-Income Countries | 50.3         | 8.6         | 9.3          | 11.8         | 9.1          | 4.2          | 4.5         | 2.2         |
|                               | [46.9, 53.7] | [7.1, 10.3] | [7.7, 11.2]  | [9.4, 14.7]  | [7.6, 10.8]  | [3.3, 5.3]   | [3.3, 6.0]  | [1.5, 3.1]  |

Notes: 95% confidence intervals are shown in brackets.

**eTable 4. Component Mortality Probabilities for Pooled Sample**

| Age interval | Weighted cases (unweighted) |                          |                       | Weighted deaths (unweighted) |                      |                  | Component probability | 1-Component probability |
|--------------|-----------------------------|--------------------------|-----------------------|------------------------------|----------------------|------------------|-----------------------|-------------------------|
|              | Cohort A                    | Cohort B                 | Cohort C              | Cohort A                     | Cohort B             | Cohort C         |                       |                         |
| < 1 month    | 2,671.6<br>(17,086)         | 614,416.1<br>(1,987,110) | 2,734.0<br>(17,589)   | 186.0<br>(536)               | 17,364.3<br>(51,975) | 82.8<br>(491)    | 0.0284                | 0.9716                  |
| 1-2 months   | 5,270.7<br>(34,794)         | 591,812.9<br>(1,917,439) | 5,252.0<br>(34,193)   | 68.9<br>(215)                | 3,255.4<br>(10,973)  | 23.8<br>(185)    | 0.0056                | 0.9944                  |
| 3-5 months   | 8,049.0<br>(52,289)         | 582,915.6<br>(1,888,185) | 7,733.1<br>(49,373)   | 82.8<br>(282)                | 2,775.1<br>(9,251)   | 45.8<br>(291)    | 0.0049                | 0.9951                  |
| 6-11 months  | 15,158.2<br>(98,992)        | 565,198.7<br>(1,829,024) | 13,605.6<br>(87,175)  | 183.1<br>(606)               | 4,396.6<br>(14,169)  | 132.4<br>(847)   | 0.0079                | 0.9921                  |
| 12-23 months | 29,615.2<br>(191,907)       | 528,518.0<br>(1,709,276) | 24,705.4<br>(157,624) | 299.9<br>(934)               | 4,203.2<br>(12,857)  | 229.2<br>(1,473) | 0.0081                | 0.9919                  |
| 24-35 months | 29,204.3<br>(191,912)       | 514,858.7<br>(1,660,658) | 26,780.8<br>(170,080) | 242.8<br>(788)               | 3,166.7<br>(9,680)   | 183.0<br>(1,145) | 0.0063                | 0.9937                  |
| 36-47 months | 29,931.7<br>(195,287)       | 505,024.4<br>(1,624,626) | 24,285.2<br>(153,690) | 182.8<br>(600)               | 2,055.3<br>(6,284)   | 125.8<br>(709)   | 0.0042                | 0.9958                  |
| 48-59 months | 29,150.3<br>(188,737)       | 492,987.4<br>(1,582,586) | 22,993.9<br>(145,590) | 118.6<br>(380)               | 1,153.3<br>(3,616)   | 64.3<br>(388)    | 0.0025                | 0.9975                  |
|              |                             |                          |                       |                              |                      |                  |                       | U5MR=66                 |

Notes: Unweighted cases and deaths are shown in parentheses below weighted cases and deaths. Acronyms: under-5 mortality rate (U5MR).



**eTable 5. Mortality and the Share of Deaths Among Children Younger Than 5 Years by Age**

|                           | Mortality (deaths per 1000) |             |             |             |              | Share (%)   |             |             |              |
|---------------------------|-----------------------------|-------------|-------------|-------------|--------------|-------------|-------------|-------------|--------------|
|                           | 0–59 months                 | 0–23 months | Neonates    | 1–23 months | 24–59 months | 0–23 months | Neonates    | 1–23 months | 24–59 months |
| Pooled                    | 66.1                        | 53.9        | 28.4        | 25.5        | 12.2         | 81.5        | 43.0        | 38.5        | 18.5         |
|                           | [65.1,67.1]                 | [53.1,54.8] | [27.9,29.0] | [24.9,26.1] | [11.8,12.6]  | [81.0,82.0] | [42.4,43.7] | [37.9,39.1] | [18.0,19.0]  |
| Least Developed Countries | 81.2                        | 64.1        | 29.4        | 34.8        | 17.1         | 79.0        | 36.2        | 42.8        | 21.0         |
|                           | [79.6,82.8]                 | [62.8,65.5] | [28.5,30.2] | [33.8,35.7] | [16.5,17.6]  | [78.4,79.6] | [35.4,37.0] | [42.0,43.6] | [20.4,21.6]  |
| East Asia & Pacific       | 37.8                        | 33.0        | 18.3        | 14.7        | 4.8          | 87.4        | 48.5        | 38.9        | 12.6         |
|                           | [35.8,39.8]                 | [31.2,34.9] | [17.1,19.5] | [13.6,15.9] | [4.1,5.5]    | [85.7,88.9] | [46.3,50.7] | [37.0,40.9] | [11.1,14.3]  |
| Cambodia                  | 47.7                        | 41.9        | 21.1        | 20.8        | 5.9          | 87.7        | 44.2        | 43.5        | 12.3         |
|                           | [42.2,54.0]                 | [36.6,47.9] | [18.2,24.4] | [17.4,24.8] | [4.6,7.5]    | [84.5,90.3] | [40.2,48.3] | [39.2,47.8] | [9.7,15.5]   |
| Indonesia                 | 34.0                        | 29.8        | 17.3        | 12.5        | 4.2          | 87.6        | 50.9        | 36.7        | 12.4         |
|                           | [31.9,36.3]                 | [28.0,31.8] | [16.1,18.6] | [11.2,13.9] | [3.2,5.5]    | [84.4,90.2] | [47.8,54.0] | [33.7,39.7] | [9.8,15.6]   |
| Lao                       | 49.3                        | 45.0        | 20.3        | 24.7        | 4.3          | 91.3        | 41.2        | 50.1        | 8.7          |
|                           | [45.1,53.9]                 | [40.9,49.5] | [17.8,23.2] | [21.8,27.9] | [3.6,5.2]    | [89.5,92.8] | [37.3,45.2] | [46.3,53.8] | [7.2,10.5]   |
| Mongolia                  | 18.2                        | 15.2        | 8.0         | 7.2         | 3.0          | 83.5        | 43.9        | 39.6        | 16.5         |
|                           | [15.2,21.9]                 | [12.3,18.7] | [6.1,10.4]  | [5.5,9.5]   | [1.8,4.9]    | [74.6,89.7] | [35.3,52.8] | [32.6,47.1] | [10.3,25.4]  |
| Myanmar                   | 71.9                        | 63.2        | 31.9        | 31.3        | 8.7          | 88.0        | 44.4        | 43.5        | 12.0         |
|                           | [64.0,80.6]                 | [56.3,70.9] | [27.7,36.7] | [26.0,37.6] | [6.7,11.2]   | [85.1,90.4] | [38.6,50.4] | [38.7,48.5] | [9.6,14.9]   |
| Papua New Guinea          | 51.9                        | 41.9        | 23.7        | 18.2        | 10.0         | 80.7        | 45.7        | 35.1        | 19.3         |
|                           | [46.6,57.7]                 | [37.2,47.2] | [20.9,26.9] | [14.5,22.9] | [7.6,13.1]   | [75.8,84.9] | [39.7,51.7] | [29.7,40.8] | [15.1,24.2]  |
| Philippines               | 28.0                        | 24.4        | 13.8        | 10.6        | 3.6          | 87.2        | 49.4        | 37.8        | 12.8         |
|                           | [24.9,31.4]                 | [21.5,27.6] | [11.6,16.4] | [9.0,12.5]  | [2.7,4.7]    | [83.6,90.1] | [44.1,54.6] | [33.0,42.9] | [9.9,16.4]   |
| Timor-Leste               | 40.6                        | 32.6        | 16.9        | 15.7        | 8.0          | 80.2        | 41.6        | 38.6        | 19.8         |
|                           | [36.7,45.0]                 | [29.4,36.1] | [14.2,20.2] | [13.6,18.1] | [6.3,10.3]   | [75.7,84.0] | [36.2,47.2] | [33.4,44.1] | [16.0,24.3]  |
| Tonga                     | 11.2                        | 10.5        | 5.1         | 5.3         | 0.8          | 93.2        | 45.6        | 47.6        | 6.8          |
|                           | [7.8,16.2]                  | [7.0,15.6]  | [3.5,7.4]   | [2.8,10.1]  | [0.2,2.8]    | [75.6,98.4] | [31.0,60.9] | [29.9,65.9] | [1.6,24.4]   |
| South Asia                | 54.8                        | 49.0        | 31.7        | 17.3        | 5.8          | 89.4        | 57.7        | 31.6        | 10.6         |
|                           | [53.6,56.1]                 | [47.8,50.3] | [30.7,32.6] | [16.6,18.1] | [5.6,6.1]    | [88.9,89.8] | [56.7,58.8] | [30.6,32.7] | [10.2,11.1]  |
| Afghanistan               | 62.0                        | 55.5        | 24.9        | 30.6        | 6.5          | 89.5        | 40.1        | 49.4        | 10.5         |
|                           | [56.9,67.6]                 | [50.8,60.6] | [22.5,27.4] | [27.3,34.4] | [5.6,7.7]    | [88.0,90.8] | [37.1,43.1] | [46.6,52.1] | [9.2,12.0]   |
| Bangladesh                | 40.5                        | 36.1        | 25.9        | 10.1        | 4.5          | 89.0        | 64.0        | 25.0        | 11.0         |
|                           | [38.6,42.5]                 | [34.2,38.0] | [24.4,27.6] | [8.9,11.5]  | [3.9,5.2]    | [87.3,90.4] | [61.1,66.7] | [22.3,27.9] | [9.6,12.7]   |
| India                     | 52.2                        | 46.4        | 30.5        | 15.9        | 5.8          | 88.8        | 58.4        | 30.4        | 11.2         |
|                           | [51.4,53.0]                 | [45.6,47.2] | [29.7,31.3] | [15.4,16.3] | [5.6,6.0]    | [88.4,89.3] | [57.5,59.4] | [29.6,31.3] | [10.7,11.6]  |
| Maldives                  | 21.6                        | 19.4        | 12.6        | 6.8         | 2.2          | 89.6        | 58.3        | 31.3        | 10.4         |
|                           | [17.5,26.7]                 | [15.3,24.5] | [9.6,16.5]  | [3.8,11.9]  | [1.2,4.2]    | [81.2,94.5] | [43.7,71.7] | [19.3,46.4] | [5.5,18.8]   |
| Nepal                     | 32.9                        | 29.3        | 17.7        | 11.6        | 3.6          | 89.1        | 53.8        | 35.3        | 10.9         |
|                           | [28.9,37.4]                 | [25.4,33.7] | [14.9,20.9] | [9.5,14.2]  | [2.3,5.6]    | [83.5,92.9] | [48.1,59.4] | [30.1,40.9] | [7.1,16.5]   |
| Pakistan                  | 74.2                        | 67.5        | 42.4        | 25.1        | 6.7          | 91.0        | 57.1        | 33.8        | 9.0          |
|                           | [67.7,81.3]                 | [61.5,74.1] | [38.6,46.5] | [21.3,29.6] | [5.5,8.2]    | [89.2,92.5] | [53.3,60.8] | [30.2,37.7] | [7.5,10.8]   |
| Europe & Central Asia     | 22.7                        | 20.8        | 11.1        | 9.7         | 1.9          | 91.5        | 49.0        | 42.6        | 8.5          |
|                           | [19.8,26.0]                 | [18.0,23.9] | [9.4,13.1]  | [7.9,11.8]  | [1.3,2.9]    | [87.5,94.4] | [43.2,54.8] | [37.5,47.8] | [5.6,12.5]   |
| Albania                   | 5.8                         | 5.7         | 3.4         | 2.3         | 0.1          | 97.8        | 58.3        | 39.5        | 2.2          |
|                           | [3.7,9.0]                   | [3.6,8.9]   | [1.8,6.3]   | [1.0,5.1]   | [0.0,0.7]    | [85.9,99.7] | [32.7,80.1] | [18.2,65.7] | [0.3,14.1]   |
| Armenia                   | 10.5                        | 9.6         | 5.3         | 4.3         | 0.9          | 91.4        | 50.7        | 40.7        | 8.6          |
|                           | [7.6,14.6]                  | [7.0,13.2]  | [3.3,8.5]   | [2.4,7.5]   | [0.3,2.6]    | [78.3,96.9] | [31.7,69.5] | [24.1,59.8] | [3.1,21.7]   |
| Kyrgyz Republic           | 22.3                        | 20.6        | 14.2        | 6.4         | 1.7          | 92.4        | 63.6        | 28.9        | 7.6          |
|                           | [18.4,26.9]                 | [16.5,25.6] | [10.4,19.2] | [4.4,9.4]   | [0.9,3.2]    | [85.1,96.3] | [51.1,74.4] | [19.3,40.7] | [3.7,14.9]   |
| Moldova                   | 15.7                        | 14.9        | 11.8        | 3.0         | 0.9          | 94.4        | 75.2        | 19.1        | 5.6          |
|                           | [11.4,21.8]                 | [10.9,20.2] | [8.5,16.6]  | [1.5,6.0]   | [0.2,3.4]    | [80.5,98.5] | [61.1,85.5] | [9.8,33.8]  | [1.5,19.5]   |
| Tajikistan                | 33.3                        | 30.3        | 14.9        | 15.4        | 3.1          | 90.7        | 44.6        | 46.1        | 9.3          |

|                            |               |             |             |             |             |             |             |             |             |
|----------------------------|---------------|-------------|-------------|-------------|-------------|-------------|-------------|-------------|-------------|
|                            | [30.3,36.7]   | [27.6,33.2] | [12.6,17.5] | [13.0,18.1] | [2.0,4.8]   | [86.2,93.9] | [38.1,51.3] | [39.9,52.5] | [6.1,13.8]  |
| Turkey                     | 20.1          | 18.5        | 9.3         | 9.2         | 1.6         | 92.1        | 46.3        | 45.7        | 7.9         |
|                            | [16.3,24.7]   | [14.8,23.0] | [7.0,12.3]  | [6.7,12.6]  | [0.8,3.2]   | [84.4,96.1] | [36.4,56.5] | [37.0,54.8] | [3.9,15.6]  |
| Turkmenistan               | 35.8          | 31.4        | 19.3        | 12.1        | 4.4         | 87.8        | 54.0        | 33.9        | 12.2        |
|                            | [30.9,41.4]   | [27.0,36.5] | [15.9,23.4] | [9.3,15.8]  | [3.0,6.4]   | [82.9,91.4] | [46.7,61.0] | [26.8,41.7] | [8.6,17.1]  |
| Middle East & North Africa | 32.1          | 29.3        | 16.5        | 12.8        | 2.8         | 91.3        | 51.4        | 39.9        | 8.7         |
|                            | [30.3,33.9]   | [27.5,31.2] | [15.1,17.9] | [12.0,13.7] | [2.4,3.2]   | [90.0,92.5] | [49.1,53.7] | [37.9,41.9] | [7.5,10.0]  |
| Egypt                      | 30.3          | 27.7        | 16.3        | 11.4        | 2.6         | 91.6        | 53.8        | 37.7        | 8.4         |
|                            | [27.8,32.9]   | [25.2,30.4] | [14.5,18.3] | [10.0,13.0] | [2.0,3.3]   | [89.0,93.5] | [50.2,57.4] | [34.1,41.5] | [6.5,11.0]  |
| Iraq                       | 24.5          | 22.1        | 12.9        | 9.2         | 2.3         | 90.4        | 52.7        | 37.7        | 9.6         |
|                            | [21.4,28.0]   | [19.3,25.4] | [11.0,15.1] | [7.8,11.0]  | [1.7,3.2]   | [87.4,92.8] | [48.6,56.8] | [33.6,42.1] | [7.2,12.6]  |
| Jordan                     | 16.7          | 15.4        | 9.3         | 6.2         | 1.3         | 92.2        | 55.4        | 36.8        | 7.8         |
|                            | [13.9,20.0]   | [12.8,18.6] | [7.4,11.6]  | [4.6,8.3]   | [0.8,2.2]   | [87.4,95.2] | [46.4,64.0] | [29.0,45.3] | [4.8,12.6]  |
| State of Palestine         | 22.8          | 20.7        | 11.5        | 9.2         | 2.1         | 90.6        | 50.2        | 40.4        | 9.4         |
|                            | [20.1,26.0]   | [17.9,23.9] | [9.7,13.6]  | [7.4,11.4]  | [1.5,3.2]   | [86.1,93.7] | [44.2,56.1] | [34.8,46.2] | [6.3,13.9]  |
| Tunisia                    | 15.8          | 14.6        | 9.5         | 5.1         | 1.3         | 92.0        | 59.8        | 32.2        | 8.0         |
|                            | [13.0,19.3]   | [11.7,18.1] | [7.3,12.3]  | [3.5,7.4]   | [0.7,2.3]   | [85.5,95.7] | [47.7,70.8] | [23.5,42.3] | [4.3,14.5]  |
| Yemen                      | 57.5          | 52.6        | 26.5        | 26.1        | 5.0         | 91.4        | 46.1        | 45.3        | 8.6         |
|                            | [53.4,62.0]   | [48.8,56.6] | [24.1,29.2] | [23.5,28.8] | [3.8,6.4]   | [89.2,93.2] | [43.1,49.2] | [42.1,48.5] | [6.8,10.8]  |
| Eastern & Southern Africa  | 73.8          | 60.5        | 29.1        | 31.4        | 13.3        | 82.0        | 39.4        | 42.6        | 18.0        |
|                            | [71.7,76.0]   | [58.7,62.4] | [27.8,30.4] | [30.2,32.7] | [12.5,14.2] | [81.0,82.9] | [38.0,40.9] | [41.4,43.8] | [17.1,19.0] |
| Angola                     | 79.7          | 59.8        | 24.4        | 35.4        | 19.9        | 75.0        | 30.6        | 44.4        | 25.0        |
|                            | [72.4,87.7]   | [54.0,66.1] | [21.3,28.0] | [31.4,39.9] | [17.0,23.4] | [71.9,77.9] | [27.6,33.9] | [41.2,47.6] | [22.1,28.1] |
| Burundi                    | 82.0          | 62.2        | 25.0        | 37.3        | 19.8        | 75.9        | 30.5        | 45.4        | 24.1        |
|                            | [78.3,85.9]   | [58.5,66.2] | [22.3,27.9] | [34.9,39.7] | [17.8,21.9] | [73.3,78.3] | [27.8,33.3] | [43.2,47.6] | [21.7,26.7] |
| Comoros                    | 49.8          | 41.7        | 25.4        | 16.3        | 8.0         | 83.9        | 51.0        | 32.8        | 16.1        |
|                            | [42.0,58.9]   | [34.9,49.8] | [20.6,31.3] | [12.2,21.8] | [5.6,11.5]  | [78.3,88.2] | [43.9,58.1] | [26.0,40.5] | [11.8,21.7] |
| Ethiopia                   | 81.5          | 68.5        | 38.0        | 30.5        | 13.0        | 84.0        | 46.7        | 37.4        | 16.0        |
|                            | [75.4,88.0]   | [63.8,73.5] | [34.3,42.2] | [26.7,34.7] | [10.7,15.8] | [81.5,86.3] | [42.4,51.0] | [33.5,41.4] | [13.7,18.5] |
| Kenya                      | 56.0          | 46.9        | 22.9        | 23.9        | 9.1         | 83.7        | 41.0        | 42.7        | 16.3        |
|                            | [53.2,59.0]   | [44.2,49.7] | [21.0,25.1] | [21.8,26.3] | [7.7,10.8]  | [81.0,86.1] | [37.6,44.4] | [39.7,45.9] | [13.9,19.0] |
| Lesotho                    | 86.4          | 76.8        | 41.5        | 35.3        | 9.5         | 89.0        | 48.0        | 40.9        | 11.0        |
|                            | [75.5,98.6]   | [67.4,87.4] | [33.8,50.9] | [29.4,42.5] | [6.0,15.1]  | [83.6,92.7] | [41.1,55.1] | [34.2,48.0] | [7.3,16.4]  |
| Madagascar                 | 60.2          | 45.0        | 21.7        | 23.3        | 15.2        | 74.8        | 36.0        | 38.8        | 25.2        |
|                            | [56.1,64.6]   | [41.7,48.6] | [19.6,24.0] | [20.7,26.3] | [13.3,17.3] | [72.1,77.3] | [32.9,39.3] | [35.5,42.2] | [22.7,27.9] |
| Malawi                     | 74.8          | 57.2        | 26.5        | 30.7        | 17.5        | 76.5        | 35.5        | 41.1        | 23.5        |
|                            | [70.8,78.9]   | [53.9,60.8] | [23.9,29.4] | [28.7,32.9] | [15.4,20.0] | [73.8,79.0] | [32.6,38.5] | [38.7,43.5] | [21.0,26.2] |
| Mozambique                 | 108.1         | 85.4        | 32.0        | 53.4        | 22.7        | 79.0        | 29.6        | 49.4        | 21.0        |
|                            | [101.8,114.8] | [80.0,91.1] | [28.8,35.5] | [49.4,57.8] | [19.8,26.0] | [76.5,81.3] | [27.2,32.1] | [46.6,52.2] | [18.7,23.5] |
| Namibia                    | 58.8          | 48.4        | 18.7        | 29.7        | 10.5        | 82.2        | 31.8        | 50.4        | 17.8        |
|                            | [53.3,64.9]   | [43.1,54.3] | [15.3,22.9] | [26.3,33.5] | [8.4,13.1]  | [77.9,85.8] | [27.3,36.6] | [45.7,55.2] | [14.2,22.1] |
| Rwanda                     | 67.1          | 51.8        | 22.2        | 29.5        | 15.3        | 77.2        | 33.1        | 44.0        | 22.8        |
|                            | [62.3,72.2]   | [47.8,56.1] | [19.9,24.8] | [26.7,32.7] | [13.5,17.4] | [74.7,79.4] | [30.3,36.1] | [41.3,46.7] | [20.6,25.3] |
| South Africa               | 50.6          | 46.7        | 24.7        | 22.0        | 3.9         | 92.4        | 48.8        | 43.5        | 7.6         |
|                            | [43.1,59.4]   | [39.3,55.4] | [19.5,31.3] | [17.7,27.4] | [2.8,5.3]   | [89.3,94.6] | [41.6,56.1] | [36.7,50.6] | [5.4,10.7]  |
| South Sudan                | 96.6          | 78.9        | 35.9        | 43.1        | 17.6        | 81.8        | 37.1        | 44.6        | 18.2        |
|                            | [88.5,105.2]  | [72.2,86.2] | [31.1,41.4] | [38.0,48.8] | [14.9,20.9] | [79.1,84.1] | [32.7,41.8] | [40.7,48.6] | [15.9,20.9] |
| Sudan                      | 68.9          | 59.7        | 30.4        | 29.3        | 9.2         | 86.7        | 44.1        | 42.6        | 13.3        |
|                            | [65.3,72.7]   | [56.6,63.0] | [27.9,33.1] | [27.0,31.8] | [7.8,10.8]  | [84.7,88.4] | [41.0,47.3] | [39.9,45.2] | [11.6,15.3] |
| Swaziland                  | 79.3          | 68.9        | 18.4        | 50.5        | 10.4        | 86.9        | 23.3        | 63.6        | 13.1        |
|                            | [66.6,94.2]   | [57.4,82.6] | [14.0,24.2] | [41.2,61.8] | [7.1,15.2]  | [81.7,90.8] | [18.3,29.1] | [58.5,68.5] | [9.2,18.3]  |
| Tanzania                   | 78.1          | 64.7        | 29.0        | 35.7        | 13.4        | 82.9        | 37.2        | 45.7        | 17.1        |
|                            | [72.6,83.9]   | [60.1,69.6] | [26.2,32.1] | [32.1,39.6] | [11.3,15.8] | [80.3,85.2] | [34.1,40.4] | [42.5,48.9] | [14.8,19.7] |

|                           |               |               |             |             |             |             |             |             |             |
|---------------------------|---------------|---------------|-------------|-------------|-------------|-------------|-------------|-------------|-------------|
| Uganda                    | 73.2          | 59.0          | 27.4        | 31.6        | 14.2        | 80.6        | 37.4        | 43.2        | 19.4        |
|                           | [68.8,77.9]   | [55.4,62.9]   | [25.3,29.7] | [29.2,34.2] | [12.6,16.0] | [78.6,82.4] | [35.5,39.5] | [40.9,45.4] | [17.6,21.4] |
| Zambia                    | 64.3          | 51.4          | 25.0        | 26.4        | 12.9        | 79.9        | 38.9        | 41.1        | 20.1        |
|                           | [58.1,71.0]   | [46.2,57.1]   | [21.8,28.6] | [23.4,29.8] | [11.1,15.0] | [77.5,82.2] | [35.5,42.4] | [38.2,43.9] | [17.8,22.5] |
| Zimbabwe                  | 72.7          | 61.2          | 31.5        | 29.7        | 11.5        | 84.1        | 43.3        | 40.9        | 15.9        |
|                           | [65.6,80.5]   | [55.9,66.8]   | [27.6,35.8] | [25.8,34.2] | [8.9,15.0]  | [80.8,86.9] | [38.8,47.9] | [36.5,45.4] | [13.1,19.2] |
| West & Central Africa     | 116.0         | 81.9          | 33.5        | 48.4        | 34.0        | 70.7        | 28.9        | 41.7        | 29.3        |
|                           | [113.2,118.7] | [80.1,83.8]   | [32.4,34.7] | [47.0,49.8] | [32.7,35.4] | [69.9,71.4] | [28.2,29.7] | [40.8,42.6] | [28.6,30.1] |
| Benin                     | 102.1         | 73.8          | 32.5        | 41.2        | 28.3        | 72.3        | 31.9        | 40.4        | 27.7        |
|                           | [96.2,108.2]  | [69.0,78.8]   | [29.6,35.8] | [37.8,44.9] | [25.6,31.3] | [69.9,74.5] | [29.5,34.3] | [37.9,42.9] | [25.5,30.1] |
| Burkina Faso              | 147.7         | 105.6         | 34.3        | 71.2        | 42.1        | 71.5        | 23.2        | 48.2        | 28.5        |
|                           | [140.2,155.4] | [100.1,111.3] | [31.6,37.3] | [66.9,75.9] | [39.1,45.4] | [70.1,72.9] | [21.8,24.8] | [46.3,50.2] | [27.1,29.9] |
| Cameroon                  | 89.5          | 65.1          | 29.7        | 35.3        | 24.5        | 72.7        | 33.2        | 39.5        | 27.3        |
|                           | [83.0,96.5]   | [60.2,70.3]   | [26.5,33.3] | [31.8,39.3] | [21.6,27.7] | [70.2,75.0] | [30.2,36.3] | [36.4,42.7] | [25.0,29.8] |
| Chad                      | 147.8         | 107.7         | 36.2        | 71.5        | 40.1        | 72.9        | 24.5        | 48.4        | 27.1        |
|                           | [135.5,161.1] | [94.8,122.1]  | [32.5,40.4] | [61.7,82.7] | [37.8,42.6] | [69.6,75.9] | [23.1,26.0] | [45.2,51.5] | [24.1,30.4] |
| Congo                     | 81.8          | 59.5          | 24.3        | 35.2        | 22.3        | 72.8        | 29.8        | 43.0        | 27.2        |
|                           | [74.9,89.2]   | [53.6,66.0]   | [20.6,28.8] | [31.0,39.9] | [19.3,25.7] | [69.2,76.1] | [25.8,34.1] | [39.3,46.8] | [23.9,30.8] |
| Congo (DR)                | 111.6         | 81.8          | 30.2        | 51.7        | 29.8        | 73.3        | 27.0        | 46.3        | 26.7        |
|                           | [105.0,118.5] | [77.0,86.9]   | [27.1,33.6] | [47.8,55.8] | [26.7,33.1] | [71.3,75.3] | [24.7,29.5] | [43.6,49.0] | [24.7,28.7] |
| Cote D'Ivoire             | 101.1         | 79.5          | 35.4        | 44.0        | 21.7        | 78.6        | 35.0        | 43.5        | 21.4        |
|                           | [94.4,108.3]  | [73.9,85.4]   | [32.1,39.1] | [39.7,48.8] | [18.6,25.3] | [75.6,81.2] | [32.2,38.0] | [40.3,46.8] | [18.8,24.4] |
| Gabon                     | 63.3          | 50.2          | 25.3        | 24.9        | 13.1        | 79.3        | 40.0        | 39.3        | 20.7        |
|                           | [56.7,70.6]   | [43.8,57.5]   | [20.2,31.6] | [20.7,30.0] | [10.5,16.2] | [74.5,83.5] | [33.3,47.1] | [33.4,45.6] | [16.5,25.5] |
| Gambia                    | 59.2          | 48.2          | 29.3        | 18.9        | 11.0        | 81.4        | 49.5        | 31.9        | 18.6        |
|                           | [54.4,64.3]   | [44.3,52.4]   | [26.0,33.1] | [17.0,20.9] | [9.1,13.2]  | [78.4,84.1] | [46.0,53.1] | [28.7,35.2] | [15.9,21.6] |
| Ghana                     | 70.1          | 55.0          | 30.9        | 24.1        | 15.1        | 78.5        | 44.0        | 34.5        | 21.5        |
|                           | [63.8,76.8]   | [50.3,60.1]   | [26.5,35.9] | [20.9,27.8] | [11.8,19.2] | [74.0,82.4] | [39.3,48.9] | [29.5,39.7] | [17.6,26.0] |
| Guinea                    | 108.5         | 80.2          | 33.4        | 46.9        | 28.2        | 74.0        | 30.8        | 43.2        | 26.0        |
|                           | [99.1,118.6]  | [72.8,88.3]   | [29.6,37.7] | [41.0,53.5] | [25.0,31.8] | [71.8,76.1] | [27.7,34.0] | [39.8,46.6] | [23.9,28.2] |
| Liberia                   | 112.9         | 89.3          | 33.7        | 55.5        | 23.7        | 79.0        | 29.9        | 49.2        | 21.0        |
|                           | [102.1,124.7] | [80.6,98.7]   | [28.3,40.1] | [50.1,61.5] | [19.9,28.1] | [76.3,81.5] | [26.7,33.2] | [45.0,53.3] | [18.5,23.7] |
| Mali                      | 112.8         | 76.3          | 34.4        | 41.9        | 36.5        | 67.7        | 30.5        | 37.2        | 32.3        |
|                           | [103.8,122.5] | [69.7,83.6]   | [29.8,39.6] | [37.6,46.7] | [32.7,40.7] | [65.2,70.0] | [27.1,34.1] | [34.5,39.9] | [30.0,34.8] |
| Mauritania                | 52.7          | 44.4          | 27.6        | 16.9        | 8.2         | 84.4        | 52.3        | 32.1        | 15.6        |
|                           | [47.7,58.1]   | [40.0,49.3]   | [24.2,31.4] | [14.7,19.4] | [6.8,9.9]   | [81.6,86.8] | [48.3,56.3] | [28.6,35.8] | [13.2,18.4] |
| Niger                     | 153.0         | 97.5          | 31.5        | 66.0        | 55.6        | 63.7        | 20.6        | 43.1        | 36.3        |
|                           | [146.7,159.6] | [92.4,102.8]  | [28.8,34.5] | [61.1,71.2] | [51.9,59.5] | [61.6,65.7] | [18.7,22.6] | [40.9,45.3] | [34.3,38.4] |
| Nigeria                   | 128.8         | 87.9          | 36.9        | 51.0        | 40.9        | 68.2        | 28.6        | 39.6        | 31.8        |
|                           | [122.0,135.9] | [83.3,92.7]   | [33.8,40.2] | [48.1,54.1] | [37.8,44.3] | [66.7,69.7] | [26.8,30.5] | [38.0,41.3] | [30.3,33.3] |
| Sao Tome & Principe       | 43.0          | 35.7          | 18.1        | 17.6        | 7.3         | 83.1        | 42.1        | 41.0        | 16.9        |
|                           | [35.2,52.5]   | [29.0,44.0]   | [13.1,25.0] | [13.6,22.8] | [4.7,11.3]  | [75.4,88.7] | [33.2,51.4] | [32.0,50.6] | [11.3,24.6] |
| Senegal                   | 48.4          | 40.5          | 23.9        | 16.6        | 7.9         | 83.7        | 49.4        | 34.3        | 16.3        |
|                           | [43.3,54.2]   | [36.0,45.6]   | [20.7,27.6] | [14.3,19.4] | [6.0,10.3]  | [79.5,87.2] | [44.7,54.1] | [30.7,38.2] | [12.8,20.5] |
| Sierra Leone              | 124.3         | 96.2          | 29.6        | 66.6        | 28.0        | 77.4        | 23.8        | 53.6        | 22.6        |
|                           | [117.5,131.4] | [90.5,102.3]  | [26.8,32.8] | [61.8,71.7] | [25.1,31.3] | [75.2,79.5] | [21.7,26.1] | [51.2,55.9] | [20.5,24.8] |
| Togo                      | 74.5          | 51.0          | 27.9        | 23.0        | 23.5        | 68.4        | 37.5        | 30.9        | 31.6        |
|                           | [67.8,81.9]   | [45.5,57.1]   | [23.7,32.9] | [19.7,26.9] | [19.4,28.5] | [63.3,73.1] | [32.8,42.5] | [26.8,35.4] | [26.9,36.7] |
| Latin America & Caribbean | 32.0          | 28.6          | 15.5        | 13.1        | 3.4         | 89.3        | 48.3        | 40.9        | 10.7        |
|                           | [30.5,33.6]   | [27.2,30.0]   | [14.6,16.4] | [12.1,14.2] | [3.0,3.9]   | [87.9,90.4] | [46.0,50.6] | [38.5,43.4] | [9.6,12.1]  |
| Colombia                  | 18.7          | 17.4          | 9.8         | 7.7         | 1.3         | 93.0        | 52.2        | 40.8        | 7.0         |
|                           | [16.2,21.7]   | [15.1,20.2]   | [8.1,11.8]  | [6.3,9.3]   | [0.9,2.0]   | [90.0,95.2] | [46.2,58.1] | [35.6,46.3] | [4.8,10.0]  |
| Dominican Republic        | 35.3          | 33.0          | 24.8        | 8.1         | 2.3         | 93.5        | 70.4        | 23.1        | 6.5         |

|                               |             |             |             |             |             |             |             |             |             |
|-------------------------------|-------------|-------------|-------------|-------------|-------------|-------------|-------------|-------------|-------------|
|                               | [31.6,39.3] | [29.4,37.0] | [21.5,28.6] | [6.4,10.3]  | [1.6,3.3]   | [90.7,95.4] | [64.4,75.7] | [18.6,28.3] | [4.6,9.3]   |
| El Salvador                   | 19.9        | 18.2        | 10.0        | 8.1         | 1.8         | 91.0        | 50.2        | 40.8        | 9.0         |
|                               | [16.4,24.2] | [14.7,22.4] | [7.5,13.3]  | [6.2,10.8]  | [0.9,3.5]   | [83.0,95.5] | [41.4,58.9] | [31.7,50.6] | [4.5,17.0]  |
| Guatemala                     | 38.5        | 35.0        | 17.5        | 17.4        | 3.6         | 90.7        | 45.4        | 45.3        | 9.3         |
|                               | [35.5,41.8] | [31.9,38.3] | [15.7,19.5] | [15.1,20.1] | [2.8,4.7]   | [88.0,92.9] | [41.9,49.1] | [40.8,49.9] | [7.1,12.0]  |
| Guyana                        | 36.5        | 33.3        | 21.2        | 12.2        | 3.1         | 91.4        | 58.1        | 33.3        | 8.6         |
|                               | [29.7,44.8] | [26.5,41.9] | [15.7,28.6] | [8.9,16.5]  | [1.5,6.6]   | [82.4,96.0] | [47.8,67.7] | [25.1,42.7] | [4.0,17.6]  |
| Haiti                         | 82.9        | 69.0        | 31.6        | 37.4        | 13.9        | 83.3        | 38.1        | 45.2        | 16.7        |
|                               | [76.2,90.1] | [62.4,76.2] | [27.0,36.9] | [32.7,42.8] | [11.7,16.4] | [80.2,85.9] | [33.5,42.9] | [40.7,49.7] | [14.1,19.8] |
| Honduras                      | 29.5        | 26.4        | 16.6        | 9.8         | 3.1         | 89.4        | 56.2        | 33.2        | 10.6        |
|                               | [27.4,31.8] | [24.3,28.6] | [14.8,18.6] | [8.2,11.7]  | [2.4,4.1]   | [86.2,92.0] | [50.8,61.4] | [28.2,38.7] | [8.0,13.8]  |
| Paraguay                      | 19.6        | 18.9        | 8.2         | 10.7        | 0.6         | 96.8        | 42.1        | 54.7        | 3.2         |
|                               | [15.7,24.4] | [15.1,23.7] | [6.4,10.6]  | [7.5,15.2]  | [0.2,1.6]   | [92.2,98.7] | [31.9,53.0] | [43.8,65.2] | [1.3,7.8]   |
| Peru                          | 25.2        | 22.5        | 12.6        | 10.0        | 2.7         | 89.3        | 49.8        | 39.5        | 10.7        |
|                               | [22.9,27.8] | [20.3,25.0] | [10.9,14.4] | [8.6,11.6]  | [1.9,3.8]   | [85.2,92.4] | [45.1,54.6] | [34.9,44.3] | [7.6,14.8]  |
| Suriname                      | 19.9        | 18.0        | 13.1        | 4.8         | 2.0         | 90.2        | 65.8        | 24.3        | 9.8         |
|                               | [14.9,26.6] | [13.4,24.0] | [9.3,18.4]  | [3.0,7.9]   | [0.9,4.1]   | [81.5,95.0] | [52.4,77.1] | [15.6,35.8] | [5.0,18.5]  |
| Low-Income Countries          | 91.6        | 70.9        | 30.7        | 40.2        | 20.7        | 77.4        | 33.5        | 43.9        | 22.6        |
|                               | [89.6,93.6] | [69.4,72.4] | [29.8,31.6] | [38.9,41.4] | [19.8,21.6] | [76.7,78.1] | [32.6,34.5] | [43.0,44.7] | [21.9,23.3] |
| Lower-Middle-Income Countries | 64.6        | 53.3        | 30.1        | 23.2        | 11.3        | 82.5        | 46.6        | 35.9        | 17.5        |
|                               | [63.2,66.0] | [52.1,54.4] | [29.4,30.8] | [22.4,23.9] | [10.9,11.7] | [82.0,82.9] | [45.7,47.5] | [35.2,36.5] | [17.1,18.0] |
| Upper-Middle-Income Countries | 31.6        | 28.3        | 15.9        | 12.4        | 3.3         | 89.6        | 50.3        | 39.3        | 10.4        |
|                               | [30.1,33.2] | [26.9,29.8] | [14.8,17.1] | [11.6,13.3] | [2.9,3.7]   | [88.3,90.7] | [47.9,52.7] | [37.0,41.6] | [9.3,11.7]  |

Notes: 95% confidence intervals are shown in brackets.

**eTable 6.** Share of Deaths Among Children Younger Than 5 Years Occurring at Different Ages Using Detailed Age Intervals

|                           | <1 month     | 1–2 months   | 3–5 months   | 6–11 months  | 12–23 months | 24–35 months | 36–47 months | 48–59 months |
|---------------------------|--------------|--------------|--------------|--------------|--------------|--------------|--------------|--------------|
| Pooled                    | 43.0         | 8.2          | 7.1          | 11.5         | 11.7         | 9.0          | 6.0          | 3.5          |
|                           | [42.4, 43.7] | [7.9, 8.5]   | [6.8, 7.4]   | [11.2, 11.9] | [11.4, 12.1] | [8.6, 9.4]   | [5.8, 6.2]   | [3.3, 3.7]   |
| Least Developed Countries | 36.2         | 8.6          | 7.8          | 13.2         | 13.1         | 10.2         | 6.8          | 4.0          |
|                           | [35.4, 37.0] | [8.2, 9.0]   | [7.4, 8.3]   | [12.8, 13.7] | [12.7, 13.6] | [9.8, 10.7]  | [6.5, 7.1]   | [3.8, 4.2]   |
| East Asia & Pacific       | 48.5         | 12.0         | 8.1          | 10.4         | 8.4          | 5.0          | 5.1          | 2.6          |
|                           | [46.3, 50.7] | [10.7, 13.5] | [7.1, 9.4]   | [9.1, 11.8]  | [7.3, 9.6]   | [4.1, 6.0]   | [4.0, 6.4]   | [2.0, 3.2]   |
| Cambodia                  | 44.2         | 18.0         | 11.2         | 7.3          | 7.0          | 3.1          | 6.2          | 3.0          |
|                           | [40.2, 48.3] | [14.8, 21.8] | [8.5, 14.5]  | [5.5, 9.6]   | [5.1, 9.5]   | [2.1, 4.4]   | [4.3, 8.9]   | [1.8, 5.0]   |
| Indonesia                 | 50.9         | 8.6          | 7.5          | 11.0         | 9.5          | 4.5          | 5.1          | 2.8          |
|                           | [47.8, 54.0] | [6.7, 11.1]  | [5.8, 9.6]   | [8.9, 13.7]  | [8.0, 11.3]  | [3.1, 6.3]   | [3.7, 6.8]   | [2.1, 3.9]   |
| Lao                       | 41.2         | 26.1         | 14.8         | 7.0          | 2.1          | 4.1          | 2.7          | 1.9          |
|                           | [37.3, 45.2] | [23.0, 29.5] | [12.4, 17.6] | [5.5, 9.1]   | [1.2, 3.6]   | [3.2, 5.3]   | [1.9, 3.9]   | [1.0, 3.3]   |
| Mongolia                  | 43.9         | 15.1         | 6.6          | 12.7         | 5.3          | 8.3          | 7.1          | 1.2          |
|                           | [35.3, 52.8] | [9.7, 22.7]  | [3.3, 12.7]  | [7.9, 19.8]  | [3.0, 9.2]   | [4.7, 14.1]  | [3.4, 14.0]  | [0.5, 2.8]   |
| Myanmar                   | 44.4         | 20.0         | 7.6          | 9.3          | 6.7          | 4.9          | 5.9          | 1.2          |
|                           | [38.6, 50.4] | [15.9, 24.9] | [5.3, 10.6]  | [6.9, 12.5]  | [4.8, 9.2]   | [3.2, 7.4]   | [4.3, 8.1]   | [0.8, 2.0]   |
| Papua New Guinea          | 45.7         | 6.3          | 9.5          | 11.2         | 8.1          | 9.8          | 5.9          | 3.5          |
|                           | [39.7, 51.7] | [4.1, 9.6]   | [5.4, 16.1]  | [9.0, 14.0]  | [5.5, 11.7]  | [7.4, 12.9]  | [4.3, 8.2]   | [2.1, 5.8]   |
| Philippines               | 49.4         | 9.8          | 8.6          | 10.7         | 8.7          | 6.0          | 3.8          | 3.0          |
|                           | [44.1, 54.6] | [7.1, 13.4]  | [6.1, 12.1]  | [8.0, 14.1]  | [6.4, 11.8]  | [4.4, 8.1]   | [2.5, 5.8]   | [1.7, 5.3]   |
| Timor-Leste               | 41.6         | 10.1         | 8.0          | 14.3         | 6.2          | 8.3          | 6.9          | 4.6          |
|                           | [36.2, 47.2] | [7.5, 13.3]  | [5.9, 10.7]  | [11.2, 18.2] | [4.3, 9.0]   | [6.3, 11.1]  | [4.6, 10.2]  | [2.9, 7.2]   |
| Tonga                     | 45.6         | 10.3         | 8.5          | 27.3         | 1.4          | 2.4          | 4.3          | NA           |
|                           | [31.0, 60.9] | [1.8, 42.5]  | [3.4, 19.9]  | [11.6, 51.8] | [0.1, 13.5]  | [0.2, 24.9]  | [0.7, 23.9]  |              |
| South Asia                | 57.7         | 9.1          | 6.5          | 8.5          | 7.6          | 4.4          | 3.8          | 2.4          |
|                           | [56.7, 58.8] | [8.5, 9.6]   | [6.0, 7.0]   | [7.9, 9.1]   | [7.1, 8.2]   | [4.1, 4.8]   | [3.5, 4.2]   | [2.1, 2.6]   |
| Afghanistan               | 40.1         | 13.0         | 11.6         | 15.2         | 9.5          | 5.9          | 3.1          | 1.5          |
|                           | [37.1, 43.1] | [11.1, 15.2] | [10.0, 13.3] | [12.9, 17.9] | [8.1, 11.3]  | [4.7, 7.4]   | [2.3, 4.3]   | [1.1, 2.2]   |
| Bangladesh                | 64.0         | 7.2          | 5.6          | 6.5          | 5.8          | 4.9          | 3.7          | 2.5          |
|                           | [61.1, 66.7] | [6.0, 8.5]   | [4.5, 6.9]   | [5.4, 7.7]   | [4.5, 7.5]   | [3.9, 6.1]   | [2.8, 4.8]   | [1.8, 3.4]   |
| India                     | 58.4         | 8.5          | 6.0          | 8.0          | 7.9          | 4.5          | 4.2          | 2.5          |
|                           | [57.5, 59.4] | [8.2, 8.9]   | [5.6, 6.4]   | [7.6, 8.5]   | [7.4, 8.3]   | [4.2, 4.8]   | [3.9, 4.4]   | [2.3, 2.7]   |
| Maldives                  | 58.3         | 7.4          | 13.0         | 6.2          | 4.7          | 3.1          | 3.0          | 4.3          |
|                           | [43.7, 71.7] | [3.8, 14.0]  | [5.1, 29.2]  | [1.7, 20.1]  | [2.4, 9.0]   | [1.2, 7.8]   | [1.0, 8.4]   | [1.6, 11.3]  |
| Nepal                     | 53.8         | 12.7         | 9.9          | 9.0          | 3.7          | 6.2          | 2.0          | 2.8          |
|                           | [48.1, 59.4] | [9.6, 16.8]  | [6.4, 14.8]  | [6.0, 13.2]  | [2.1, 6.4]   | [3.2, 11.7]  | [1.0, 3.9]   | [1.4, 5.3]   |
| Pakistan                  | 57.1         | 10.3         | 7.2          | 9.1          | 7.2          | 3.9          | 3.1          | 2.0          |
|                           | [53.3, 60.8] | [8.5, 12.4]  | [5.7, 9.0]   | [7.2, 11.3]  | [5.7, 9.3]   | [2.8, 5.6]   | [2.3, 4.3]   | [1.4, 2.9]   |
| Europe & Central Asia     | 49.0         | 10.6         | 9.3          | 17.1         | 5.5          | 4.7          | 2.6          | 1.3          |
|                           | [43.2, 54.8] | [7.3, 15.0]  | [5.9, 14.4]  | [12.4, 23.2] | [3.8, 8.0]   | [2.3, 9.2]   | [1.6, 4.1]   | [0.7, 2.3]   |
| Albania                   | 58.3         | 2.1          | 7.7          | 20.9         | 8.8          | NA           | NA           | 2.2          |
|                           | [32.7, 80.1] | [0.3, 13.4]  | [1.6, 30.4]  | [7.2, 47.2]  | [2.4, 27.7]  |              |              | [0.3, 14.1]  |
| Armenia                   | 50.7         | 12.4         | 6.3          | 9.4          | 12.6         | 4.4          | 0.7          | 3.5          |
|                           | [31.7, 69.5] | [3.0, 39.4]  | [1.6, 22.5]  | [2.5, 29.0]  | [5.6, 26.1]  | [0.8, 20.5]  | [0.1, 8.1]   | [0.6, 16.9]  |
| Kyrgyz Republic           | 63.6         | 8.0          | 3.2          | 13.0         | 4.6          | 4.5          | 1.6          | 1.4          |
|                           | [51.1, 74.4] | [4.4, 14.2]  | [1.1, 8.9]   | [6.4, 24.5]  | [1.6, 12.8]  | [1.8, 10.8]  | [0.5, 5.3]   | [0.2, 8.2]   |
| Moldova                   | 75.2         | 11.6         | 1.1          | 6.3          | NA           | 4.8          | NA           | 0.9          |
|                           | [61.1, 85.5] | [4.3, 28.0]  | [0.1, 8.6]   | [1.4, 23.8]  |              | [1.0, 20.0]  |              | [0.1, 7.9]   |

|                            |              |              |              |              |              |              |             |            |
|----------------------------|--------------|--------------|--------------|--------------|--------------|--------------|-------------|------------|
| Tajikistan                 | 44.6         | 7.3          | 10.5         | 19.3         | 9.0          | 3.0          | 3.6         | 2.6        |
|                            | [38.1, 51.3] | [5.0, 10.6]  | [7.7, 14.2]  | [15.2, 24.3] | [6.1, 12.9]  | [1.4, 6.0]   | [1.8, 7.2]  | [1.2, 5.9] |
| Turkey                     | 46.3         | 12.4         | 9.8          | 18.7         | 4.8          | 5.1          | 2.1         | 0.8        |
|                            | [36.4, 56.5] | [7.4, 20.2]  | [5.1, 17.9]  | [10.8, 30.5] | [2.0, 10.9]  | [1.6, 14.6]  | [1.0, 4.6]  | [0.1, 4.6] |
| Turkmenistan               | 54.0         | 8.8          | 10.5         | 10.3         | 4.2          | 5.9          | 4.7         | 1.7        |
|                            | [46.7, 61.0] | [5.9, 13.0]  | [6.8, 15.9]  | [6.7, 15.6]  | [2.3, 7.6]   | [3.3, 10.3]  | [2.3, 9.1]  | [0.4, 6.7] |
| Middle East & North Africa | 51.4         | 10.8         | 9.7          | 12.8         | 6.6          | 4.4          | 2.7         | 1.6        |
|                            | [49.1, 53.7] | [9.5, 12.3]  | [8.4, 11.2]  | [11.4, 14.4] | [5.7, 7.7]   | [3.5, 5.4]   | [2.0, 3.6]  | [1.2, 2.2] |
| Egypt                      | 53.8         | 12.1         | 9.5          | 10.2         | 5.8          | 4.2          | 3.1         | 1.1        |
|                            | [50.2, 57.4] | [9.8, 15.0]  | [7.8, 11.6]  | [8.0, 13.0]  | [4.3, 7.8]   | [3.1, 5.5]   | [2.0, 4.9]  | [0.5, 2.5] |
| Iraq                       | 52.7         | 8.1          | 11.3         | 14.7         | 3.7          | 4.1          | 3.3         | 2.2        |
|                            | [48.6, 56.8] | [6.5, 10.1]  | [8.2, 15.2]  | [11.5, 18.6] | [2.5, 5.2]   | [2.8, 5.9]   | [1.9, 5.4]  | [1.5, 3.3] |
| Jordan                     | 55.4         | 7.3          | 10.4         | 15.0         | 4.1          | 3.9          | 2.9         | 1.0        |
|                            | [46.4, 64.0] | [4.4, 12.0]  | [6.9, 15.2]  | [9.5, 22.8]  | [2.2, 7.5]   | [2.3, 6.5]   | [1.1, 7.8]  | [0.4, 2.7] |
| State of Palestine         | 50.2         | 14.6         | 9.0          | 10.4         | 6.4          | 3.2          | 3.0         | 3.2        |
|                            | [44.2, 56.1] | [11.0, 19.2] | [6.5, 12.5]  | [7.1, 14.9]  | [4.2, 9.5]   | [1.5, 6.8]   | [1.6, 5.6]  | [1.7, 6.0] |
| Tunisia                    | 59.8         | 13.2         | 4.2          | 9.5          | 5.2          | 3.6          | 3.4         | 1.0        |
|                            | [47.7, 70.8] | [7.9, 21.2]  | [1.4, 12.1]  | [5.3, 16.6]  | [2.5, 10.8]  | [1.4, 9.3]   | [1.3, 8.5]  | [0.1, 8.1] |
| Yemen                      | 46.1         | 10.3         | 9.5          | 15.7         | 9.8          | 5.0          | 1.7         | 2.0        |
|                            | [43.1, 49.2] | [8.6, 12.2]  | [8.0, 11.2]  | [13.9, 17.7] | [8.4, 11.5]  | [3.6, 6.8]   | [1.1, 2.5]  | [1.4, 2.7] |
| Eastern & Southern Africa  | 39.4         | 9.0          | 8.2          | 13.2         | 8.3          | 8.3          | 6.0         | 3.7        |
|                            | [38.0, 40.9] | [8.3, 9.7]   | [7.6, 8.7]   | [12.5, 13.8] | [11.6, 13.0] | [7.8, 8.8]   | [5.5, 6.6]  | [3.4, 4.1] |
| Angola                     | 30.6         | 10.4         | 7.1          | 14.7         | 12.1         | 11.7         | 8.5         | 4.8        |
|                            | [27.6, 33.9] | [8.7, 12.4]  | [5.7, 8.8]   | [12.1, 17.9] | [10.4, 14.0] | [10.2, 13.4] | [6.7, 10.9] | [3.5, 6.4] |
| Burundi                    | 30.5         | 9.6          | 7.2          | 13.3         | 15.2         | 10.1         | 9.3         | 4.6        |
|                            | [27.8, 33.3] | [8.0, 11.6]  | [6.2, 8.4]   | [11.7, 15.1] | [13.5, 17.1] | [8.7, 11.8]  | [7.9, 11.0] | [3.7, 5.8] |
| Comoros                    | 51.0         | 14.1         | 7.4          | 4.6          | 6.7          | 7.1          | 5.6         | 3.5        |
|                            | [43.9, 58.1] | [9.0, 21.2]  | [4.7, 11.5]  | [2.6, 8.3]   | [4.1, 10.9]  | [3.8, 12.6]  | [3.1, 9.9]  | [1.7, 7.0] |
| Ethiopia                   | 46.7         | 10.7         | 7.2          | 10.4         | 9.1          | 6.3          | 6.0         | 3.7        |
|                            | [42.4, 51.0] | [8.6, 13.2]  | [5.4, 9.6]   | [8.9, 12.2]  | [7.0, 11.7]  | [5.0, 8.1]   | [4.4, 8.1]  | [2.5, 5.3] |
| Kenya                      | 41.0         | 7.9          | 10.1         | 13.7         | 11.0         | 6.8          | 5.9         | 3.6        |
|                            | [37.6, 44.4] | [6.5, 9.6]   | [8.6, 11.7]  | [12.1, 15.6] | [9.2, 13.1]  | [5.4, 8.5]   | [4.6, 7.4]  | [2.6, 4.9] |
| Lesotho                    | 48.0         | 8.7          | 11.0         | 15.2         | 6.0          | 5.1          | 3.3         | 2.7        |
|                            | [41.1, 55.1] | [6.1, 12.3]  | [7.7, 15.5]  | [11.3, 20.2] | [3.5, 10.1]  | [2.8, 9.1]   | [1.5, 6.9]  | [1.5, 4.9] |
| Madagascar                 | 36.0         | 11.3         | 7.2          | 13.4         | 6.9          | 12.4         | 6.9         | 5.9        |
|                            | [32.9, 39.3] | [9.3, 13.5]  | [5.6, 9.1]   | [11.6, 15.4] | [5.6, 8.5]   | [10.6, 14.4] | [5.3, 9.0]  | [4.6, 7.6] |
| Malawi                     | 35.5         | 7.5          | 6.6          | 12.4         | 14.6         | 11.9         | 6.7         | 4.8        |
|                            | [32.6, 38.5] | [6.4, 8.7]   | [5.6, 7.7]   | [10.9, 14.2] | [12.8, 16.5] | [10.3, 13.7] | [5.7, 7.9]  | [3.6, 6.2] |
| Mozambique                 | 29.6         | 10.8         | 9.6          | 15.7         | 13.3         | 9.7          | 7.8         | 3.5        |
|                            | [27.2, 32.1] | [9.1, 12.7]  | [8.3, 11.1]  | [13.8, 17.8] | [11.2, 15.7] | [8.4, 11.2]  | [6.4, 9.5]  | [2.9, 4.3] |
| Namibia                    | 31.8         | 11.0         | 11.8         | 14.2         | 13.4         | 6.3          | 8.5         | 3.0        |
|                            | [27.3, 36.6] | [8.6, 14.1]  | [8.5, 14.6]  | [11.1, 18.1] | [10.4, 17.0] | [4.1, 9.6]   | [5.8, 12.4] | [1.5, 5.6] |
| Rwanda                     | 33.1         | 8.3          | 6.7          | 14.3         | 14.7         | 8.6          | 8.5         | 5.8        |
|                            | [30.3, 36.1] | [6.8, 10.0]  | [5.3, 8.4]   | [12.3, 16.7] | [12.7, 16.9] | [7.1, 10.4]  | [6.5, 10.9] | [4.5, 7.5] |
| South Africa               | 48.8         | 6.2          | 12.6         | 17.3         | 7.4          | 3.2          | 2.1         | 2.4        |
|                            | [41.6, 56.1] | [4.1, 9.3]   | [8.3, 18.7]  | [12.0, 24.3] | [4.6, 11.6]  | [1.9, 5.3]   | [1.1, 3.9]  | [1.3, 4.3] |
| South Sudan                | 37.1         | 9.9          | 11.3         | 11.2         | 12.2         | 8.4          | 5.4         | 4.5        |
|                            | [32.7, 41.8] | [8.0, 12.2]  | [9.2, 13.7]  | [9.6, 13.2]  | [10.5, 14.1] | [7.0, 10.0]  | [4.2, 6.9]  | [3.5, 5.6] |
| Sudan                      | 44.1         | 7.8          | 8.5          | 12.1         | 14.2         | 7.6          | 3.3         | 2.4        |
|                            | [41.0, 47.3] | [6.0, 10.1]  | [7.1, 10.1]  | [10.1, 14.4] | [12.4, 16.2] | [6.2, 9.3]   | [2.5, 4.4]  | [1.7, 3.3] |
| Swaziland                  | 23.3         | 8.1          | 16.1         | 29.8         | 9.6          | 6.5          | 4.2         | 2.4        |
|                            | [18.3, 29.1] | [5.5, 11.9]  | [11.8, 21.7] | [25.4, 34.6] | [6.4, 14.1]  | [3.8, 11.1]  | [2.4, 7.2]  | [0.9, 5.9] |

|                           |              |              |             |              |              |              |              |             |
|---------------------------|--------------|--------------|-------------|--------------|--------------|--------------|--------------|-------------|
| Tanzania                  | 37.2         | 6.4          | 8.0         | 14.3         | 17.0         | 7.9          | 5.8          | 3.4         |
|                           | [34.1, 40.4] | [4.6, 8.9]   | [6.4, 9.9]  | [12.3, 16.6] | [14.5, 19.8] | [6.6, 9.5]   | [4.6, 7.2]   | [2.5, 4.7]  |
| Uganda                    | 37.4         | 7.9          | 7.1         | 12.9         | 15.3         | 10.1         | 5.8          | 3.6         |
|                           | [35.5, 39.5] | [6.6, 9.4]   | [6.1, 8.2]  | [11.4, 14.6] | [13.8, 16.8] | [8.5, 11.8]  | [4.8, 6.9]   | [2.9, 4.4]  |
| Zambia                    | 38.9         | 8.0          | 6.5         | 12.6         | 14.0         | 9.7          | 6.0          | 4.4         |
|                           | [35.5, 42.4] | [6.4, 10.1]  | [4.8, 8.7]  | [10.6, 14.9] | [11.3, 17.1] | [8.0, 11.8]  | [4.5, 7.8]   | [3.1, 6.1]  |
| Zimbabwe                  | 43.3         | 9.0          | 7.4         | 12.8         | 11.6         | 7.4          | 5.6          | 2.9         |
|                           | [38.8, 47.9] | [7.1, 11.4]  | [5.9, 9.3]  | [10.7, 15.2] | [9.3, 14.5]  | [5.5, 9.8]   | [3.9, 7.9]   | [2.1, 4.0]  |
| West & Central Africa     | 28.9         | 5.8          | 6.4         | 13.2         | 16.3         | 15.3         | 9.0          | 5.1         |
|                           | [28.2, 29.7] | [5.5, 6.1]   | [6.0, 6.9]  | [12.8, 13.7] | [15.7, 16.9] | [14.7, 15.9] | [8.5, 9.5]   | [4.7, 5.4]  |
| Benin                     | 31.9         | 6.3          | 6.0         | 14.1         | 14.0         | 12.3         | 10.4         | 5.1         |
|                           | [29.5, 34.3] | [5.1, 7.7]   | [5.0, 7.2]  | [12.7, 15.8] | [12.6, 15.5] | [10.8, 13.8] | [9.2, 11.8]  | [4.1, 6.2]  |
| Burkina Faso              | 23.2         | 5.9          | 7.4         | 16.0         | 18.9         | 15.0         | 8.7          | 4.8         |
|                           | [21.8, 24.8] | [5.1, 6.9]   | [6.7, 8.2]  | [14.6, 17.5] | [17.7, 20.3] | [13.7, 16.4] | [7.9, 9.5]   | [4.1, 5.8]  |
| Cameroon                  | 33.2         | 7.1          | 6.7         | 12.3         | 13.3         | 12.3         | 9.6          | 5.4         |
|                           | [30.2, 36.3] | [5.6, 8.9]   | [5.8, 7.8]  | [10.6, 14.3] | [11.3, 15.7] | [10.7, 14.1] | [8.2, 11.2]  | [4.0, 7.2]  |
| Chad                      | 24.5         | 6.8          | 7.6         | 16.3         | 17.6         | 14.1         | 8.4          | 4.6         |
|                           | [23.1, 26.0] | [5.9, 7.9]   | [6.6, 8.8]  | [15.3, 17.4] | [15.5, 19.8] | [12.4, 16.0] | [7.1, 10.0]  | [3.9, 5.5]  |
| Congo                     | 29.8         | 6.2          | 7.2         | 14.4         | 15.2         | 14.0         | 8.1          | 5.2         |
|                           | [25.8, 34.1] | [4.7, 8.1]   | [5.3, 9.6]  | [12.3, 16.9] | [12.3, 18.6] | [11.3, 17.1] | [5.9, 11.0]  | [3.6, 7.3]  |
| Congo (DR)                | 27.0         | 5.8          | 9.1         | 16.4         | 15.0         | 12.5         | 8.5          | 5.7         |
|                           | [24.7, 29.5] | [4.7, 7.2]   | [7.9, 10.5] | [15.2, 17.7] | [13.3, 16.9] | [11.1, 14.1] | [7.3, 9.8]   | [4.8, 6.7]  |
| Cote D'Ivoire             | 35.0         | 8.1          | 9.4         | 11.9         | 14.0         | 10.7         | 7.0          | 3.7         |
|                           | [32.2, 38.0] | [6.5, 10.1]  | [7.7, 11.4] | [10.2, 13.9] | [12.2, 16.1] | [9.1, 12.5]  | [5.6, 8.7]   | [2.8, 5.0]  |
| Gabon                     | 40.0         | 3.7          | 7.4         | 16.7         | 11.5         | 8.3          | 7.2          | 5.1         |
|                           | [33.3, 47.1] | [2.5, 5.4]   | [4.9, 11.0] | [12.9, 21.5] | [8.4, 15.6]  | [5.7, 12.0]  | [4.3, 11.8]  | [3.1, 8.3]  |
| Gambia                    | 49.5         | 7.2          | 6.5         | 8.1          | 10.1         | 9.0          | 5.9          | 3.7         |
|                           | [46.0, 53.1] | [5.3, 9.6]   | [5.1, 8.4]  | [6.4, 10.4]  | [8.1, 12.4]  | [7.3, 11.0]  | [4.5, 7.7]   | [2.6, 5.2]  |
| Ghana                     | 44.0         | 6.4          | 6.7         | 10.5         | 10.8         | 8.9          | 6.9          | 5.7         |
|                           | [39.3, 48.9] | [4.7, 8.7]   | [4.7, 9.4]  | [8.0, 13.7]  | [8.6, 13.5]  | [6.9, 11.5]  | [4.6, 10.3]  | [4.0, 8.0]  |
| Guinea                    | 30.8         | 7.1          | 8.1         | 13.7         | 14.2         | 14.8         | 7.2          | 4.0         |
|                           | [27.7, 34.0] | [6.0, 8.4]   | [6.4, 10.3] | [12.1, 15.6] | [12.4, 16.2] | [12.9, 17.0] | [5.9, 8.8]   | [3.1, 5.2]  |
| Liberia                   | 29.9         | 7.0          | 9.3         | 15.4         | 17.5         | 9.6          | 6.6          | 4.8         |
|                           | [26.7, 33.2] | [5.5, 8.7]   | [7.7, 11.2] | [12.8, 18.4] | [14.7, 20.8] | [7.6, 12.0]  | [5.0, 8.6]   | [3.3, 6.9]  |
| Mali                      | 30.5         | 6.4          | 5.7         | 10.9         | 14.2         | 16.9         | 10.4         | 5.0         |
|                           | [27.1, 34.1] | [5.1, 8.0]   | [4.9, 6.7]  | [9.4, 12.6]  | [12.5, 16.0] | [14.9, 19.2] | [8.9, 12.2]  | [4.2, 6.0]  |
| Mauritania                | 52.3         | 12.8         | 5.0         | 7.6          | 6.7          | 8.6          | 4.5          | 2.5         |
|                           | [48.3, 56.3] | [10.9, 14.8] | [3.6, 6.8]  | [5.8, 9.9]   | [4.8, 9.4]   | [7.0, 10.7]  | [2.8, 7.0]   | [1.6, 3.9]  |
| Niger                     | 20.6         | 5.4          | 4.9         | 11.5         | 21.3         | 19.7         | 9.9          | 6.8         |
|                           | [18.7, 22.6] | [4.5, 6.3]   | [4.0, 6.0]  | [10.2, 13.0] | [19.8, 22.8] | [18.2, 21.2] | [8.9, 11.0]  | [5.8, 7.8]  |
| Nigeria                   | 28.6         | 4.9          | 5.0         | 12.2         | 17.4         | 17.4         | 9.4          | 5.0         |
|                           | [26.8, 30.5] | [4.4, 5.5]   | [4.5, 5.7]  | [11.3, 13.2] | [16.3, 18.6] | [16.2, 18.7] | [8.6, 10.3]  | [4.3, 5.7]  |
| Sao Tome & Principe       | 42.1         | 6.4          | 9.1         | 16.5         | 9.0          | 8.3          | 3.8          | 4.8         |
|                           | [33.2, 51.4] | [3.3, 12.0]  | [5.4, 15.1] | [11.2, 23.7] | [4.9, 15.9]  | [4.4, 15.1]  | [2.0, 6.9]   | [1.8, 12.4] |
| Senegal                   | 49.4         | 8.7          | 6.2         | 10.9         | 8.5          | 8.1          | 5.6          | 2.6         |
|                           | [44.7, 54.1] | [6.8, 11.1]  | [4.3, 9.0]  | [8.3, 14.2]  | [6.5, 10.9]  | [6.0, 10.9]  | [3.9, 7.8]   | [1.6, 4.2]  |
| Sierra Leone              | 23.8         | 10.0         | 9.6         | 18.9         | 15.1         | 11.7         | 6.9          | 3.9         |
|                           | [21.7, 26.1] | [8.6, 11.6]  | [8.2, 11.2] | [17.3, 20.7] | [13.6, 16.7] | [10.2, 13.5] | [6.0, 8.0]   | [3.1, 4.8]  |
| Togo                      | 37.5         | 3.7          | 6.7         | 12.6         | 7.9          | 14.2         | 12.8         | 4.5         |
|                           | [32.8, 42.5] | [2.4, 5.6]   | [4.8, 9.2]  | [9.8, 16.1]  | [5.4, 11.2]  | [11.4, 17.6] | [10.4, 15.7] | [3.1, 6.5]  |
| Latin America & Caribbean | 48.3         | 10.2         | 8.3         | 11.7         | 10.7         | 5.2          | 3.5          | 2.0         |
|                           | [46.0, 50.6] | [9.2, 11.3]  | [7.0, 9.8]  | [10.4, 13.2] | [9.6, 11.9]  | [4.5, 6.1]   | [2.8, 4.5]   | [1.5, 2.5]  |

|                               |              |             |             |              |              |              |             |            |
|-------------------------------|--------------|-------------|-------------|--------------|--------------|--------------|-------------|------------|
| Colombia                      | 52.2         | 11.4        | 10.2        | 10.6         | 8.6          | 3.7          | 1.0         | 2.3        |
|                               | [46.2, 58.1] | [8.0, 16.0] | [7.0, 14.8] | [7.5, 14.8]  | [6.3, 11.5]  | [2.3, 5.9]   | [0.5, 2.1]  | [1.3, 4.0] |
| Dominican Republic            | 70.4         | 6.7         | 4.0         | 6.6          | 5.8          | 2.6          | 1.7         | 2.3        |
|                               | [64.4, 75.7] | [5.0, 8.9]  | [2.5, 6.5]  | [4.8, 9.1]   | [3.6, 9.0]   | [1.5, 4.2]   | [0.9, 3.2]  | [1.1, 4.7] |
| El Salvador                   | 50.2         | 12.3        | 11.5        | 10.5         | 6.6          | 5.8          | 0.8         | 2.4        |
|                               | [41.4, 58.9] | [7.0, 20.5] | [7.3, 17.5] | [6.6, 16.3]  | [3.2, 13.1]  | [2.5, 12.7]  | [0.2, 2.5]  | [0.7, 7.9] |
| Guatemala                     | 45.4         | 12.7        | 9.2         | 10.6         | 12.9         | 5.1          | 3.2         | 1.0        |
|                               | [41.9, 49.1] | [9.7, 16.5] | [7.0, 12.0] | [8.3, 13.3]  | [10.3, 16.0] | [3.5, 7.3]   | [2.2, 4.7]  | [0.5, 2.2] |
| Guyana                        | 58.1         | 6.6         | 8.8         | 11.8         | 6.1          | 1.4          | 5.3         | 1.9        |
|                               | [47.8, 67.7] | [3.9, 11.0] | [5.0, 15.1] | [7.5, 18.1]  | [2.6, 13.4]  | [0.4, 4.6]   | [2.0, 13.2] | [0.4, 8.7] |
| Haiti                         | 38.1         | 8.5         | 8.8         | 14.9         | 13.0         | 7.7          | 6.6         | 2.5        |
|                               | [33.5, 42.9] | [6.9, 10.3] | [6.8, 11.4] | [12.8, 17.1] | [11.2, 15.0] | [6.1, 9.7]   | [4.8, 9.1]  | [1.6, 3.8] |
| Honduras                      | 56.2         | 7.7         | 6.2         | 10.3         | 9.1          | 4.9          | 4.2         | 1.5        |
|                               | [50.8, 61.4] | [5.7, 10.3] | [4.3, 8.8]  | [7.5, 14.0]  | [6.7, 12.1]  | [3.3, 7.2]   | [2.6, 6.5]  | [0.8, 2.7] |
| Paraguay                      | 42.1         | 15.8        | 14.6        | 18.4         | 5.9          | 1.8          | 1.1         | 0.3        |
|                               | [31.9, 53.0] | [8.1, 28.5] | [8.1, 24.8] | [9.0, 33.9]  | [2.2, 14.9]  | [0.6, 5.5]   | [0.2, 5.6]  | [0.0, 4.0] |
| Peru                          | 49.8         | 10.7        | 5.9         | 11.1         | 11.8         | 5.2          | 3.2         | 2.3        |
|                               | [45.1, 54.6] | [7.7, 14.7] | [4.0, 8.6]  | [7.4, 16.2]  | [8.5, 16.1]  | [3.1, 8.6]   | [1.4, 7.0]  | [1.4, 3.8] |
| Suriname                      | 65.8         | 6.7         | 6.9         | 9.4          | 1.2          | 5.7          | 4.1         | NA         |
|                               | [52.4, 77.1] | [3.2, 13.7] | [2.9, 15.6] | [4.2, 20.0]  | [0.4, 3.8]   | [2.3, 13.7]  | [1.5, 10.5] |            |
| Low-Income Countries          | 33.5         | 8.1         | 8.0         | 13.8         | 13.9         | 11.1         | 7.1         | 4.3        |
|                               | [32.6, 34.5] | [7.6, 8.7]  | [7.6, 8.4]  | [13.2, 14.5] | [13.3, 14.5] | [10.7, 11.6] | [6.8, 7.5]  | [4.0, 4.6] |
| Lower-Middle-Income Countries | 46.6         | 8.1         | 6.5         | 10.3         | 11.0         | 8.5          | 5.8         | 3.2        |
|                               | [45.7, 47.5] | [7.8, 8.4]  | [6.2, 6.8]  | [9.8, 10.8]  | [10.5, 11.5] | [8.2, 8.9]   | [5.5, 6.0]  | [3.1, 3.4] |
| Upper-Middle-Income Countries | 50.3         | 8.8         | 9.1         | 13.0         | 8.4          | 4.3          | 3.8         | 2.4        |
|                               | [47.9, 52.7] | [7.8, 10.0] | [8.0, 10.3] | [11.4, 14.9] | [7.3, 9.6]   | [3.5, 5.2]   | [3.0, 4.7]  | [1.9, 3.0] |

Notes: 95% confidence intervals are shown in brackets.



**eTable 7. Mortality (Deaths per 1000) at Different Ages by Living Standards**

|                           | 0–59 months  |             |              | 0–23 months  |             |              | Neonates    |             |             | 1–23 months |             |             | 24–59 months |            |             |
|---------------------------|--------------|-------------|--------------|--------------|-------------|--------------|-------------|-------------|-------------|-------------|-------------|-------------|--------------|------------|-------------|
|                           | Worst        | Best        | Difference   | Worst        | Best        | Difference   | Worst       | Best        | Difference  | Worst       | Best        | Difference  | Worst        | Best       | Difference  |
| Pooled                    | 84.5         | 40.0        | 44.5         | 67.2         | 35.1        | 32.1         | 33.7        | 21.1        | 12.5        | 33.5        | 13.9        | 19.5        | 17.3         | 4.9        | 12.4        |
|                           | [82.3,86.8]  | [38.3,41.8] | [41.8,47.1]  | [65.4,68.9]  | [33.5,36.8] | [29.9,34.3]  | [32.6,34.8] | [20.0,22.4] | [11.0,14.1] | [32.1,34.9] | [13.1,14.8] | [17.8,21.2] | [16.4,18.3]  | [4.5,5.4]  | [11.7,13.2] |
| Least Developed Countries | 92.9         | 56.8        | 36.1         | 72.1         | 47.9        | 24.2         | 30.4        | 25.1        | 5.3         | 41.7        | 22.8        | 18.9        | 20.9         | 8.9        | 11.9        |
|                           | [89.8,96.1]  | [54.5,59.2] | [31.5,40.7]  | [69.4,74.8]  | [45.6,50.3] | [19.8,28.5]  | [28.8,32.1] | [23.0,27.4] | [2.9,7.7]   | [39.8,43.6] | [21.1,24.7] | [15.6,22.1] | [19.9,21.9]  | [8.1,9.9]  | [10.5,13.4] |
| East Asia & Pacific       | 57.0         | 21.4        | 35.6         | 48.7         | 19.4        | 29.3         | 23.1        | 12.1        | 11.0        | 25.6        | 7.3         | 18.4        | 8.3          | 2.0        | 6.3         |
|                           | [53.5,60.8]  | [18.0,25.5] | [29.7,41.5]  | [45.6,52.1]  | [16.1,23.3] | [24.3,34.4]  | [20.7,25.8] | [9.7,15.1]  | [7.1,14.9]  | [23.1,28.5] | [5.5,9.6]   | [14.9,21.8] | [7.0,9.9]    | [1.2,3.4]  | [4.4,8.2]   |
| Cambodia                  | 76.4         | 18.7        | 57.7         | 67.3         | 16.8        | 50.5         | 26.8        | 11.7        | 15.1        | 40.5        | 5.1         | 35.4        | 9.1          | 1.9        | 7.2         |
|                           | [63.9,91.1]  | [13.5,25.9] | [41.6,73.8]  | [55.8,81.1]  | [11.6,24.3] | [35.5,65.5]  | [19.7,36.4] | [7.9,17.5]  | [5.4,24.7]  | [32.0,51.1] | [2.6,10.1]  | [24.7,46.1] | [5.4,15.3]   | [0.7,4.8]  | [2.7,11.7]  |
| Indonesia                 | 52.5         | 23.9        | 28.6         | 45.3         | 21.5        | 23.8         | 22.6        | 12.6        | 10.0        | 22.7        | 8.8         | 13.9        | 7.2          | 2.4        | 4.7         |
|                           | [47.5,58.0]  | [20.0,28.5] | [19.6,37.6]  | [41.2,49.8]  | [17.7,26.0] | [15.6,32.1]  | [19.3,26.4] | [9.9,16.1]  | [4.1,15.8]  | [19.4,26.6] | [6.5,12.1]  | [8.7,19.0]  | [4.8,10.7]   | [1.4,4.2]  | [1.5,7.9]   |
| Lao                       | 67.0         | 20.5        | 46.5         | 61.1         | 17.8        | 43.2         | 23.6        | 14.0        | 9.6         | 37.4        | 3.8         | 33.6        | 6.0          | 2.7        | 3.3         |
|                           | [59.4,75.6]  | [13.5,31.0] | [34.8,58.2]  | [54.0,69.0]  | [11.1,28.5] | [32.0,54.4]  | [20.0,28.0] | [8.5,23.0]  | [2.5,16.8]  | [31.9,43.9] | [1.7,8.7]   | [25.9,41.3] | [4.3,8.3]    | [1.2,6.0]  | [-0.3,6.9]  |
| Mongolia                  | 29.8         | 14.2        | 15.6         | 25.4         | 10.8        | 14.5         | 13.6        | 6.4         | 7.1         | 11.8        | 4.4         | 7.4         | 4.4          | 3.4        | 1.0         |
|                           | [24.9,35.6]  | [7.4,27.2]  | [4.8,26.4]   | [20.3,31.6]  | [4.5,25.6]  | [3.6,25.4]   | [9.6,19.0]  | [2.3,17.7]  | [0.4,13.9]  | [8.4,16.6]  | [1.7,11.1]  | [1.3,13.5]  | [2.0,9.5]    | [1.1,9.9]  | [-4.3,6.4]  |
| Myanmar                   | 98.8         | 25.9        | 72.9         | 84.7         | 24.0        | 60.7         | 35.0        | 17.1        | 17.9        | 49.6        | 6.9         | 42.8        | 14.2         | 2.0        | 12.2        |
|                           | [83.9,116.0] | [16.3,41.1] | [51.0,94.7]  | [69.9,102.2] | [14.8,38.6] | [40.1,81.2]  | [27.7,44.2] | [9.8,29.7]  | [4.8,31.0]  | [39.3,62.5] | [2.9,16.2]  | [27.4,58.2] | [9.7,20.5]   | [0.4,9.8]  | [6.8,17.6]  |
| Papua New Guinea          | 69.2         | 35.9        | 33.2         | 54.6         | 31.0        | 23.7         | 28.7        | 19.7        | 9.0         | 26.0        | 11.3        | 14.7        | 14.5         | 5.0        | 9.5         |
|                           | [54.8,86.9]  | [27.4,47.0] | [11.7,54.7]  | [42.1,70.6]  | [23.8,40.2] | [4.3,43.1]   | [22.0,37.2] | [14.7,26.4] | [-1.6,19.5] | [17.8,37.7] | [8.2,15.4]  | [1.2,28.2]  | [9.7,21.5]   | [2.5,9.7]  | [3.1,15.9]  |
| Philippines               | 42.0         | 11.2        | 30.8         | 34.9         | 10.7        | 24.2         | 17.9        | 7.6         | 10.3        | 17.0        | 3.1         | 13.9        | 7.1          | 0.5        | 6.6         |
|                           | [34.9,50.4]  | [6.9,18.0]  | [21.4,40.3]  | [28.7,42.5]  | [6.6,17.3]  | [15.4,33.0]  | [13.8,23.1] | [4.1,13.9]  | [3.8,16.9]  | [13.3,21.6] | [1.4,7.0]   | [8.8,19.0]  | [4.8,10.4]   | [0.1,3.1]  | [3.8,9.5]   |
| Timor-Leste               | 54.8         | 25.1        | 29.7         | 40.3         | 20.4        | 20.0         | 16.8        | 16.6        | 0.2         | 23.5        | 3.8         | 19.7        | 14.4         | 4.7        | 9.7         |
|                           | [45.4,66.0]  | [16.7,37.6] | [17.8,41.5]  | [32.5,49.9]  | [13.4,30.9] | [9.4,30.5]   | [12.0,23.5] | [10.3,26.5] | [-9.0,9.5]  | [18.9,29.2] | [2.0,7.3]   | [14.8,24.6] | [10.0,20.9]  | [2.2,10.1] | [4.4,15.0]  |
| Tonga                     | 15.7         | 1.1         | 14.6         | 15.7         | 1.1         | 14.6         | 5.9         | NA          | NA          | 9.8         | 1.1         | 8.8         | NA           | NA         | NA          |
|                           | [7.1,34.3]   | [0.2,4.7]   | [3.2,26.1]   | [7.1,34.3]   | [0.2,4.7]   | [3.2,26.1]   | [2.8,12.4]  |             |             | [2.8,33.6]  | [0.2,4.7]   | [-2.4,19.9] |              |            |             |
| South Asia                | 76.4         | 30.2        | 46.2         | 66.4         | 27.8        | 38.6         | 41.5        | 19.9        | 21.6        | 24.9        | 7.9         | 17.0        | 10.0         | 2.4        | 7.6         |
|                           | [74.3,78.5]  | [27.7,32.9] | [42.9,49.5]  | [64.5,68.3]  | [25.2,30.6] | [35.8,41.4]  | [40.1,43.0] | [17.8,22.2] | [19.2,24.1] | [23.6,26.3] | [6.9,9.0]   | [14.9,19.1] | [9.2,10.9]   | [1.8,3.2]  | [6.5,8.7]   |
| Afghanistan               | 80.5         | 39.9        | 40.6         | 70.9         | 36.4        | 34.4         | 32.1        | 17.3        | 14.9        | 38.7        | 19.2        | 19.6        | 9.7          | 3.5        | 6.2         |
|                           | [73.7,87.9]  | [33.6,47.5] | [26.4,54.8]  | [64.3,78.0]  | [30.3,43.8] | [21.2,47.6]  | [26.5,38.8] | [12.3,24.1] | [3.4,26.4]  | [34.0,44.1] | [14.2,25.8] | [9.4,29.7]  | [7.3,12.7]   | [2.2,5.6]  | [3.3,9.0]   |
| Bangladesh                | 50.6         | 28.2        | 22.3         | 44.5         | 25.7        | 18.8         | 30.2        | 18.8        | 11.4        | 14.3        | 6.9         | 7.4         | 6.1          | 2.5        | 3.6         |
|                           | [45.8,55.8]  | [24.0,33.2] | [16.3,28.3]  | [39.8,49.7]  | [21.5,30.7] | [12.7,24.8]  | [26.7,34.2] | [15.0,23.7] | [6.1,16.6]  | [11.7,17.5] | [4.9,9.6]   | [4.3,10.5]  | [4.8,7.6]    | [1.7,3.8]  | [1.8,5.4]   |
| India                     | 75.2         | 24.5        | 50.7         | 65.3         | 22.4        | 42.9         | 41.6        | 15.4        | 26.2        | 23.7        | 7.0         | 16.7        | 9.9          | 2.1        | 7.8         |
|                           | [73.2,77.3]  | [22.8,26.3] | [48.2,53.2]  | [63.4,67.3]  | [20.8,24.1] | [40.7,45.1]  | [39.8,43.4] | [14.3,16.6] | [24.5,27.8] | [22.7,24.7] | [5.9,8.2]   | [15.6,17.9] | [9.4,10.5]   | [1.6,2.8]  | [6.7,8.9]   |
| Maldives                  | 15.0         | 22.6        | -7.6         | 11.7         | 20.6        | -9.0         | 8.0         | 20.6        | -12.7       | 3.7         | NA          | NA          | 3.3          | 2.0        | 1.3         |
|                           | [9.9,22.7]   | [10.4,48.4] | [-28.6,13.3] | [7.5,18.2]   | [9.2,45.8]  | [-29.5,11.5] | [4.8,13.1]  | [9.2,45.8]  | [-32.3,7.0] | [1.8,7.6]   |             |             | [1.6,6.8]    | [0.3,12.0] | [-3.6,6.3]  |
| Nepal                     | 39.7         | 19.7        | 20.1         | 35.4         | 15.1        | 20.3         | 22.0        | 12.8        | 9.2         | 13.4        | 2.3         | 11.1        | 4.3          | 4.5        | -0.2        |
|                           | [31.9,49.3]  | [12.6,30.6] | [9.4,30.7]   | [27.7,45.1]  | [9.1,25.1]  | [10.1,30.5]  | [15.2,31.6] | [7.3,22.3]  | [-0.2,18.5] | [10.0,18.1] | [0.7,8.0]   | [6.6,15.6]  | [2.4,7.7]    | [0.9,22.3] | [-6.2,5.8]  |
| Pakistan                  | 97.5         | 54.0        | 43.5         | 84.2         | 50.8        | 33.5         | 49.9        | 40.5        | 9.4         | 34.3        | 10.3        | 24.0        | 13.2         | 3.2        | 10.0        |
|                           | [85.2,111.3] | [42.2,68.8] | [28.2,58.7]  | [72.8,97.4]  | [40.0,64.2] | [18.5,48.4]  | [42.7,58.3] | [30.3,53.8] | [-0.4,19.3] | [25.7,45.7] | [6.7,15.8]  | [13.4,34.7] | [10.3,16.9]  | [1.2,8.3]  | [5.8,14.2]  |
| Europe & Central Asia     | 30.2         | 11.1        | 19.1         | 27.7         | 10.6        | 17.1         | 13.1        | 5.1         | 8.0         | 14.5        | 5.5         | 9.0         | 2.5          | 0.5        | 2.0         |
|                           | [25.7,35.4]  | [7.3,16.9]  | [11.4,26.8]  | [23.5,32.6]  | [6.8,16.5]  | [9.4,24.7]   | [10.2,16.8] | [3.2,8.2]   | [3.8,12.2]  | [11.5,18.3] | [2.4,12.6]  | [3.6,14.5]  | [1.2,5.2]    | [0.2,1.3]  | [0.3,3.7]   |
| Albania                   | 14.3         | 0.4         | 13.9         | 13.8         | 0.4         | 13.4         | 5.2         | 0.4         | 4.8         | 8.6         | NA          | NA          | 0.5          | NA         | NA          |
|                           | [8.1,25.3]   | [0.1,2.0]   | [6.8,21.1]   | [7.7,24.7]   | [0.1,2.0]   | [6.4,20.4]   | [2.6,10.6]  | [0.1,2.0]   | [1.1,8.6]   | [3.5,20.7]  |             |             | [0.1,3.5]    |            |             |
| Armenia                   | 14.6         | 4.5         | 10.1         | 14.6         | 4.5         | 10.1         | 4.0         | 2.2         | 1.9         | 10.6        | 2.4         | 8.3         | NA           | NA         | NA          |
|                           | [7.8,27.3]   | [1.6,12.7]  | [-0.3,20.5]  | [7.8,27.3]   | [1.6,12.7]  | [-0.3,20.5]  | [1.3,12.8]  | [0.5,9.0]   | [-2.9,6.7]  | [5.2,21.6]  | [0.4,13.8]  | [-1.3,17.8] |              |            |             |

|                            |               |              |              |              |             |              |             |             |              |             |             |              |             |            |             |
|----------------------------|---------------|--------------|--------------|--------------|-------------|--------------|-------------|-------------|--------------|-------------|-------------|--------------|-------------|------------|-------------|
| Kyrgyz Republic            | 21.3          | 11.0         | 10.4         | 21.1         | 10.5        | 10.7         | 12.8        | 7.9         | 4.8          | 8.4         | 2.5         | 5.9          | 0.2         | 0.5        | -0.3        |
|                            | [14.7,30.9]   | [6.1,19.7]   | [-1.0,21.7]  | [14.6,30.6]  | [5.7,19.2]  | [-0.5,21.9]  | [7.6,21.3]  | [4.0,15.9]  | [-6.1,15.8]  | [4.2,16.7]  | [1.1,5.6]   | [-1.4,13.2]  | [0.0,1.0]   | [0.1,3.1]  | [-1.4,0.7]  |
| Moldova                    | 29.8          | 12.5         | 17.3         | 29.8         | 12.5        | 17.3         | 22.5        | 10.2        | 12.2         | 7.4         | 2.3         | 5.1          | NA          | NA         | NA          |
|                            | [16.8,52.5]   | [7.8,19.9]   | [0.0,34.6]   | [16.8,52.5]  | [7.8,19.9]  | [0.0,34.6]   | [11.5,43.6] | [5.7,18.3]  | [-2.7,27.2]  | [2.2,24.2]  | [0.5,11.5]  | [-3.6,13.7]  |             |            |             |
| Tajikistan                 | 46.7          | 20.4         | 26.2         | 45.1         | 19.6        | 25.5         | 19.6        | 12.0        | 7.6          | 25.4        | 7.5         | 17.9         | 1.6         | 0.9        | 0.7         |
|                            | [37.7,57.7]   | [16.0,26.1]  | [13.2,39.3]  | [36.2,56.0]  | [15.3,24.9] | [12.9,38.2]  | [14.3,27.0] | [8.3,17.3]  | [-1.2,16.4]  | [19.0,34.0] | [4.9,11.5]  | [8.8,27.0]   | [0.5,4.7]   | [0.3,2.9]  | [-1.3,2.6]  |
| Turkey                     | 27.9          | 8.1          | 19.8         | 25.0         | 7.8         | 17.3         | 11.2        | 1.8         | 9.3          | 13.9        | 5.9         | 7.9          | 2.8         | 0.3        | 2.5         |
|                            | [21.0,36.9]   | [2.9,22.4]   | [8.5,31.1]   | [18.6,33.7]  | [2.7,22.4]  | [6.0,28.6]   | [7.5,16.6]  | [0.2,13.9]  | [3.5,15.2]   | [9.0,21.3]  | [1.9,18.0]  | [-2.0,17.8]  | [1.2,6.6]   | [0.0,2.4]  | [0.4,4.6]   |
| Turkmenistan               | 39.5          | 23.1         | 16.5         | 34.1         | 21.3        | 12.8         | 21.1        | 16.4        | 4.8          | 13.0        | 5.0         | 8.0          | 5.4         | 1.7        | 3.7         |
|                            | [30.1,51.7]   | [16.4,32.4]  | [-1.4,34.3]  | [25.7,45.1]  | [15.0,30.3] | [-3.2,28.7]  | [14.4,30.9] | [10.6,25.1] | [-7.8,17.3]  | [8.3,20.2]  | [2.5,9.8]   | [-0.1,16.1]  | [2.6,11.1]  | [0.4,6.7]  | [-1.0,8.4]  |
| Middle East & North Africa | 41.4          | 20.9         | 20.5         | 37.3         | 19.5        | 17.8         | 20.7        | 11.8        | 9.0          | 16.6        | 7.8         | 8.8          | 4.1         | 1.3        | 2.7         |
|                            | [37.9,45.2]   | [17.9,24.3]  | [15.0,26.0]  | [33.8,41.2]  | [16.7,22.9] | [12.5,23.0]  | [18.4,23.3] | [9.7,14.3]  | [5.8,12.1]   | [14.4,19.1] | [6.2,9.7]   | [5.5,12.2]   | [3.3,5.1]   | [0.8,2.4]  | [1.7,3.8]   |
| Egypt                      | 42.2          | 19.2         | 22.9         | 38.6         | 18.6        | 19.9         | 23.1        | 11.1        | 11.9         | 15.5        | 7.5         | 8.0          | 3.6         | 0.6        | 3.0         |
|                            | [35.0,50.8]   | [15.4,24.0]  | [14.4,31.5]  | [31.7,46.9]  | [15.0,23.2] | [11.3,28.6]  | [18.0,29.5] | [8.4,14.7]  | [5.6,18.2]   | [12.2,19.7] | [5.5,10.3]  | [2.9,13.1]   | [2.1,6.2]   | [0.1,2.8]  | [0.8,5.2]   |
| Iraq                       | 29.3          | 16.3         | 13.0         | 25.5         | 14.3        | 11.3         | 15.4        | 8.0         | 7.4          | 10.2        | 6.3         | 3.9          | 3.8         | 2.0        | 1.7         |
|                            | [25.2,34.1]   | [11.8,22.5]  | [6.5,19.5]   | [21.6,30.2]  | [10.2,19.9] | [4.9,17.6]   | [12.5,18.8] | [5.7,11.2]  | [2.9,11.8]   | [8.1,12.7]  | [3.7,10.7]  | [0.2,7.5]    | [3.0,4.8]   | [0.9,4.5]  | [-0.3,3.8]  |
| Jordan                     | 19.4          | 16.3         | 3.1          | 18.0         | 16.2        | 1.8          | 10.0        | 10.9        | -0.9         | 8.0         | 5.3         | 2.7          | 1.4         | 0.1        | 1.3         |
|                            | [14.6,25.6]   | [8.8,30.0]   | [-7.5,13.6]  | [13.4,24.2]  | [8.7,29.9]  | [-8.9,12.5]  | [7.2,13.9]  | [5.4,22.0]  | [-9.2,7.5]   | [4.5,14.2]  | [1.9,14.3]  | [-2.5,7.8]   | [0.7,2.6]   | [0.0,0.7]  | [0.4,2.2]   |
| State of Palestine         | 24.7          | 16.4         | 8.3          | 23.6         | 14.2        | 9.3          | 10.8        | 6.4         | 4.4          | 12.8        | 7.8         | 5.0          | 1.1         | 2.1        | -1.0        |
|                            | [18.7,32.4]   | [11.7,22.9]  | [-0.3,16.9]  | [17.8,31.1]  | [10.3,19.8] | [0.7,18.0]   | [7.8,14.9]  | [3.8,10.9]  | [-0.6,9.3]   | [8.4,19.4]  | [5.4,11.2]  | [-1.5,11.5]  | [0.4,2.9]   | [0.8,5.3]  | [-3.1,1.1]  |
| Tunisia                    | 25.9          | 5.4          | 20.5         | 22.8         | 4.8         | 18.1         | 15.2        | 3.1         | 12.1         | 7.6         | 1.7         | 5.9          | 3.1         | 0.7        | 2.4         |
|                            | [18.2,36.7]   | [2.6,11.3]   | [10.6,30.3]  | [15.8,32.8]  | [2.1,10.7]  | [8.5,27.6]   | [9.3,24.8]  | [1.1,8.9]   | [3.9,20.3]   | [4.0,14.3]  | [0.5,5.8]   | [1.4,10.5]   | [1.0,9.5]   | [0.1,3.9]  | [-0.6,5.4]  |
| Yemen                      | 69.1          | 37.8         | 31.3         | 61.9         | 35.1        | 26.8         | 28.5        | 22.4        | 6.2          | 33.4        | 12.7        | 20.7         | 7.2         | 2.8        | 4.5         |
|                            | [61.5,77.7]   | [32.2,44.4]  | [21.1,41.6]  | [55.0,69.6]  | [29.7,41.4] | [16.9,36.8]  | [24.3,33.5] | [18.1,27.5] | [-1.3,13.6]  | [27.4,40.6] | [8.4,19.2]  | [13.4,27.9]  | [5.4,9.7]   | [1.5,5.1]  | [2.2,6.8]   |
| Eastern & Southern Africa  | 84.4          | 57.3         | 27.1         | 66.5         | 50.5        | 16.0         | 29.0        | 28.8        | 0.2          | 37.5        | 21.6        | 15.9         | 17.9        | 6.8        | 11.1        |
|                            | [81.0,88.0]   | [53.7,61.1]  | [20.5,33.7]  | [63.4,69.8]  | [47.0,54.2] | [10.0,22.1]  | [26.6,31.5] | [25.6,32.4] | [-4.1,4.4]   | [35.0,40.2] | [19.2,24.4] | [12.1,19.6]  | [16.5,19.5] | [5.8,8.1]  | [8.9,13.3]  |
| Angola                     | 102.2         | 38.8         | 63.3         | 74.2         | 28.8        | 45.4         | 31.1        | 11.5        | 19.6         | 43.1        | 17.3        | 25.8         | 28.0        | 10.0       | 18.0        |
|                            | [92.1,113.2]  | [27.4,54.7]  | [42.1,84.6]  | [66.5,82.7]  | [19.9,41.6] | [27.6,63.2]  | [24.8,38.9] | [7.1,18.7]  | [8.9,30.2]   | [35.9,51.6] | [10.7,27.7] | [13.6,38.1]  | [23.1,33.9] | [6.0,16.8] | [10.3,25.6] |
| Burundi                    | 119.0         | 51.6         | 67.4         | 89.5         | 42.7        | 46.8         | 33.8        | 21.0        | 12.8         | 55.7        | 21.8        | 34.0         | 29.5        | 8.9        | 20.6        |
|                            | [107.1,132.0] | [42.0,63.3]  | [54.0,80.8]  | [80.7,99.2]  | [33.7,54.1] | [34.2,59.4]  | [27.1,42.1] | [15.7,28.0] | [3.4,22.3]   | [49.6,62.6] | [17.0,27.9] | [26.5,41.4]  | [24.0,36.2] | [6.4,12.3] | [14.5,26.7] |
| Comoros                    | 52.0          | 40.1         | 11.9         | 39.4         | 38.3        | 1.1          | 18.9        | 22.7        | -3.8         | 20.5        | 15.6        | 4.9          | 12.6        | 1.8        | 10.8        |
|                            | [38.7,69.4]   | [26.4,60.4]  | [-13.3,37.1] | [27.6,56.0]  | [25.0,58.1] | [-26.6,28.8] | [11.1,32.2] | [12.1,42.2] | [-23.1,15.5] | [11.8,35.2] | [7.8,31.0]  | [-12.5,22.3] | [6.1,25.6]  | [0.3,10.8] | [1.0,20.5]  |
| Ethiopia                   | 89.7          | 66.7         | 23.0         | 71.5         | 60.8        | 10.7         | 36.3        | 40.0        | -3.8         | 35.2        | 20.7        | 14.5         | 18.3        | 5.9        | 12.3        |
|                            | [74.0,108.4]  | [53.3,83.2]  | [2.0,44.0]   | [58.7,86.8]  | [47.1,78.1] | [-9.5,31.0]  | [28.9,45.5] | [27.2,58.5] | [-20.8,13.3] | [25.1,49.1] | [14.0,30.6] | [3.7,25.3]   | [13.4,24.8] | [2.1,16.5] | [4.7,19.9]  |
| Kenya                      | 56.7          | 46.6         | 10.1         | 45.8         | 41.9        | 3.9          | 20.1        | 25.6        | -5.5         | 25.8        | 16.3        | 9.4          | 10.9        | 4.7        | 6.2         |
|                            | [51.4,62.5]   | [39.2,55.3]  | [0.3,19.9]   | [41.4,50.8]  | [34.7,50.5] | [-6.6,14.5]  | [17.1,23.6] | [20.1,32.5] | [-13.0,1.9]  | [22.6,29.3] | [11.8,22.5] | [3.5,15.4]   | [8.7,13.6]  | [2.4,9.0]  | [2.8,9.6]   |
| Lesotho                    | 83.3          | 80.3         | 3.0          | 76.2         | 65.1        | 11.1         | 35.9        | 38.4        | -2.5         | 40.3        | 26.7        | 13.6         | 7.1         | 15.2       | -8.1        |
|                            | [69.9,99.1]   | [57.3,111.3] | [-27.8,33.8] | [63.2,91.6]  | [43.6,96.0] | [-21.4,43.7] | [26.6,48.4] | [22.3,65.4] | [-29.7,24.8] | [32.1,50.4] | [16.3,43.4] | [-4.2,31.3]  | [4.0,12.7]  | [6.8,33.5] | [-19.6,3.4] |
| Madagascar                 | 74.6          | 39.1         | 35.6         | 51.3         | 33.0        | 18.3         | 22.6        | 19.1        | 3.5          | 28.7        | 14.0        | 14.8         | 23.3        | 6.0        | 17.3        |
|                            | [63.8,87.1]   | [31.5,48.4]  | [23.2,47.9]  | [43.5,60.5]  | [25.6,42.5] | [7.7,28.9]   | [17.7,28.9] | [13.9,26.1] | [-3.2,10.3]  | [24.0,34.3] | [9.2,21.3]  | [7.4,22.1]   | [17.5,30.9] | [3.4,10.7] | [10.1,24.4] |
| Malawi                     | 83.2          | 60.1         | 61.0         | 49.2         | 27.5        | 11.9         | 27.5        | 25.3        | 2.2          | 33.5        | 23.8        | 9.7          | 22.1        | 10.9       | 11.2        |
|                            | [74.6,92.6]   | [50.6,71.3]  | [7.1,39.0]   | [53.4,69.7]  | [41.1,58.8] | [-1.2,24.9]  | [23.0,32.8] | [19.6,32.6] | [-5.5,9.8]   | [28.3,39.8] | [18.7,30.3] | [1.9,17.5]   | [18.4,26.6] | [7.1,16.8] | [5.2,17.2]  |
| Mozambique                 | 129.4         | 90.7         | 38.7         | 98.2         | 77.4        | 20.8         | 33.1        | 32.7        | 0.5          | 65.0        | 44.7        | 20.3         | 31.2        | 13.3       | 17.9        |
|                            | [113.3,147.5] | [80.4,102.2] | [16.6,60.8]  | [86.0,111.8] | [67.6,88.4] | [1.3,40.3]   | [25.9,42.3] | [27.1,39.4] | [-8.3,9.3]   | [55.6,76.0] | [37.0,54.0] | [4.3,36.3]   | [23.5,41.3] | [9.9,17.9] | [10.4,25.4] |
| Namibia                    | 66.8          | 30.7         | 36.1         | 58.1         | 26.2        | 31.9         | 23.1        | 11.4        | 11.6         | 35.0        | 14.8        | 20.2         | 8.7         | 4.5        | 4.3         |
|                            | [58.7,75.9]   | [19.1,48.8]  | [16.5,55.7]  | [49.8,67.6]  | [15.5,43.9] | [13.7,50.0]  | [17.1,31.0] | [6.5,19.9]  | [-0.5,23.7]  | [28.2,43.3] | [7.6,28.5]  | [9.2,31.3]   | [5.6,13.6]  | [1.5,13.0] | [-1.5,10.0] |
| Rwanda                     | 84.4          | 40.0         | 44.4         | 63.6         | 31.8        | 23.5         | 31.8        | 23.5        | 10.3         | 40.1        | 18.6        | 21.5         | 20.8        | 8.2        | 12.6        |
|                            | [74.1,96.1]   | [31.8,50.2]  | [31.1,57.7]  | [55.2,73.1]  | [25.4,39.8] | [21.1,42.5]  | [18.7,29.4] | [9.3,18.8]  | [4.1,16.4]   | [33.3,48.2] | [13.3,25.9] | [11.7,31.3]  | [15.6,27.7] | [5.3,12.7] | [6.1,19.1]  |

|                       |               |               |               |               |              |              |             |             |              |              |             |              |             |             |              |
|-----------------------|---------------|---------------|---------------|---------------|--------------|--------------|-------------|-------------|--------------|--------------|-------------|--------------|-------------|-------------|--------------|
| South Africa          | 67.2          | 41.3          | 25.8          | 58.9          | 39.8         | 19.1         | 25.3        | 29.4        | -4.1         | 33.6         | 10.4        | 23.2         | 8.3         | 1.5         | 6.8          |
|                       | [53.1,84.6]   | [19.0,87.6]   | [-11.6,63.3]  | [46.2,74.8]   | [18.0,85.8]  | [-18.3,56.4] | [18.0,35.5] | [10.3,81.3] | [-32.4,24.2] | [25.5,44.0]  | [3.3,32.5]  | [5.8,40.5]   | [4.4,15.6]  | [0.3,7.9]   | [2.1,11.4]   |
| South Sudan           | 94.2          | 105.0         | -10.8         | 76.8          | 87.8         | -11.0        | 34.7        | 38.6        | -3.9         | 42.1         | 49.2        | -7.1         | 17.4        | 17.2        | 0.2          |
|                       | [80.7,109.8]  | [92.7,118.8]  | [-28.4,6.8]   | [65.8,89.6]   | [75.7,101.7] | [-30.5,8.5]  | [27.0,44.5] | [31.4,47.4] | [-15.6,7.9]  | [34.4,51.5]  | [40.3,60.0] | [-21.8,7.6]  | [12.7,23.8] | [12.1,24.3] | [-8.9,9.3]   |
| Sudan                 | 80.7          | 42.6          | 38.0          | 70.3          | 38.0         | 32.4         | 36.7        | 25.7        | 11.0         | 33.7         | 12.2        | 21.4         | 10.4        | 4.7         | 5.7          |
|                       | [71.6,90.8]   | [36.3,50.0]   | [26.6,49.5]   | [61.9,79.8]   | [32.0,44.9]  | [21.5,43.2]  | [29.4,45.7] | [19.6,33.7] | [2.8,19.1]   | [28.6,39.6]  | [8.5,17.6]  | [14.0,28.8]  | [7.9,13.5]  | [2.8,7.9]   | [2.0,9.4]    |
| Swaziland             | 102.6         | 50.8          | 51.9          | 94.7          | 35.1         | 59.6         | 27.1        | 9.3         | 17.8         | 67.6         | 25.8        | 41.8         | 8.0         | 15.7        | -7.7         |
|                       | [83.7,125.2]  | [31.5,80.9]   | [19.6,84.1]   | [77.0,115.9]  | [22.6,54.3]  | [33.0,86.1]  | [18.5,39.7] | [3.7,23.3]  | [5.1,30.5]   | [53.6,84.9]  | [15.9,41.5] | [21.4,62.1]  | [3.9,16.2]  | [4.8,49.7]  | [-26.2,10.8] |
| Tanzania              | 77.6          | 72.8          | 4.9           | 60.1          | 67.9         | -7.7         | 20.2        | 37.3        | -17.1        | 39.9         | 30.5        | 9.3          | 17.5        | 4.9         | 12.6         |
|                       | [66.2,90.8]   | [61.9,85.3]   | [-12.7,22.4]  | [49.6,72.7]   | [57.7,79.7]  | [-23.2,7.7]  | [16.1,25.4] | [30.7,45.3] | [-28.3,-5.9] | [30.6,51.8]  | [22.9,40.6] | [-1.4,20.1]  | [12.7,24.1] | [2.5,9.6]   | [4.4,20.9]   |
| Uganda                | 88.4          | 52.6          | 35.7          | 69.3          | 44.5         | 24.8         | 27.8        | 25.7        | 2.1          | 41.5         | 18.7        | 22.8         | 19.1        | 8.2         | 10.9         |
|                       | [81.0,96.4]   | [44.0,62.8]   | [21.7,49.8]   | [62.8,76.5]   | [36.9,53.5]  | [12.7,37.0]  | [24.1,32.1] | [19.7,33.6] | [-7.3,11.5]  | [36.5,47.2]  | [14.7,23.8] | [16.6,28.9]  | [15.9,22.8] | [5.1,12.9]  | [5.7,16.2]   |
| Zambia                | 66.6          | 57.4          | 9.1           | 51.3          | 53.1         | -1.8         | 25.8        | 25.6        | 0.2          | 25.4         | 27.5        | -2.0         | 15.3        | 4.4         | 10.9         |
|                       | [57.1,77.4]   | [47.6,69.1]   | [-6.4,24.7]   | [43.1,60.9]   | [43.5,64.5]  | [-15.8,12.2] | [20.9,31.9] | [18.9,34.6] | [-10.9,11.4] | [19.2,33.6]  | [20.9,35.9] | [-11.4,7.3]  | [11.8,19.8] | [2.3,8.3]   | [6.6,15.2]   |
| Zimbabwe              | 91.1          | 51.0          | 40.1          | 75.2          | 43.4         | 31.8         | 35.3        | 26.2        | 9.1          | 40.0         | 17.2        | 22.7         | 15.8        | 7.6         | 8.3          |
|                       | [69.7,118.2]  | [40.3,64.3]   | [11.7,68.4]   | [59.6,94.5]   | [34.8,54.1]  | [9.7,53.9]   | [27.8,44.7] | [20.2,34.0] | [-4.3,22.5]  | [27.9,57.0]  | [12.4,23.9] | [5.7,39.7]   | [9.2,27.3]  | [4.5,12.8]  | [-0.9,17.5]  |
| West & Central Africa | 142.8         | 65.4          | 77.4          | 96.2          | 53.1         | 43.1         | 34.6        | 27.1        | 7.5          | 61.6         | 26.0        | 35.6         | 46.6        | 12.3        | 34.3         |
|                       | [137.4,148.4] | [61.5,69.6]   | [70.9,84.0]   | [92.6,99.9]   | [49.6,56.8]  | [37.9,48.3]  | [32.4,37.0] | [24.7,29.7] | [4.5,10.4]   | [58.8,64.4]  | [23.3,28.9] | [31.2,40.0]  | [43.4,50.0] | [11.2,13.6] | [30.9,37.7]  |
| Benin                 | 107.8         | 60.1          | 47.7          | 78.6          | 46.9         | 31.7         | 29.9        | 24.2        | 5.8          | 48.6         | 22.7        | 25.9         | 29.2        | 13.2        | 16.1         |
|                       | [98.2,118.3]  | [52.8,68.3]   | [34.5,61.0]   | [70.8,87.2]   | [40.0,54.9]  | [18.2,45.2]  | [25.2,35.5] | [18.3,31.8] | [-2.7,14.2]  | [42.6,55.5]  | [18.4,28.1] | [16.4,35.5]  | [24.4,35.1] | [10.4,16.7] | [9.3,22.9]   |
| Burkina Faso          | 174.8         | 96.6          | 78.3          | 125.3         | 70.5         | 54.9         | 33.1        | 25.4        | 7.6          | 92.3         | 45.0        | 47.2         | 49.5        | 26.1        | 23.4         |
|                       | [160.8,189.8] | [85.5,108.8]  | [61.4,95.2]   | [114.5,136.9] | [59.5,83.3]  | [40.3,69.4]  | [27.8,39.2] | [19.6,33.0] | [0.4,14.9]   | [82.5,103.1] | [37.5,53.9] | [35.7,58.7]  | [42.8,57.2] | [20.0,33.9] | [14.7,32.2]  |
| Cameroon              | 110.7         | 49.0          | 61.7          | 74.7          | 43.1         | 31.6         | 29.9        | 24.5        | 5.4          | 44.9         | 18.6        | 26.2         | 36.0        | 5.9         | 30.1         |
|                       | [96.7,126.4]  | [41.2,58.2]   | [42.8,80.6]   | [63.9,87.2]   | [36.0,51.6]  | [15.0,48.2]  | [22.9,38.9] | [18.5,32.4] | [-7.0,17.7]  | [37.8,53.2]  | [13.0,26.7] | [14.3,38.1]  | [28.8,44.9] | [3.7,9.5]   | [22.0,38.2]  |
| Chad                  | 160.6         | 138.2         | 22.4          | 120.5         | 98.5         | 22.0         | 35.5        | 36.8        | -1.3         | 85.0         | 61.8        | 23.3         | 40.1        | 39.7        | 0.4          |
|                       | [137.7,186.5] | [126.3,151.0] | [-3.2,48.0]   | [98.5,146.7]  | [89.7,108.1] | [-2.2,46.2]  | [29.6,42.5] | [31.4,43.0] | [-10.3,7.8]  | [66.5,108.2] | [54.7,69.7] | [3.5,43.1]   | [34.8,46.0] | [33.6,46.7] | [-7.5,8.3]   |
| Congo                 | 89.3          | 54.4          | 34.9          | 63.5          | 41.6         | 21.9         | 22.1        | 19.2        | 2.9          | 41.3         | 22.4        | 18.9         | 25.9        | 12.8        | 13.0         |
|                       | [82.4,96.8]   | [42.4,69.6]   | [17.1,52.7]   | [57.0,70.6]   | [30.9,55.8]  | [6.9,36.8]   | [18.5,26.5] | [11.6,31.6] | [-7.3,13.2]  | [35.5,48.0]  | [14.3,35.0] | [6.3,31.6]   | [22.3,30.0] | [6.8,24.2]  | [3.1,23.0]   |
| Congo (DR)            | 117.1         | 76.4          | 40.8          | 84.8          | 63.3         | 21.5         | 26.6        | 22.1        | 4.5          | 58.2         | 41.3        | 17.0         | 32.3        | 13.0        | 19.3         |
|                       | [103.5,132.3] | [67.0,86.9]   | [23.0,58.6]   | [75.0,95.8]   | [54.3,73.7]  | [4.2,38.9]   | [22.0,32.2] | [16.6,29.3] | [-4.4,13.5]  | [50.8,66.6]  | [32.2,52.6] | [2.8,31.1]   | [26.7,39.1] | [9.8,17.3]  | [12.8,25.7]  |
| Cote D'Ivoire         | 121.4         | 72.9          | 48.5          | 100.3         | 60.1         | 40.2         | 38.9        | 37.0        | 1.9          | 61.4         | 23.1        | 38.3         | 21.1        | 12.8        | 8.3          |
|                       | [111.6,132.0] | [57.3,92.3]   | [30.6,66.4]   | [90.0,111.6]  | [47.2,76.3]  | [23.6,56.8]  | [32.4,46.6] | [26.5,51.6] | [-13.1,16.8] | [54.0,69.9]  | [16.0,33.2] | [26.2,50.5]  | [16.6,26.8] | [6.9,23.4]  | [-0.1,16.8]  |
| Gabon                 | 75.3          | 50.3          | 25.0          | 51.7          | 47.4         | 4.3          | 20.9        | 19.5        | 1.4          | 30.8         | 27.9        | 2.9          | 23.6        | 2.9         | 20.7         |
|                       | [65.0,87.1]   | [32.3,77.6]   | [1.3,48.7]    | [44.3,60.4]   | [29.8,74.6]  | [-17.2,25.8] | [16.4,26.6] | [9.1,41.4]  | [-13.0,15.7] | [25.6,37.2]  | [15.6,49.3] | [-11.7,17.6] | [17.9,31.0] | [1.1,7.6]   | [13.2,28.2]  |
| Gambia                | 76.6          | 39.1          | 37.6          | 58.0          | 34.4         | 23.6         | 35.0        | 21.9        | 13.1         | 23.0         | 12.5        | 10.5         | 18.6        | 4.7         | 13.9         |
|                       | [65.6,89.4]   | [29.9,50.8]   | [24.3,50.9]   | [50.1,67.1]   | [25.4,46.4]  | [12.7,34.6]  | [29.3,41.9] | [14.6,32.9] | [2.4,23.8]   | [18.6,28.3]  | [7.1,21.7]  | [1.6,19.5]   | [13.4,25.7] | [2.0,10.6]  | [7.6,20.2]   |
| Ghana                 | 92.0          | 63.6          | 28.4          | 67.6          | 58.0         | 9.7          | 32.4        | 40.5        | -8.0         | 35.2         | 17.5        | 17.7         | 24.4        | 5.6         | 18.8         |
|                       | [81.0,104.4]  | [50.6,79.7]   | [5.2,51.7]    | [57.6,79.2]   | [45.1,74.2]  | [-11.9,31.2] | [25.3,41.4] | [29.3,55.5] | [-23.9,7.8]  | [28.3,43.8]  | [11.4,26.7] | [6.0,29.5]   | [19.3,30.9] | [2.1,15.0]  | [10.8,26.7]  |
| Guinea                | 132.9         | 44.4          | 88.5          | 95.1          | 38.1         | 57.0         | 36.3        | 22.3        | 14.1         | 58.8         | 15.8        | 43.0         | 37.8        | 6.3         | 31.5         |
|                       | [114.1,154.3] | [34.2,57.4]   | [68.8,108.3]  | [80.9,111.5]  | [28.8,50.2]  | [40.8,73.2]  | [28.7,46.0] | [15.1,32.8] | [1.5,26.6]   | [48.6,70.9]  | [11.0,22.6] | [32.1,53.9]  | [30.3,47.2] | [3.4,11.7]  | [23.6,39.4]  |
| Liberia               | 129.8         | 99.4          | 30.4          | 102.7         | 78.2         | 24.5         | 38.0        | 32.4        | 5.6          | 64.6         | 45.7        | 18.9         | 27.2        | 21.2        | 6.0          |
|                       | [114.2,147.3] | [81.2,121.1]  | [4.9,56.0]    | [91.4,115.1]  | [62.0,98.1]  | [1.7,47.3]   | [31.9,45.3] | [22.6,46.3] | [-6.1,17.2]  | [56.3,74.1]  | [34.4,60.6] | [2.7,35.2]   | [19.8,37.2] | [13.6,33.1] | [-5.8,17.7]  |
| Mali                  | 142.6         | 57.3          | 85.3          | 98.3          | 42.8         | 55.6         | 41.8        | 23.9        | 17.9         | 56.6         | 18.9        | 37.7         | 44.3        | 14.5        | 29.8         |
|                       | [128.6,157.9] | [47.7,68.6]   | [69.2,101.5]  | [86.8,111.2]  | [36.0,50.7]  | [42.6,68.5]  | [33.7,51.7] | [18.3,31.1] | [8.2,27.6]   | [48.4,66.0]  | [14.2,25.1] | [29.7,45.6]  | [37.4,52.4] | [9.9,21.2]  | [22.1,37.5]  |
| Mauritania            | 67.5          | 39.7          | 27.8          | 53.0          | 34.9         | 18.1         | 33.8        | 20.7        | 13.1         | 19.2         | 14.2        | 5.0          | 14.5        | 4.8         | 9.7          |
|                       | [56.8,80.2]   | [32.2,48.9]   | [15.3,40.4]   | [44.6,62.9]   | [27.4,44.3]  | [6.1,30.2]   | [28.2,40.5] | [16.1,26.6] | [2.0,24.2]   | [14.4,25.6]  | [9.2,21.9]  | [-2.2,12.3]  | [10.4,20.2] | [2.3,10.0]  | [3.8,15.6]   |
| Niger                 | 143.9         | 113.7         | 30.2          | 90.2          | 73.5         | 16.7         | 34.8        | 27.5        | 7.3          | 55.4         | 46.0        | 9.4          | 53.7        | 40.2        | 13.4         |
|                       | [129.0,160.1] | [99.2,130.1]  | [10.3,50.0]   | [78.8,103.0]  | [64.5,83.6]  | [1.2,32.2]   | [28.7,42.1] | [22.4,33.9] | [-0.5,15.1]  | [46.0,66.5]  | [39.1,54.0] | [-1.5,20.4]  | [46.7,61.7] | [32.1,50.3] | [3.5,23.4]   |
| Nigeria               | 172.8         | 53.4          | 119.4         | 108.7         | 45.6         | 63.0         | 38.9        | 27.7        | 11.2         | 69.8         | 17.9        | 51.9         | 64.1        | 7.8         | 56.3         |
|                       | [161.3,184.9] | [48.2,59.1]   | [105.8,133.0] | [101.0,116.9] | [40.7,51.1]  | [54.6,71.5]  | [34.8,43.3] | [23.5,32.7] | [5.8,16.5]   | [63.8,76.3]  | [15.1,21.2] | [45.1,58.7]  | [57.4,71.5] | [6.0,10.1]  | [48.6,64.1]  |

|                               |               |              |              |              |             |             |             |             |              |             |             |             |             |             |             |
|-------------------------------|---------------|--------------|--------------|--------------|-------------|-------------|-------------|-------------|--------------|-------------|-------------|-------------|-------------|-------------|-------------|
| Sao Tome & Principe           | 62.5          | 18.3         | 44.2         | 42.8         | 17.8        | 25.0        | 16.1        | 11.0        | 5.1          | 26.6        | 6.8         | 19.8        | 19.7        | 0.5         | 19.2        |
|                               | [45.3,85.6]   | [8.5,39.2]   | [20.9,67.4]  | [31.2,58.3]  | [8.0,39.0]  | [6.3,43.6]  | [10.1,25.7] | [4.2,29.0]  | [-8.5,18.7]  | [17.9,39.5] | [1.8,24.8]  | [7.0,32.7]  | [10.2,37.9] | [0.1,2.9]   | [8.7,29.8]  |
| Senegal                       | 72.1          | 27.2         | 45.0         | 56.0         | 26.1        | 29.9        | 27.3        | 20.1        | 7.3          | 28.6        | 6.0         | 22.6        | 16.2        | 1.1         | 15.1        |
|                               | [58.1,89.2]   | [17.8,41.2]  | [27.5,62.4]  | [45.5,68.6]  | [16.8,40.3] | [15.4,44.4] | [22.5,33.3] | [11.8,33.8] | [-4.2,18.8]  | [20.9,39.1] | [2.7,13.2]  | [12.8,32.5] | [11.1,23.6] | [0.3,4.7]   | [9.0,21.1]  |
| Sierra Leone                  | 144.8         | 89.1         | 55.7         | 108.1        | 74.5        | 33.7        | 29.7        | 33.2        | -3.4         | 78.4        | 41.3        | 37.1        | 36.6        | 14.6        | 22.0        |
|                               | [130.3,160.5] | [74.4,106.4] | [35.9,75.4]  | [95.5,122.2] | [61.7,89.6] | [16.1,51.2] | [24.2,36.5] | [24.7,44.4] | [-15.2,8.3]  | [68.2,90.1] | [33.0,51.6] | [22.8,51.4] | [29.7,45.1] | [10.5,20.3] | [12.2,31.8] |
| Togo                          | 97.4          | 43.8         | 53.6         | 64.0         | 33.9        | 30.1        | 24.2        | 26.7        | -2.5         | 39.8        | 7.2         | 32.7        | 33.3        | 9.9         | 23.4        |
|                               | [78.0,120.9]  | [32.1,59.6]  | [30.0,77.1]  | [53.9,75.8]  | [24.6,46.5] | [14.9,45.3] | [17.5,33.4] | [18.5,38.4] | [-13.9,8.8]  | [31.4,50.4] | [3.6,14.1]  | [23.0,42.3] | [21.2,52.0] | [4.7,20.6]  | [5.4,41.5]  |
| Latin America & Caribbean     | 41.7          | 18.8         | 22.9         | 36.3         | 17.3        | 19.0        | 17.5        | 11.4        | 6.2          | 18.8        | 5.9         | 12.9        | 5.4         | 1.5         | 3.9         |
|                               | [39.3,44.4]   | [15.9,22.2]  | [18.1,27.8]  | [34.1,38.7]  | [14.4,20.8] | [14.4,23.6] | [15.8,19.5] | [9.6,13.5]  | [3.0,9.3]    | [17.2,20.5] | [4.1,8.6]   | [9.7,16.0]  | [4.6,6.3]   | [1.0,2.2]   | [2.5,5.3]   |
| Colombia                      | 27.2          | 6.8          | 20.3         | 24.9         | 6.0         | 18.8        | 12.1        | 4.7         | 7.4          | 12.8        | 1.3         | 11.5        | 2.3         | 0.8         | 1.5         |
|                               | [22.4,32.9]   | [3.4,13.6]   | [11.6,29.1]  | [20.2,30.6]  | [2.8,12.9]  | [10.6,27.1] | [8.4,17.4]  | [2.0,10.9]  | [1.3,13.5]   | [9.9,16.5]  | [0.4,4.3]   | [7.7,15.2]  | [1.4,3.9]   | [0.2,3.2]   | [-0.0,3.0]  |
| Dominican Republic            | 34.3          | 26.4         | 7.9          | 30.7         | 26.1        | 4.7         | 20.6        | 23.2        | -2.6         | 10.1        | 2.9         | 7.3         | 3.6         | 0.3         | 3.3         |
|                               | [29.7,39.7]   | [19.0,36.5]  | [-2.8,18.7]  | [26.6,35.5]  | [18.7,36.3] | [-5.9,15.3] | [17.5,24.3] | [16.3,32.9] | [-12.6,7.5]  | [7.6,13.6]  | [1.4,5.9]   | [4.0,10.5]  | [2.1,6.0]   | [0.1,1.5]   | [1.5,5.1]   |
| El Salvador                   | 30.7          | 13.2         | 17.5         | 26.0         | 12.8        | 13.2        | 12.1        | 9.6         | 2.5          | 13.9        | 3.3         | 10.7        | 4.7         | 0.3         | 4.4         |
|                               | [22.8,41.4]   | [6.5,26.4]   | [5.1,30.0]   | [18.8,35.9]  | [6.3,26.2]  | [1.0,25.3]  | [7.4,19.6]  | [4.2,21.8]  | [-7.3,12.3]  | [9.5,20.3]  | [1.0,11.0]  | [5.2,16.1]  | [2.3,9.4]   | [0.1,1.7]   | [0.4,8.4]   |
| Guatemala                     | 56.0          | 20.1         | 36.0         | 49.6         | 18.0        | 31.6        | 24.1        | 12.8        | 11.3         | 25.5        | 5.2         | 20.3        | 6.4         | 2.0         | 4.4         |
|                               | [49.4,63.5]   | [15.2,26.4]  | [27.1,44.8]  | [43.4,56.6]  | [13.3,24.3] | [23.5,39.6] | [20.0,28.9] | [9.2,17.8]  | [5.3,17.2]   | [21.2,30.7] | [3.2,8.5]   | [13.2,27.4] | [4.4,9.4]   | [0.8,5.0]   | [1.0,7.9]   |
| Guyana                        | 39.4          | 30.6         | 8.7          | 36.0         | 26.7        | 9.3         | 18.1        | 24.2        | -6.1         | 17.9        | 2.5         | 15.4        | 3.4         | 3.9         | -0.6        |
|                               | [28.9,53.4]   | [19.3,48.4]  | [-10.4,27.9] | [26.4,48.9]  | [17.0,41.6] | [-7.9,26.4] | [10.5,31.0] | [14.6,39.7] | [-23.1,10.9] | [12.1,26.3] | [0.8,8.3]   | [9.6,21.1]  | [1.4,8.1]   | [0.7,21.1]  | [-6.7,5.5]  |
| Haiti                         | 93.3          | 58.6         | 34.7         | 75.4         | 50.9        | 24.5        | 27.6        | 31.3        | -3.7         | 47.8        | 19.6        | 28.2        | 17.8        | 7.7         | 10.2        |
|                               | [77.0,112.5]  | [45.4,75.4]  | [17.9,51.4]  | [60.4,93.8]  | [37.4,69.1] | [7.5,41.5]  | [20.2,37.6] | [21.7,44.9] | [-18.3,10.8] | [37.6,60.6] | [10.8,35.2] | [15.2,41.2] | [13.3,23.9] | [3.6,16.1]  | [4.3,16.1]  |
| Honduras                      | 38.9          | 20.2         | 18.7         | 32.9         | 19.5        | 13.4        | 19.0        | 12.5        | 6.5          | 13.9        | 7.0         | 7.0         | 6.0         | 0.8         | 5.2         |
|                               | [33.3,45.4]   | [15.0,27.4]  | [10.0,27.4]  | [27.7,39.1]  | [14.2,26.6] | [4.9,22.0]  | [15.0,24.1] | [8.3,18.8]  | [0.1,12.8]   | [11.0,17.5] | [4.1,11.7]  | [1.9,12.0]  | [4.0,8.9]   | [0.1,5.0]   | [2.7,7.8]   |
| Paraguay                      | 29.5          | 4.5          | 25.0         | 28.3         | 4.5         | 23.8        | 12.2        | 3.7         | 8.5          | 16.1        | 0.8         | 15.3        | 1.2         | NA          | NA          |
|                               | [20.7,42.0]   | [1.7,11.6]   | [15.2,34.8]  | [19.6,40.6]  | [1.7,11.6]  | [14.1,33.4] | [7.0,21.2]  | [1.4,10.3]  | [1.6,15.4]   | [10.1,25.6] | [0.1,4.8]   | [6.6,24.0]  | [0.4,4.0]   |             |             |
| Peru                          | 35.8          | 14.2         | 21.6         | 31.1         | 13.9        | 17.2        | 16.2        | 5.6         | 10.5         | 14.9        | 8.3         | 6.7         | 4.7         | 0.3         | 4.4         |
|                               | [31.8,40.3]   | [7.2,28.0]   | [11.2,32.0]  | [27.4,35.2]  | [6.9,27.9]  | [7.3,27.0]  | [13.1,20.0] | [3.0,10.8]  | [5.1,16.0]   | [12.2,18.3] | [2.7,25.4]  | [-1.7,15.0] | [3.3,6.7]   | [0.0,2.0]   | [2.3,6.6]   |
| Suriname                      | 20.5          | 10.5         | 10.0         | 17.7         | 10.5        | 7.2         | 13.4        | 6.5         | 6.9          | 4.2         | 4.0         | 0.2         | 2.8         | NA          | NA          |
|                               | [13.3,31.2]   | [3.5,31.1]   | [-3.1,23.0]  | [11.6,26.9]  | [3.5,31.1]  | [-4.2,18.5] | [8.2,21.8]  | [1.9,22.6]  | [0.3,13.5]   | [1.7,10.5]  | [0.9,17.3]  | [-8.2,8.6]  | [1.2,6.7]   |             |             |
| Low-Income Countries          | 103.7         | 65.6         | 38.0         | 78.8         | 54.2        | 24.6        | 31.6        | 26.8        | 4.8          | 47.2        | 27.4        | 19.8        | 24.8        | 11.4        | 13.4        |
|                               | [99.2,108.3]  | [62.0,69.4]  | [31.8,44.3]  | [75.1,82.7]  | [50.7,58.0] | [19.1,30.0] | [29.4,34.0] | [24.3,29.6] | [1.2,8.4]    | [44.5,50.1] | [24.9,30.2] | [16.2,23.5] | [23.3,26.4] | [10.1,12.9] | [11.5,15.3] |
| Lower-Middle-Income Countries | 85.9          | 35.5         | 50.4         | 68.6         | 31.9        | 36.7        | 36.8        | 21.2        | 15.6         | 31.8        | 10.8        | 21.0        | 17.3        | 3.5         | 13.8        |
|                               | [83.0,88.8]   | [33.8,37.2]  | [47.7,53.2]  | [66.7,70.5]  | [30.3,33.6] | [34.1,39.2] | [35.8,37.9] | [20.0,22.5] | [13.7,17.5]  | [30.2,33.4] | [9.9,11.6]  | [19.4,22.7] | [15.9,18.8] | [3.1,4.0]   | [12.6,14.9] |
| Upper-Middle-Income Countries | 44.4          | 21.1         | 23.3         | 38.8         | 19.4        | 19.5        | 19.1        | 11.7        | 7.4          | 19.7        | 7.6         | 12.1        | 5.6         | 1.8         | 3.8         |
|                               | [41.5,47.5]   | [17.4,25.7]  | [18.1,28.4]  | [36.2,41.6]  | [15.9,23.6] | [14.5,24.4] | [17.2,21.3] | [8.9,15.4]  | [3.4,11.3]   | [17.6,22.1] | [6.1,9.5]   | [8.9,15.3]  | [4.3,7.2]   | [1.1,2.9]   | [2.3,5.3]   |

Notes: 95% confidence intervals are shown in brackets. 'Worst' refers to children in the 20% of households with the worst living standards and 'Best' refers to children in the 20% of households with the best living standards, within each country.

**eTable 8.** Shares of Deaths Among Children Younger Than 5 Years Occurring at Different Ages by Living Standards

|                           | 0–23 months |             |              | Neonates    |             |               | 1–23 months |             |              | 24–59 months |             |              |
|---------------------------|-------------|-------------|--------------|-------------|-------------|---------------|-------------|-------------|--------------|--------------|-------------|--------------|
|                           | Worst       | Best        | Difference   | Worst       | Best        | Difference    | Worst       | Best        | Difference   | Worst        | Best        | Difference   |
| Pooled                    | 79.5        | 87.7        | -8.2         | 39.9        | 52.8        | -13.0         | 39.6        | 34.8        | 4.8          | 20.5         | 12.3        | 8.2          |
|                           | [78.6,80.3] | [86.7,88.6] | [-9.2,-7.3]  | [38.7,41.0] | [51.2,54.5] | [-15.4,-10.5] | [38.5,40.7] | [33.2,36.5] | [2.3,7.2]    | [19.7,21.4]  | [11.4,13.3] | [7.3,9.2]    |
| Least Developed Countries | 77.5        | 84.3        | -6.7         | 32.7        | 44.1        | -11.4         | 44.8        | 40.1        | 4.7          | 22.5         | 15.7        | 6.7          |
|                           | [76.6,78.5] | [82.7,85.7] | [-8.8,-4.6]  | [31.4,34.0] | [41.2,47.1] | [-14.3,-8.5]  | [43.6,46.1] | [37.3,43.0] | [1.8,7.6]    | [21.5,23.4]  | [14.3,17.3] | [4.6,8.8]    |
| East Asia & Pacific       | 85.4        | 90.5        | -5.0         | 40.5        | 56.5        | -16.0         | 45.0        | 34.0        | 11.0         | 14.6         | 9.5         | 5.0          |
|                           | [83.0,87.6] | [84.8,94.2] | [-8.9,-1.2]  | [36.7,44.4] | [48.5,64.2] | [-23.3,-8.8]  | [41.1,48.8] | [27.3,41.3] | [3.3,18.7]   | [12.4,17.0]  | [5.8,15.2]  | [1.2,8.9]    |
| Cambodia                  | 88.1        | 90.0        | -1.9         | 35.1        | 62.8        | -27.7         | 53.0        | 27.2        | 25.8         | 11.9         | 10.0        | 1.9          |
|                           | [81.0,92.8] | [75.0,96.4] | [-11.5,7.7]  | [27.3,43.7] | [46.1,76.9] | [-45.6,-9.8]  | [43.6,62.2] | [15.1,43.9] | [10.4,41.3]  | [7.2,19.0]   | [3.6,25.0]  | [-7.7,11.5]  |
| Indonesia                 | 86.4        | 89.8        | -3.5         | 43.0        | 52.8        | -9.8          | 43.3        | 37.0        | 6.3          | 13.6         | 10.2        | 3.5          |
|                           | [80.8,90.5] | [82.7,94.2] | [-11.0,4.0]  | [36.9,49.4] | [43.3,62.2] | [-20.5,1.0]   | [37.7,49.1] | [28.2,46.8] | [-5.8,18.4]  | [9.5,19.2]   | [5.8,17.3]  | [-4.0,11.0]  |
| Lao                       | 91.1        | 87.0        | 4.0          | 35.3        | 68.3        | -33.1         | 55.8        | 18.7        | 37.1         | 8.9          | 13.0        | -4.0         |
|                           | [88.1,93.4] | [72.4,94.5] | [-10.2,18.3] | [31.0,39.8] | [52.3,80.9] | [-49.4,-16.7] | [50.5,61.0] | [9.2,34.2]  | [24.3,49.9]  | [6.6,11.9]   | [5.5,27.6]  | [-18.3,10.2] |
| Mongolia                  | 85.2        | 76.4        | 8.9          | 45.5        | 45.4        | 0.2           | 39.7        | 31.0        | 8.7          | 14.8         | 23.6        | -8.9         |
|                           | [71.6,92.9] | [40.2,93.9] | [-22.8,40.5] | [33.8,57.8] | [23.1,69.7] | [-23.6,23.9]  | [28.6,52.0] | [13.7,55.9] | [-17.0,34.4] | [7.1,28.4]   | [6.1,59.8]  | [-40.5,22.8] |
| Myanmar                   | 85.7        | 92.4        | -6.7         | 35.5        | 66.0        | -30.5         | 50.2        | 26.4        | 23.8         | 14.3         | 7.6         | 6.7          |
|                           | [79.1,90.4] | [70.5,98.4] | [-18.9,5.5]  | [29.5,41.9] | [42.5,83.5] | [-52.9,-8.1]  | [43.5,56.9] | [12.0,48.6] | [0.1,47.4]   | [9.6,20.9]   | [1.6,29.5]  | [-5.5,18.9]  |
| Papua New Guinea          | 79.0        | 86.2        | -7.2         | 41.5        | 54.8        | -13.4         | 37.6        | 31.3        | 6.2          | 21.0         | 13.8        | 7.2          |
|                           | [70.7,85.5] | [76.8,92.2] | [-17.2,2.9]  | [33.6,49.7] | [46.4,63.0] | [-28.0,1.2]   | [29.6,46.2] | [24.8,38.7] | [-6.6,19.1]  | [14.5,29.3]  | [7.8,23.2]  | [-2.9,17.2]  |
| Philippines               | 83.1        | 95.7        | -12.6        | 42.7        | 68.0        | -25.3         | 40.5        | 27.7        | 12.7         | 16.9         | 4.3         | 12.6         |
|                           | [76.6,88.1] | [73.4,99.5] | [-21.2,-4.0] | [34.7,51.0] | [41.8,86.2] | [-47.0,-3.7]  | [35.1,46.1] | [11.3,53.6] | [-8.4,33.8]  | [11.9,23.4]  | [0.5,26.6]  | [4.0,21.2]   |
| Timor-Leste               | 73.6        | 81.1        | -7.5         | 30.7        | 66.0        | -35.3         | 42.9        | 15.1        | 27.8         | 26.4         | 18.9        | 7.5          |
|                           | [64.3,81.2] | [66.7,90.2] | [-19.9,4.9]  | [23.2,39.5] | [50.2,79.0] | [-50.6,-20.0] | [36.6,49.5] | [7.6,27.7]  | [14.0,41.7]  | [18.8,35.7]  | [9.8,33.3]  | [-4.9,19.9]  |
| Tonga                     | NA          | NA          | NA           | 37.3        | NA          | NA            | 62.7        | NA          | NA           | NA           | NA          | NA           |
|                           |             |             |              | [9.6,77.0]  |             |               | [23.0,90.4] |             |              |              |             |              |
| South Asia                | 86.9        | 92.0        | -5.1         | 54.3        | 65.8        | -11.5         | 32.6        | 26.2        | 6.4          | 13.1         | 8.0         | 5.1          |
|                           | [85.8,87.9] | [89.2,94.1] | [-7.5,-2.7]  | [53.0,55.6] | [62.4,69.1] | [-15.5,-7.6]  | [31.1,34.1] | [23.5,29.0] | [3.1,9.8]    | [12.1,14.2]  | [5.9,10.8]  | [2.7,7.5]    |
| Afghanistan               | 88.0        | 91.2        | -3.2         | 39.9        | 43.2        | -3.3          | 48.1        | 48.0        | 0.1          | 12.0         | 8.8         | 3.2          |
|                           | [84.4,90.9] | [86.1,94.6] | [-7.6,1.2]   | [34.3,45.7] | [32.8,54.3] | [-19.4,12.7]  | [42.5,53.8] | [35.8,60.5] | [-15.7,15.9] | [9.1,15.6]   | [5.4,13.9]  | [-1.2,7.6]   |
| Bangladesh                | 88.0        | 91.1        | -3.1         | 59.7        | 66.7        | -7.0          | 28.2        | 24.4        | 3.9          | 12.0         | 8.9         | 3.1          |
|                           | [85.0,90.5] | [86.4,94.3] | [-8.1,1.9]   | [55.2,64.2] | [57.9,74.5] | [-14.8,0.9]   | [23.9,33.0] | [17.4,33.0] | [-4.2,11.9]  | [9.5,15.0]   | [5.7,13.6]  | [-1.9,8.1]   |
| India                     | 86.8        | 91.3        | -4.5         | 55.3        | 62.9        | -7.6          | 31.5        | 28.4        | 3.1          | 13.2         | 8.7         | 4.5          |
|                           | [86.1,87.5] | [88.9,93.3] | [-7.4,-1.7]  | [53.8,56.8] | [59.5,66.3] | [-10.7,-4.6]  | [30.3,32.8] | [25.0,32.0] | [0.2,6.0]    | [12.5,13.9]  | [6.7,11.1]  | [-1.7,7.4]   |
| Maldives                  | 77.7        | 91.1        | -13.4        | 53.0        | 91.1        | -38.1         | 24.7        | NA          | NA           | 22.3         | 8.9         | 13.4         |
|                           | [60.5,88.8] | [49.7,99.1] | [-45.0,18.1] | [35.9,69.5] | [49.7,99.1] | [-68.7,-7.6]  | [13.8,40.3] |             |              | [11.2,39.5]  | [0.9,50.3]  | [-18.1,45.0] |
| Nepal                     | 89.1        | 76.9        | 12.2         | 55.3        | 65.0        | -9.7          | 33.9        | 11.9        | 21.9         | 10.9         | 23.1        | -12.2        |
|                           | [80.7,94.2] | [35.2,95.3] | [-16.0,40.4] | [43.3,66.7] | [31.0,88.5] | [-39.0,19.5]  | [24.3,44.9] | [3.4,34.4]  | [6.4,37.5]   | [5.8,19.3]   | [4.7,64.8]  | [-40.4,16.0] |
| Pakistan                  | 86.5        | 94.1        | -7.6         | 51.2        | 75.0        | -23.8         | 35.2        | 19.1        | 16.2         | 13.5         | 5.9         | 7.6          |
|                           | [82.9,89.3] | [85.9,97.6] | [-13.7,-1.6] | [44.5,57.9] | [63.0,84.1] | [-33.6,-14.0] | [28.2,42.9] | [12.3,28.5] | [7.1,25.2]   | [10.7,17.1]  | [2.4,14.1]  | [1.6,13.7]   |
| Europe & Central Asia     | 91.7        | 95.5        | -3.8         | 43.5        | 45.9        | -2.4          | 48.2        | 49.7        | -1.5         | 8.3          | 4.5         | 3.8          |
|                           | [83.9,95.9] | [87.5,98.5] | [-11.2,3.5]  | [34.8,52.5] | [24.6,68.7] | [-22.8,18.0]  | [39.9,56.6] | [26.7,72.7] | [-24.6,21.7] | [4.1,16.1]   | [1.5,12.5]  | [-3.5,11.2]  |
| Albania                   | 96.2        | NA          | NA           | 36.4        | NA          | NA            | 59.8        | NA          | NA           | 3.8          | NA          | NA           |
|                           | [76.4,99.5] |             |              | [13.9,67.0] |             |               | [29.3,84.3] |             |              | [0.5,23.6]   |             |              |
| Armenia                   | NA          | NA          | NA           | 27.4        | 47.8        | -20.4         | 72.6        | 52.2        | 20.4         | NA           | NA          | NA           |
|                           |             |             |              | [8.7,60.0]  | [6.6,92.2]  | [-84.8,44.0]  | [40.0,91.3] | [7.8,93.4]  | [-44.0,84.8] |              |             |              |
| Kyrgyz Republic           | 99.2        | 95.4        | 3.8          | 59.9        | 72.5        | -12.6         | 39.3        | 22.9        | 16.4         | 0.8          | 4.6         | -3.8         |
|                           | [95.0,99.9] | [74.2,99.3] | [-7.0,14.6]  | [35.7,80.0] | [48.5,88.1] | [-50.0,24.8]  | [19.4,63.5] | [9.2,46.4]  | [-22.6,55.5] | [0.1,5.0]    | [0.7,25.8]  | [-14.6,7.0]  |
| Moldova                   | NA          | NA          | NA           | 75.3        | 81.7        | -6.4          | 24.7        | 18.3        | 6.4          | NA           | NA          | NA           |

|                            |             |              |              |             |             |               |             |             |              |             |             |              |
|----------------------------|-------------|--------------|--------------|-------------|-------------|---------------|-------------|-------------|--------------|-------------|-------------|--------------|
|                            |             |              |              | [41.2,93.0] | [41.5,96.6] | [-35.3,22.6]  | [7.0,58.8]  | [3.4,58.5]  | [-22.6,35.3] |             |             |              |
| Tajikistan                 | 96.7        | 95.8         | 0.9          | 42.1        | 58.8        | -16.7         | 54.5        | 36.9        | 17.6         | 3.3         | 4.2         | -0.9         |
|                            | [90.6,98.9] | [87.0,98.7]  | [-3.7,5.5]   | [32.1,52.8] | [44.0,72.2] | [-35.5,2.1]   | [44.3,64.4] | [23.9,52.2] | [-0.9,36.2]  | [1.1,9.4]   | [1.3,13.0]  | [-5.5,3.7]   |
| Turkey                     | 89.8        | 95.8         | -6.1         | 40.1        | 22.5        | 17.5          | 49.7        | 73.3        | -23.6        | 10.2        | 4.2         | 6.1          |
|                            | [78.4,95.5] | [9.6,100.0]  | [-20.8,8.7]  | [27.5,54.1] | [3.3,71.0]  | [-22.0,57.1]  | [36.0,63.5] | [28.8,94.9] | [-63.9,16.7] | [4.5,21.6]  | [0.0,90.4]  | [-8.7,20.8]  |
| Turkmenistan               | 86.3        | 92.6         | -6.3         | 53.5        | 71.0        | -17.6         | 32.8        | 21.6        | 11.3         | 13.7        | 7.4         | 6.3          |
|                            | [75.0,92.9] | [75.6,98.0]  | [-20.3,7.7]  | [41.2,65.4] | [54.5,83.3] | [-39.9,4.8]   | [21.2,47.0] | [10.6,39.0] | [-11.1,33.6] | [7.1,25.0]  | [2.0,24.4]  | [-7.7,20.3]  |
| Middle East & North Africa | 90.1        | 93.5         | -3.4         | 50.0        | 56.3        | -6.3          | 40.1        | 37.2        | 2.9          | 9.9         | 6.5         | 3.4          |
|                            | [87.7,92.1] | [89.0,96.3]  | [-7.1,0.2]   | [45.9,54.2] | [49.8,62.6] | [-13.7,1.1]   | [36.4,43.9] | [31.4,43.5] | [-4.9,10.7]  | [7.9,12.3]  | [3.7,11.0]  | [-0.2,7.1]   |
| Egypt                      | 91.4        | 96.9         | -5.5         | 54.7        | 57.9        | -3.2          | 36.8        | 39.1        | -2.3         | 8.6         | 3.1         | 5.5          |
|                            | [85.6,95.1] | [87.0,99.3]  | [-12.4,1.4]  | [47.4,61.7] | [47.5,67.5] | [-16.6,10.2]  | [30.4,43.7] | [29.7,49.3] | [-15.8,11.3] | [4.9,14.4]  | [0.7,13.0]  | [-1.4,12.4]  |
| Iraq                       | 87.1        | 87.5         | -0.4         | 52.4        | 48.9        | 3.6           | 34.7        | 38.6        | -4.0         | 12.9        | 12.5        | 0.4          |
|                            | [83.4,90.0] | [75.6,94.0]  | [-11.9,11.1] | [46.4,58.4] | [36.4,61.5] | [-11.3,18.4]  | [29.2,40.5] | [27.3,51.3] | [-16.6,8.7]  | [10.0,16.6] | [6.0,24.4]  | [-11.1,11.9] |
| Jordan                     | 92.9        | 99.4         | -6.5         | 51.8        | 66.9        | -15.2         | 41.2        | 32.5        | 8.7          | 7.1         | 0.6         | 6.5          |
|                            | [86.7,96.4] | [92.2,100.0] | [-11.8,-1.2] | [36.4,66.8] | [37.3,87.3] | [-41.3,11.0]  | [26.2,57.9] | [12.4,62.0] | [-17.6,35.0] | [3.6,13.3]  | [0.0,7.8]   | [1.2,11.8]   |
| State of Palestine         | 95.6        | 87.1         | 8.5          | 43.8        | 39.4        | 4.4           | 51.8        | 47.7        | 4.1          | 4.4         | 12.9        | -8.5         |
|                            | [88.2,98.4] | [72.8,94.5]  | [-2.9,19.9]  | [32.6,55.7] | [28.3,51.8] | [-14.5,23.3]  | [39.2,64.1] | [33.4,62.4] | [-15.5,23.7] | [1.6,11.8]  | [5.5,27.2]  | [-19.9,2.9]  |
| Tunisia                    | 88.1        | 87.6         | 0.5          | 58.8        | 57.1        | 1.7           | 29.3        | 30.5        | -1.1         | 11.9        | 12.4        | -0.5         |
|                            | [68.7,96.2] | [48.4,98.2]  | [-28.6,29.6] | [38.9,76.1] | [24.2,84.7] | [-42.2,45.5]  | [16.5,46.7] | [8.5,67.4]  | [-42.7,40.4] | [3.8,31.3]  | [1.8,51.6]  | [-29.6,28.6] |
| Yemen                      | 89.5        | 92.7         | -3.2         | 41.3        | 59.1        | -17.8         | 48.3        | 33.6        | 14.6         | 10.5        | 7.3         | 3.2          |
|                            | [86.6,91.9] | [87.1,96.0]  | [-7.2,0.8]   | [35.3,47.5] | [47.1,70.1] | [-30.0,-5.7]  | [42.0,54.6] | [23.8,45.1] | [2.6,26.7]   | [8.1,13.4]  | [4.0,12.9]  | [-0.8,7.2]   |
| Eastern & Southern Africa  | 78.8        | 88.1         | -9.3         | 34.3        | 50.3        | -16.0         | 44.4        | 37.8        | 6.7          | 21.2        | 11.9        | 9.3          |
|                            | [77.1,80.4] | [86.0,89.9]  | [-12.3,-6.3] | [31.9,36.9] | [46.0,54.6] | [-20.3,-11.7] | [42.1,46.8] | [33.7,42.0] | [2.5,10.9]   | [19.6,22.9] | [10.1,14.0] | [6.3,12.3]   |
| Angola                     | 72.6        | 74.2         | -1.6         | 30.4        | 29.7        | 0.7           | 42.2        | 44.5        | -2.3         | 27.4        | 25.8        | 1.6          |
|                            | [68.4,76.5] | [63.7,82.6]  | [-12.6,9.4]  | [24.2,37.5] | [19.4,42.7] | [-12.5,13.9]  | [36.2,48.4] | [33.6,56.0] | [-15.6,11.0] | [23.5,31.6] | [17.4,36.3] | [-9.4,12.6]  |
| Burundi                    | 75.2        | 82.8         | -7.6         | 28.4        | 40.6        | -12.2         | 46.8        | 42.2        | 4.7          | 24.8        | 17.2        | 7.6          |
|                            | [71.3,78.7] | [76.3,87.8]  | [-14.8,-0.4] | [24.0,33.3] | [34.2,47.4] | [-20.8,-3.7]  | [41.3,52.4] | [36.4,48.1] | [-2.9,12.2]  | [21.3,28.7] | [12.2,23.7] | [0.4,14.8]   |
| Comoros                    | 75.8        | 95.5         | -19.7        | 36.4        | 56.7        | -20.3         | 39.4        | 38.8        | 0.6          | 24.2        | 4.5         | 19.7         |
|                            | [57.1,88.1] | [75.1,99.3]  | [-41.1,1.6]  | [22.8,52.6] | [31.8,78.6] | [-49.7,9.0]   | [22.7,59.1] | [17.9,64.9] | [-27.8,29.0] | [11.9,42.9] | [0.7,24.9]  | [-1.6,41.1]  |
| Ethiopia                   | 79.6        | 91.1         | -11.5        | 40.4        | 60.0        | -19.6         | 39.2        | 31.1        | 8.1          | 20.4        | 8.9         | 11.5         |
|                            | [74.4,84.0] | [77.7,96.8]  | [-20.9,-2.0] | [31.4,50.2] | [44.6,73.7] | [-34.7,-4.5]  | [31.2,47.8] | [20.7,43.8] | [-4.3,20.6]  | [16.0,25.6] | [3.2,22.3]  | [2.0,20.9]   |
| Kenya                      | 80.8        | 90.0         | -9.1         | 35.4        | 55.0        | -19.5         | 45.4        | 35.0        | 10.4         | 19.2        | 10.0        | 9.1          |
|                            | [77.0,84.2] | [81.5,94.8]  | [-16.6,-1.6] | [31.0,40.2] | [45.6,64.0] | [-28.9,-10.2] | [40.9,50.0] | [26.1,45.1] | [1.3,19.5]   | [15.8,23.0] | [5.2,18.5]  | [1.6,16.6]   |
| Lesotho                    | 91.5        | 81.1         | 10.4         | 43.1        | 47.8        | -4.7          | 48.3        | 33.2        | 15.1         | 8.5         | 18.9        | -10.4        |
|                            | [85.3,95.2] | [61.9,91.9]  | [-5.3,26.1]  | [34.7,52.0] | [30.8,65.4] | [-25.8,16.4]  | [39.4,57.4] | [21.4,47.7] | [-4.7,34.9]  | [4.8,14.7]  | [8.1,38.1]  | [-26.1,5.3]  |
| Madagascar                 | 68.8        | 84.6         | -15.8        | 30.3        | 48.8        | -18.5         | 38.5        | 35.8        | 2.7          | 31.2        | 15.4        | 15.8         |
|                            | [62.0,74.9] | [73.9,91.4]  | [-25.8,-5.8] | [24.6,36.7] | [38.6,59.1] | [-30.4,-6.6]  | [33.8,43.4] | [24.3,49.2] | [-9.1,14.5]  | [25.1,38.0] | [8.6,26.1]  | [5.8,25.8]   |
| Malawi                     | 73.4        | 81.8         | -8.4         | 33.1        | 42.1        | -9.1          | 40.3        | 39.7        | 0.7          | 26.6        | 18.2        | 8.4          |
|                            | [68.6,77.7] | [74.1,87.6]  | [-15.1,-1.8] | [28.7,37.7] | [34.2,50.5] | [-16.6,-1.6]  | [35.7,45.1] | [32.9,46.9] | [-6.3,7.6]   | [22.3,31.4] | [12.4,25.9] | [1.8,15.1]   |
| Mozambique                 | 75.9        | 85.3         | -9.4         | 25.6        | 36.0        | -10.4         | 50.3        | 49.3        | 0.9          | 24.1        | 14.7        | 9.4          |
|                            | [70.2,80.8] | [80.6,89.0]  | [-14.8,-4.1] | [20.9,30.9] | [30.4,42.0] | [-17.6,-3.2]  | [44.0,56.5] | [43.2,55.5] | [-6.5,8.4]   | [19.2,29.8] | [11.0,19.4] | [4.1,14.8]   |
| Namibia                    | 86.9        | 85.4         | 1.5          | 34.5        | 37.3        | -2.8          | 52.4        | 48.1        | 4.3          | 13.1        | 14.6        | -1.5         |
|                            | [80.1,91.7] | [65.1,94.8]  | [-11.7,14.7] | [26.0,44.2] | [23.2,54.0] | [-20.7,15.2]  | [43.6,61.1] | [32.2,64.5] | [-17.6,26.1] | [8.3,19.9]  | [5.2,34.9]  | [-14.7,11.7] |
| Rwanda                     | 75.3        | 79.5         | -4.1         | 27.8        | 33.0        | -5.2          | 47.5        | 46.4        | 1.1          | 24.7        | 20.5        | 4.1          |
|                            | [69.0,80.7] | [72.0,85.4]  | [-13.4,5.1]  | [22.4,34.0] | [23.6,44.1] | [-16.7,6.3]   | [41.3,53.8] | [35.7,57.5] | [-10.1,12.3] | [19.3,31.0] | [14.6,28.0] | [-5.1,13.4]  |
| South Africa               | 87.6        | 96.3         | -8.7         | 37.7        | 71.1        | -33.5         | 50.0        | 25.2        | 24.8         | 12.4        | 3.7         | 8.7          |
|                            | [78.4,93.3] | [81.3,99.4]  | [-20.3,3.0]  | [29.6,46.5] | [34.1,92.2] | [-65.6,-1.4]  | [40.6,59.3] | [5.6,65.8]  | [-9.2,58.8]  | [6.7,21.6]  | [0.6,18.7]  | [-3.0,20.3]  |
| South Sudan                | 81.5        | 83.6         | -2.1         | 36.8        | 36.7        | 0.1           | 44.7        | 46.9        | -2.2         | 18.5        | 16.4        | 2.1          |
|                            | [76.5,85.7] | [77.3,88.4]  | [-11.6,7.5]  | [30.2,44.0] | [30.3,43.6] | [-9.6,9.8]    | [37.4,52.3] | [40.8,53.0] | [-12.7,8.3]  | [14.3,23.5] | [11.6,22.7] | [-7.5,11.6]  |
| Sudan                      | 87.2        | 89.0         | -1.9         | 45.4        | 60.3        | -14.8         | 41.7        | 28.7        | 13.0         | 12.8        | 11.0        | 1.9          |
|                            | [83.7,90.0] | [82.4,93.3]  | [-8.2,4.5]   | [38.7,52.4] | [48.9,70.7] | [-25.3,-4.4]  | [35.6,48.1] | [19.7,39.9] | [2.8,23.2]   | [10.0,16.3] | [6.7,17.6]  | [-4.5,8.2]   |
| Swaziland                  | 92.2        | 69.2         | 23.1         | 26.4        | 18.4        | 8.1           | 65.8        | 50.8        | 15.0         | 7.8         | 30.8        | -23.1        |

|                           |             |             |               |             |             |               |             |             |              |             |             |             |
|---------------------------|-------------|-------------|---------------|-------------|-------------|---------------|-------------|-------------|--------------|-------------|-------------|-------------|
|                           | [85.6,96.0] | [39.3,88.6] | [-1.7,47.9]   | [19.0,35.5] | [7.2,39.5]  | [-6.4,22.6]   | [56.5,74.0] | [29.3,72.1] | [-11.0,41.0] | [4.0,14.4]  | [11.4,60.7] | [-47.9,1.7] |
| Tanzania                  | 77.4        | 93.3        | -15.8         | 26.1        | 51.3        | -25.2         | 51.4        | 42.0        | 9.4          | 22.6        | 6.7         | 15.8        |
|                           | [70.0,83.5] | [87.5,96.5] | [-25.0,-6.7]  | [20.5,32.5] | [42.3,60.2] | [-37.5,-13.0] | [42.9,59.8] | [34.3,50.0] | [-1.2,20.0]  | [16.5,30.0] | [3.5,12.5]  | [6.7,25.0]  |
| Uganda                    | 78.4        | 84.5        | -6.1          | 31.5        | 48.9        | -17.4         | 47.0        | 35.6        | 11.4         | 21.6        | 15.5        | 6.1         |
|                           | [74.7,81.7] | [77.1,89.8] | [-13.1,1.0]   | [27.9,35.2] | [39.7,58.2] | [-27.4,-7.5]  | [42.7,51.3] | [29.5,42.2] | [3.3,19.5]   | [18.3,25.3] | [10.2,22.9] | [-1.0,13.1] |
| Zambia                    | 77.0        | 92.4        | -15.4         | 38.8        | 44.6        | -5.8          | 38.2        | 47.8        | -9.6         | 23.0        | 7.6         | 15.4        |
|                           | [71.5,81.8] | [86.1,96.0] | [-21.4,-9.4]  | [32.1,46.0] | [34.6,55.0] | [-18.5,7.0]   | [30.9,46.1] | [38.5,57.3] | [-23.1,3.8]  | [18.2,28.5] | [4.0,13.9]  | [9.4,21.4]  |
| Zimbabwe                  | 82.6        | 85.2        | -2.6          | 38.7        | 51.3        | -12.6         | 43.9        | 33.8        | 10.1         | 17.4        | 14.8        | 2.6         |
|                           | [75.6,87.9] | [77.9,90.3] | [-11.4,6.3]   | [29.2,49.2] | [43.4,59.2] | [-27.8,2.5]   | [36.7,51.3] | [25.7,43.0] | [-5.6,25.8]  | [12.1,24.4] | [9.7,22.1]  | [-6.3,11.4] |
| West & Central Africa     | 67.3        | 81.2        | -13.8         | 24.2        | 41.5        | -17.2         | 43.1        | 39.7        | 3.4          | 32.7        | 18.8        | 13.8        |
|                           | [65.7,68.9] | [79.5,82.7] | [-16.1,-11.5] | [22.9,25.6] | [38.4,44.6] | [-20.5,-14.0] | [41.5,44.8] | [36.5,42.9] | [-0.4,7.2]   | [31.1,34.3] | [17.3,20.5] | [11.5,16.1] |
| Benin                     | 72.9        | 78.1        | -5.2          | 27.8        | 40.2        | -12.5         | 45.1        | 37.8        | 7.3          | 27.1        | 21.9        | 5.2         |
|                           | [68.8,76.6] | [72.5,82.7] | [-13.5,3.2]   | [23.9,32.0] | [32.4,48.6] | [-20.5,-4.4]  | [40.8,49.5] | [30.5,45.8] | [-2.1,16.7]  | [23.4,31.2] | [17.3,27.5] | [-3.2,13.5] |
| Burkina Faso              | 71.7        | 73.0        | -1.3          | 18.9        | 26.3        | -7.4          | 52.8        | 46.6        | 6.1          | 28.3        | 27.0        | 1.3         |
|                           | [68.4,74.7] | [65.4,79.4] | [-8.0,5.4]    | [15.8,22.5] | [20.9,32.6] | [-13.1,-1.7]  | [49.6,55.9] | [41.3,52.1] | [0.7,11.5]   | [25.3,31.6] | [20.6,34.6] | [-5.4,8.0]  |
| Cameroon                  | 67.5        | 88.0        | -20.5         | 27.0        | 50.0        | -23.0         | 40.5        | 38.0        | 2.5          | 32.5        | 12.0        | 20.5        |
|                           | [61.5,73.0] | [81.7,92.3] | [-28.7,-12.3] | [22.1,32.5] | [37.5,62.4] | [-36.3,-9.7]  | [34.7,46.6] | [27.5,49.8] | [-12.9,17.9] | [27.0,38.5] | [7.7,18.3]  | [12.3,28.7] |
| Chad                      | 75.1        | 71.3        | 3.8           | 22.1        | 26.6        | -4.5          | 53.0        | 44.7        | 8.3          | 24.9        | 28.7        | -3.8        |
|                           | [70.3,79.3] | [67.7,74.7] | [-1.4,8.9]    | [18.7,25.9] | [22.8,30.8] | [-9.9,0.9]    | [47.7,58.2] | [41.2,48.2] | [2.7,13.9]   | [20.7,29.7] | [25.3,32.3] | [-8.9,1.4]  |
| Congo                     | 71.0        | 76.4        | -5.4          | 24.8        | 35.3        | -10.5         | 46.3        | 41.1        | 5.1          | 29.0        | 23.6        | 5.4         |
|                           | [66.8,74.9] | [60.2,87.4] | [-19.7,8.9]   | [20.8,29.2] | [22.5,50.7] | [-26.1,5.1]   | [41.2,51.4] | [26.8,57.2] | [-13.0,23.2] | [25.1,33.2] | [12.6,39.8] | [-8.9,19.7] |
| Congo (DR)                | 72.4        | 82.9        | -10.5         | 22.7        | 28.9        | -6.2          | 49.7        | 54.0        | -4.3         | 27.6        | 17.1        | 10.5        |
|                           | [68.8,75.8] | [77.8,87.1] | [-17.6,-3.4]  | [19.4,26.4] | [21.4,37.8] | [-14.5,2.1]   | [45.9,53.5] | [44.8,63.0] | [-14.4,5.8]  | [24.2,31.2] | [12.9,22.2] | [3.4,17.6]  |
| Cote D'Ivoire             | 82.6        | 82.5        | 0.1           | 32.0        | 50.8        | -18.8         | 50.6        | 31.7        | 18.9         | 17.4        | 17.5        | -0.1        |
|                           | [78.1,86.4] | [71.7,89.8] | [-8.7,8.9]    | [27.7,36.7] | [38.3,63.2] | [-31.5,-6.0]  | [45.4,55.8] | [23.0,41.9] | [6.6,31.2]   | [13.6,21.9] | [10.2,28.3] | [-8.9,8.7]  |
| Gabon                     | 68.7        | 94.3        | -25.6         | 27.7        | 38.8        | -11.1         | 41.0        | 55.5        | -14.5        | 31.3        | 5.7         | 25.6        |
|                           | [62.1,74.6] | [84.5,98.0] | [-35.8,-15.4] | [22.2,34.1] | [19.2,62.8] | [-32.8,10.6]  | [35.6,46.6] | [33.4,75.6] | [-34.9,5.8]  | [25.4,37.9] | [2.0,15.5]  | [15.4,35.8] |
| Gambia                    | 75.7        | 88.1        | -12.3         | 45.7        | 56.2        | -10.4         | 30.0        | 31.9        | -1.9         | 24.3        | 11.9        | 12.3        |
|                           | [69.4,81.1] | [74.0,95.0] | [-22.2,-2.5]  | [40.3,51.3] | [39.5,71.6] | [-27.0,6.2]   | [25.0,35.6] | [18.7,48.8] | [-18.9,15.1] | [18.9,30.6] | [5.0,26.0]  | [2.5,22.2]  |
| Ghana                     | 73.5        | 91.1        | -17.6         | 35.2        | 63.6        | -28.4         | 38.3        | 27.5        | 10.8         | 26.5        | 8.9         | 17.6        |
|                           | [67.3,78.8] | [77.7,96.8] | [-27.2,-8.0]  | [28.9,42.1] | [50.7,74.8] | [-42.1,-14.7] | [31.6,45.4] | [17.8,40.0] | [-0.9,22.5]  | [21.2,32.7] | [3.2,22.3]  | [8.0,27.2]  |
| Guinea                    | 71.5        | 85.7        | -14.2         | 27.3        | 50.1        | -22.8         | 44.2        | 35.6        | 8.6          | 28.5        | 14.3        | 14.2        |
|                           | [66.9,75.8] | [75.6,92.1] | [-22.0,-6.4]  | [22.5,32.8] | [37.2,63.1] | [-36.9,-8.8]  | [39.4,49.2] | [26.8,45.5] | [-3.9,21.1]  | [24.2,33.1] | [7.9,24.4]  | [6.4,22.0]  |
| Liberia                   | 79.1        | 78.6        | 0.4           | 29.3        | 32.6        | -3.4          | 49.8        | 46.0        | 3.8          | 20.9        | 21.4        | -0.4        |
|                           | [73.7,83.6] | [68.6,86.1] | [-9.0,9.9]    | [25.2,33.7] | [24.8,41.6] | [-11.8,5.0]   | [44.9,54.7] | [35.3,57.1] | [-5.5,13.1]  | [16.4,26.3] | [13.9,31.4] | [-9.9,9.0]  |
| Mali                      | 68.9        | 74.7        | -5.7          | 29.3        | 41.7        | -12.4         | 39.7        | 33.0        | 6.7          | 31.1        | 25.3        | 5.7         |
|                           | [64.4,73.1] | [67.2,80.9] | [-13.2,1.8]   | [23.9,35.3] | [33.1,50.8] | [-20.2,-4.5]  | [35.6,43.9] | [25.1,42.0] | [-2.2,15.6]  | [26.9,35.6] | [19.1,32.8] | [-1.8,13.2] |
| Mauritania                | 78.5        | 87.8        | -9.3          | 50.0        | 52.1        | -2.1          | 28.5        | 35.7        | -7.3         | 21.5        | 12.2        | 9.3         |
|                           | [72.5,83.5] | [76.1,94.2] | [-20.0,1.4]   | [44.0,56.1] | [42.6,61.5] | [-16.9,12.7]  | [22.9,34.9] | [25.2,47.9] | [-22.0,7.5]  | [16.5,27.5] | [5.8,23.9]  | [-1.4,20.0] |
| Niger                     | 62.7        | 64.6        | -1.9          | 24.2        | 24.2        | -0.0          | 38.5        | 40.4        | -1.9         | 37.3        | 35.4        | 1.9         |
|                           | [58.6,66.6] | [59.7,69.3] | [-8.0,4.1]    | [20.6,28.3] | [19.8,29.3] | [-4.5,4.5]    | [33.5,43.7] | [36.1,44.9] | [-7.9,4.0]   | [33.4,41.4] | [30.7,40.3] | [-4.1,8.0]  |
| Nigeria                   | 62.9        | 85.5        | -22.6         | 22.5        | 51.9        | -29.4         | 40.4        | 33.6        | 6.8          | 37.1        | 14.5        | 22.6        |
|                           | [60.2,65.6] | [81.6,88.7] | [-27.2,-17.9] | [20.5,24.6] | [46.4,57.4] | [-35.3,-23.5] | [37.7,43.2] | [28.7,38.9] | [1.2,12.5]   | [34.4,39.8] | [11.3,18.4] | [17.9,27.2] |
| Sao Tome & Principe       | 68.4        | 97.3        | -28.8         | 25.8        | 60.3        | -34.5         | 42.6        | 37.0        | 5.6          | 31.6        | 2.7         | 28.8        |
|                           | [52.2,81.2] | [75.0,99.8] | [-43.6,-14.1] | [15.3,40.2] | [21.2,89.6] | [-78.1,9.2]   | [32.1,53.8] | [9.3,77.1]  | [-40.4,51.6] | [18.8,47.8] | [0.2,25.0]  | [14.1,43.6] |
| Senegal                   | 77.6        | 96.0        | -18.4         | 37.9        | 73.9        | -36.0         | 39.7        | 33.6        | 17.6         | 22.4        | 4.0         | 18.4        |
|                           | [71.2,82.9] | [82.8,99.2] | [-26.3,-10.5] | [31.2,45.1] | [54.3,87.1] | [-57.5,-14.5] | [32.9,46.9] | [9.7,42.8]  | [-2.1,37.3]  | [17.1,28.8] | [0.8,17.2]  | [10.5,26.3] |
| Sierra Leone              | 74.7        | 83.6        | -8.9          | 20.5        | 37.2        | -16.7         | 54.2        | 46.4        | 7.8          | 25.3        | 16.4        | 8.9         |
|                           | [69.8,79.0] | [78.6,87.6] | [-16.4,-1.4]  | [17.0,24.5] | [30.6,44.5] | [-26.1,-7.3]  | [49.5,58.8] | [38.5,54.4] | [-3.9,19.5]  | [21.0,30.2] | [12.4,21.4] | [1.4,16.4]  |
| Togo                      | 65.8        | 77.4        | -11.6         | 24.9        | 61.0        | -36.2         | 40.9        | 16.4        | 24.5         | 34.2        | 22.6        | 11.6        |
|                           | [55.8,74.5] | [62.5,87.5] | [-30.2,6.9]   | [17.5,34.0] | [46.2,74.1] | [-52.4,-20.0] | [32.4,49.9] | [8.5,29.1]  | [12.9,36.2]  | [25.5,44.2] | [12.5,37.5] | [-6.9,30.2] |
| Latin America & Caribbean | 87.1        | 92.2        | -5.1          | 42.0        | 60.6        | -18.6         | 45.1        | 31.6        | 13.5         | 12.9        | 7.8         | 5.1         |

|                               |             |             |              |             |             |               |             |             |              |             |             |              |
|-------------------------------|-------------|-------------|--------------|-------------|-------------|---------------|-------------|-------------|--------------|-------------|-------------|--------------|
|                               | [85.2,88.7] | [87.8,95.1] | [-10.0,-0.2] | [38.7,45.5] | [52.3,68.3] | [-29.0,-8.1]  | [42.1,48.1] | [23.8,40.6] | [2.9,24.0]   | [11.3,14.8] | [4.9,12.2]  | [0.2,10.0]   |
| Colombia                      | 91.6        | 88.4        | 3.2          | 44.5        | 69.1        | -24.6         | 47.0        | 19.3        | 27.8         | 8.4         | 11.6        | -3.2         |
|                               | [86.0,95.0] | [51.3,98.2] | [-11.9,18.2] | [33.4,56.3] | [40.9,87.9] | [-52.2,3.0]   | [37.4,56.9] | [5.8,48.0]  | [1.0,54.5]   | [5.0,14.0]  | [1.8,48.7]  | [-18.2,11.9] |
| Dominican Republic            | 89.6        | 98.9        | -9.3         | 60.1        | 88.0        | -27.9         | 29.5        | 10.9        | 18.6         | 10.4        | 1.1         | 9.3          |
|                               | [83.8,93.5] | [92.6,99.8] | [-14.2,-4.4] | [51.9,67.8] | [77.8,93.9] | [-39.5,-16.3] | [23.3,36.6] | [5.4,20.8]  | [8.6,28.7]   | [6.5,16.2]  | [0.2,7.4]   | [4.4,14.2]   |
| El Salvador                   | 84.7        | 97.4        | -12.7        | 39.3        | 72.7        | -33.4         | 45.4        | 24.7        | 20.6         | 15.3        | 2.6         | 12.7         |
|                               | [71.8,92.3] | [71.2,99.8] | [-25.8,0.4]  | [27.5,52.5] | [41.9,90.8] | [-56.9,-9.8]  | [33.3,58.1] | [7.5,57.0]  | [-2.4,43.7]  | [7.7,28.2]  | [0.2,28.8]  | [-0.4,25.8]  |
| Guatemala                     | 88.5        | 89.9        | -1.4         | 43.0        | 63.9        | -20.9         | 45.5        | 26.0        | 19.5         | 11.5        | 10.1        | 1.4          |
|                               | [83.8,92.0] | [75.5,96.2] | [-11.5,8.8]  | [37.4,48.7] | [51.1,74.9] | [-35.0,-6.9]  | [39.3,52.0] | [17.3,37.1] | [5.8,33.3]   | [8.0,16.2]  | [3.8,24.5]  | [-8.8,11.5]  |
| Guyana                        | 91.4        | 87.2        | 4.3          | 46.0        | 78.9        | -32.9         | 45.5        | 8.3         | 37.2         | 8.6         | 12.8        | -4.3         |
|                               | [81.1,96.4] | [59.0,97.0] | [-12.9,21.4] | [30.4,62.4] | [55.9,91.7] | [-54.8,-11.0] | [30.8,60.9] | [2.4,24.8]  | [20.5,53.9]  | [3.6,18.9]  | [3.0,41.0]  | [-21.4,12.9] |
| Haiti                         | 80.9        | 86.9        | -6.1         | 29.6        | 53.5        | -23.9         | 51.3        | 33.4        | 17.8         | 19.1        | 13.1        | 6.1          |
|                               | [74.9,85.7] | [72.5,94.4] | [-15.0,2.9]  | [23.4,36.6] | [37.9,68.4] | [-40.4,-7.3]  | [45.5,57.0] | [19.8,50.6] | [1.1,34.5]   | [14.3,25.1] | [5.6,27.5]  | [-2.9,15.0]  |
| Honduras                      | 84.6        | 96.2        | -11.6        | 48.8        | 61.9        | -13.0         | 35.7        | 34.4        | 1.4          | 15.4        | 3.8         | 11.6         |
|                               | [77.8,89.6] | [78.6,99.4] | [-20.0,-3.3] | [40.9,56.9] | [44.3,76.8] | [-28.8,2.7]   | [29.5,42.5] | [21.6,49.9] | [-14.6,17.4] | [10.4,22.2] | [0.6,21.4]  | [3.3,20.0]   |
| Paraguay                      | 95.8        | NA          | NA           | 41.3        | 82.6        | -41.3         | 54.6        | 17.4        | 37.1         | 4.2         | NA          | NA           |
|                               | [86.9,98.8] |             |              | [25.3,59.3] | [24.9,98.5] | [-87.6,5.0]   | [38.4,69.8] | [1.5,75.1]  | [-9.1,83.4]  | [1.2,13.1]  |             |              |
| Peru                          | 86.8        | 97.9        | -11.1        | 45.1        | 39.7        | 5.4           | 41.7        | 58.2        | -16.5        | 13.2        | 2.1         | 11.1         |
|                               | [82.0,90.4] | [77.7,99.8] | [-19.0,-3.2] | [37.8,52.7] | [15.2,70.8] | [-26.1,37.0]  | [34.4,49.4] | [26.3,84.4] | [-48.1,15.0] | [9.6,18.0]  | [0.2,22.3]  | [3.2,19.0]   |
| Suriname                      | 86.4        | NA          | NA           | 65.7        | 61.9        | 3.8           | 20.6        | 38.1        | -17.4        | 13.6        | NA          | NA           |
|                               | [74.2,93.3] |             |              | [45.7,81.3] | [23.8,89.5] | [-43.8,51.3]  | [9.2,39.9]  | [10.5,76.2] | [-61.4,26.6] | [6.7,25.8]  |             |              |
| Low-Income Countries          | 76.0        | 82.6        | -6.6         | 30.5        | 40.9        | -10.4         | 45.5        | 41.7        | 3.8          | 24.0        | 17.4        | 6.6          |
|                               | [74.8,77.2] | [80.4,84.6] | [-8.6,-4.5]  | [28.8,32.2] | [37.8,44.0] | [-14.0,-6.8]  | [43.8,47.3] | [38.7,44.8] | [0.5,7.1]    | [22.8,25.2] | [15.4,19.6] | [4.5,8.6]    |
| Lower-Middle-Income Countries | 79.9        | 90.1        | -10.2        | 42.9        | 59.7        | -16.9         | 37.0        | 30.3        | 6.7          | 20.1        | 9.9         | 10.2         |
|                               | [78.7,81.0] | [88.9,91.1] | [-12.1,-8.3] | [41.5,44.2] | [57.9,61.6] | [-19.7,-14.0] | [35.8,38.3] | [28.5,32.2] | [4.3,9.1]    | [19.0,21.3] | [8.9,11.1]  | [8.3,12.1]   |
| Upper-Middle-Income Countries | 87.4        | 91.6        | -4.2         | 43.0        | 55.6        | -12.5         | 44.4        | 36.0        | 8.4          | 12.6        | 8.4         | 4.2          |
|                               | [84.3,90.0] | [86.9,94.7] | [-8.8,0.4]   | [39.2,46.9] | [47.9,62.9] | [-21.8,-3.2]  | [40.2,48.6] | [29.6,43.1] | [-1.4,18.1]  | [10.0,15.7] | [5.3,13.1]  | [-0.4,8.8]   |

Notes: 95% confidence intervals are shown in brackets. 'Worst' refers to children in the 20% of households with the worst living standards and 'Best' refers to children in the 20% of households with the best living standards, within each country.



**eTable 9. Mortality (Deaths per 1000) at Different Ages by Sex**

|                           | 0–59 months |             |             | 0–23 months |             |             | Neonates    |             |             | 1–23 months |             |             | 24–59 months |             |             |
|---------------------------|-------------|-------------|-------------|-------------|-------------|-------------|-------------|-------------|-------------|-------------|-------------|-------------|--------------|-------------|-------------|
|                           | Female      | Male        | Difference  | Female      | Male        | Difference  | Female      | Male        | Difference  | Female      | Male        | Difference  | Female       | Male        | Difference  |
| Pooled                    | 62.2        | 69.9        | 7.7         | 49.9        | 57.7        | 7.8         | 24.4        | 32.3        | 8.0         | 25.5        | 25.4        | -0.2        | 12.3         | 12.2        | -0.1        |
|                           | [60.9,63.4] | [68.6,71.1] | [6.2,9.2]   | [48.9,50.9] | [56.7,58.7] | [6.5,9.1]   | [23.8,24.9] | [31.7,33.0] | [7.1,8.8]   | [24.8,26.3] | [24.8,26.0] | [-0.9,0.6]  | [11.7,12.9]  | [11.7,12.7] | [-0.6,0.4]  |
| Least Developed Countries | 75.1        | 87.1        | 12.0        | 58.4        | 69.7        | 11.3        | 24.6        | 34.0        | 9.4         | 33.8        | 35.7        | 1.9         | 16.7         | 17.4        | 0.7         |
|                           | [73.3,76.8] | [85.7,88.5] | [10.4,13.6] | [57.0,59.7] | [68.3,71.0] | [9.7,12.9]  | [23.6,25.6] | [32.9,35.2] | [8.1,10.7]  | [32.6,35.0] | [34.7,36.7] | [0.7,3.1]   | [16.0,17.4]  | [16.6,18.2] | [-0.3,1.7]  |
| East Asia & Pacific       | 34.8        | 40.5        | 5.7         | 30.7        | 35.1        | 4.4         | 16.5        | 19.9        | 3.4         | 14.2        | 15.2        | 1.0         | 4.1          | 5.4         | 1.3         |
|                           | [32.8,36.9] | [37.8,43.4] | [2.5,8.9]   | [28.7,32.8] | [32.6,37.9] | [1.5,7.3]   | [14.8,18.5] | [18.2,21.9] | [1.1,5.7]   | [13.1,15.3] | [13.7,16.9] | [-1.0,3.0]  | [3.4,4.9]    | [4.6,6.2]   | [0.1,2.4]   |
| Cambodia                  | 41.5        | 53.8        | 12.3        | 35.4        | 48.1        | 12.7        | 20.1        | 22.1        | 2.0         | 15.3        | 26.0        | 10.7        | 6.1          | 5.7         | -0.4        |
|                           | [34.9,49.3] | [47.0,61.4] | [4.2,20.4]  | [29.0,43.0] | [42.0,55.0] | [5.4,20.0]  | [16.3,24.6] | [18.2,26.8] | [-3.7,7.7]  | [11.7,20.0] | [21.7,31.1] | [5.8,15.5]  | [4.5,8.2]    | [3.9,8.3]   | [-3.2,2.4]  |
| Indonesia                 | 31.3        | 36.7        | 5.4         | 27.8        | 31.7        | 3.9         | 15.3        | 19.2        | 3.9         | 12.5        | 12.5        | 0.0         | 3.4          | 4.9         | 1.5         |
|                           | [27.7,35.2] | [33.5,40.1] | [0.9,9.9]   | [24.4,31.6] | [28.9,34.8] | [-0.4,8.3]  | [12.9,18.2] | [17.3,21.4] | [0.7,7.0]   | [10.4,14.9] | [10.6,14.7] | [-2.8,2.8]  | [2.5,4.8]    | [3.6,6.8]   | [-0.3,3.2]  |
| Lao                       | 45.4        | 53.0        | 7.6         | 40.9        | 48.9        | 8.0         | 19.4        | 21.2        | 1.9         | 21.5        | 27.7        | 6.2         | 4.5          | 4.1         | -0.4        |
|                           | [40.9,50.3] | [48.0,58.5] | [1.9,13.3]  | [36.3,46.0] | [43.9,54.5] | [2.4,13.7]  | [16.6,22.6] | [18.1,24.9] | [-2.6,6.3]  | [18.1,25.5] | [23.9,32.1] | [1.5,10.9]  | [3.4,5.9]    | [3.1,5.4]   | [-2.1,1.2]  |
| Mongolia                  | 15.6        | 20.7        | 5.2         | 13.6        | 16.7        | 3.1         | 6.3         | 9.6         | 3.2         | 7.3         | 7.1         | -0.2        | 1.9          | 4.0         | 2.1         |
|                           | [11.8,20.5] | [16.5,26.1] | [-1.0,11.4] | [10.2,18.1] | [12.6,22.1] | [-2.8,8.9]  | [4.1,9.7]   | [6.7,13.7]  | [-1.2,7.7]  | [4.9,10.8]  | [4.5,11.3]  | [-5.0,4.6]  | [0.8,4.4]    | [2.2,7.3]   | [-0.7,4.9]  |
| Myanmar                   | 65.6        | 77.9        | 12.3        | 59.1        | 67.1        | 8.0         | 29.3        | 34.4        | 5.1         | 29.8        | 32.7        | 3.0         | 6.5          | 10.7        | 4.3         |
|                           | [57.1,75.1] | [67.8,89.2] | [1.4,23.1]  | [51.4,67.9] | [58.1,77.5] | [-2.6,18.6] | [24.0,35.8] | [28.5,41.5] | [-3.4,13.6] | [24.0,37.0] | [26.0,41.2] | [-5.2,11.1] | [4.3,9.6]    | [7.7,14.9]  | [-0.1,8.6]  |
| Papua New Guinea          | 50.3        | 53.3        | 3.0         | 42.0        | 41.8        | -0.2        | 21.4        | 25.8        | 4.5         | 20.6        | 16.0        | -4.6        | 8.3          | 11.5        | 3.1         |
|                           | [43.5,58.2] | [46.3,61.3] | [-5.7,11.6] | [36.1,48.7] | [35.5,49.2] | [-7.4,7.1]  | [17.1,26.6] | [21.6,30.9] | [-0.5,9.5]  | [16.8,25.2] | [11.3,22.5] | [-12.4,3.2] | [6.0,11.6]   | [8.8,15.0]  | [-1.0,7.3]  |
| Philippines               | 26.3        | 29.4        | 3.1         | 22.6        | 26.0        | 3.4         | 12.7        | 14.8        | 2.0         | 9.9         | 11.2        | 1.3         | 3.7          | 3.5         | -0.3        |
|                           | [22.3,31.0] | [24.9,34.7] | [-3.0,9.3]  | [18.6,27.5] | [21.7,31.0] | [-2.7,9.4]  | [10.2,15.9] | [11.6,18.8] | [-2.4,6.5]  | [7.2,13.5]  | [8.9,14.1]  | [-2.3,4.9]  | [2.6,5.3]    | [2.4,5.0]   | [-2.3,1.8]  |
| Timor-Leste               | 35.7        | 45.1        | 9.4         | 28.8        | 36.0        | 7.2         | 12.7        | 20.8        | 8.1         | 16.1        | 15.3        | -0.8        | 6.9          | 9.1         | 2.2         |
|                           | [31.0,41.2] | [39.1,52.1] | [1.1,17.8]  | [25.1,33.1] | [30.7,42.2] | [-0.1,14.6] | [9.7,16.6]  | [16.6,25.9] | [2.5,13.7]  | [13.4,19.4] | [11.8,19.8] | [-6.3,4.6]  | [4.9,9.6]    | [6.5,12.8]  | [-1.6,6.0]  |
| Tonga                     | 10.1        | 12.3        | 2.2         | 10.1        | 10.8        | 0.7         | 5.2         | 5.0         | -0.2        | 4.8         | 5.8         | 1.0         | NA           | 1.5         | NA          |
|                           | [6.0,16.8]  | [7.1,21.2]  | [-6.6,11.0] | [6.0,16.8]  | [5.9,19.7]  | [-7.6,9.1]  | [2.7,10.3]  | [2.3,10.7]  | [-6.5,6.0]  | [1.7,13.7]  | [2.2,15.1]  | [-7.2,9.1]  |              | [0.4,5.3]   |             |
| South Asia                | 51.8        | 57.6        | 5.8         | 45.4        | 52.3        | 6.9         | 26.9        | 36.1        | 9.2         | 18.6        | 16.2        | -2.4        | 6.4          | 5.3         | -1.1        |
|                           | [50.0,53.7] | [55.8,59.4] | [3.9,7.7]   | [43.8,47.2] | [50.6,54.0] | [5.1,8.6]   | [25.8,28.0] | [35.0,37.2] | [7.8,10.7]  | [17.5,19.7] | [15.2,17.3] | [-3.4,-1.3] | [6.0,6.8]    | [5.0,5.6]   | [-1.6,-0.5] |
| Afghanistan               | 58.0        | 65.8        | 7.9         | 52.0        | 58.7        | 6.7         | 21.0        | 28.4        | 7.4         | 31.0        | 30.3        | -0.7        | 5.9          | 7.1         | 1.2         |
|                           | [52.6,63.8] | [58.9,73.4] | [0.6,15.1]  | [47.4,57.1] | [51.5,66.9] | [-1.8,15.2] | [18.5,24.0] | [25.2,32.1] | [3.5,11.4]  | [27.0,35.6] | [25.6,35.8] | [-6.9,5.5]  | [4.3,8.3]    | [5.5,9.1]   | [-2.0,4.3]  |
| Bangladesh                | 36.6        | 44.3        | 7.7         | 32.3        | 39.7        | 7.4         | 22.1        | 29.5        | 7.5         | 10.2        | 10.1        | -0.0        | 4.3          | 4.6         | 0.3         |
|                           | [34.0,39.3] | [41.4,47.3] | [3.6,11.8]  | [29.8,34.9] | [37.0,42.6] | [3.6,11.2]  | [20.2,24.1] | [27.3,32.0] | [4.6,10.3]  | [8.6,12.0]  | [8.6,11.8]  | [-2.1,2.0]  | [3.4,5.5]    | [3.7,5.7]   | [-1.3,1.8]  |
| India                     | 50.4        | 53.8        | 3.4         | 44.0        | 48.5        | 4.5         | 26.6        | 34.0        | 7.4         | 17.4        | 14.5        | -2.9        | 6.4          | 5.3         | -1.1        |
|                           | [49.4,51.4] | [52.4,55.2] | [2.0,4.8]   | [43.2,44.9] | [47.2,49.9] | [3.0,6.0]   | [26.0,27.3] | [32.9,35.2] | [6.2,8.5]   | [16.7,18.0] | [13.8,15.3] | [-3.7,-2.0] | [6.0,6.8]    | [4.9,5.7]   | [-1.7,-0.5] |
| Maldives                  | 17.8        | 25.1        | 7.2         | 17.0        | 21.6        | 4.6         | 10.2        | 14.9        | 4.7         | 6.8         | 6.7         | -0.1        | 0.9          | 3.5         | 2.7         |
|                           | [13.5,23.6] | [18.9,33.2] | [-1.0,15.4] | [12.6,22.8] | [15.6,29.8] | [-3.6,12.8] | [6.8,15.1]  | [9.7,22.8]  | [-3.6,13.0] | [3.8,12.1]  | [3.4,13.1]  | [-3.8,3.6]  | [0.3,2.5]    | [1.7,7.2]   | [0.0,5.3]   |
| Nepal                     | 30.9        | 34.6        | 3.7         | 26.2        | 32.1        | 5.9         | 11.6        | 23.1        | 11.5        | 14.6        | 8.9         | -5.6        | 4.7          | 2.6         | -2.1        |
|                           | [26.5,36.0] | [29.4,40.7] | [-2.3,9.8]  | [21.7,31.5] | [27.0,38.0] | [-0.3,12.0] | [8.6,15.6]  | [19.2,27.8] | [6.4,16.6]  | [11.4,18.6] | [6.6,12.0]  | [-9.8,-1.5] | [2.6,8.5]    | [1.5,4.3]   | [-5.1,0.8]  |
| Pakistan                  | 66.2        | 82.0        | 15.9        | 58.5        | 76.3        | 17.8        | 32.8        | 51.7        | 18.8        | 25.6        | 24.6        | -1.0        | 7.7          | 5.7         | -2.0        |
|                           | [58.1,75.3] | [73.5,91.5] | [4.8,27.0]  | [51.4,66.4] | [68.1,85.4] | [7.7,27.9]  | [27.8,38.7] | [46.6,57.3] | [11.6,26.0] | [21.4,30.6] | [19.6,31.0] | [-7.2,5.2]  | [5.8,10.2]   | [4.4,7.5]   | [-4.6,0.6]  |
| Europe & Central Asia     | 22.6        | 22.8        | 0.2         | 20.9        | 20.6        | -0.3        | 10.5        | 11.6        | 1.1         | 10.3        | 9.0         | -1.3        | 1.7          | 2.2         | 0.5         |
|                           | [18.5,27.6] | [19.7,26.3] | [-5.8,6.3]  | [16.9,25.9] | [17.7,24.0] | [-6.3,5.8]  | [8.0,13.9]  | [10.0,13.5] | [-2.4,4.6]  | [7.6,14.0]  | [6.9,11.7]  | [-5.4,2.8]  | [1.1,2.7]    | [1.4,3.4]   | [-0.6,1.6]  |
| Albania                   | 3.7         | 7.8         | 4.0         | 3.5         | 7.8         | 4.3         | 2.0         | 4.7         | 2.6         | 1.5         | 3.1         | 1.6         | 0.3          | NA          | NA          |
|                           | [1.7,8.0]   | [4.1,14.6]  | [-1.1,9.1]  | [1.5,8.0]   | [4.1,14.6]  | [-0.8,9.3]  | [0.6,6.8]   | [2.5,8.6]   | [-1.6,6.9]  | [0.4,5.1]   | [1.0,9.2]   | [-1.3,4.5]  | [0.0,1.5]    |             |             |
| Armenia                   | 11.3        | 9.8         | -1.5        | 11.1        | 8.3         | -2.9        | 6.0         | 4.7         | -1.2        | 5.2         | 3.5         | -1.6        | 0.2          | 1.5         | 1.4         |
|                           | [7.2,17.7]  | [6.3,15.3]  | [-8.3,5.3]  | [7.1,17.5]  | [4.9,13.8]  | [-9.7,4.0]  | [3.4,10.4]  | [2.4,9.5]   | [-6.0,3.6]  | [2.4,11.0]  | [1.5,8.3]   | [-7.3,4.0]  | [0.0,0.7]    | [0.6,4.2]   | [-0.4,3.2]  |

|                            |              |               |              |             |              |              |             |             |             |             |             |             |             |             |              |
|----------------------------|--------------|---------------|--------------|-------------|--------------|--------------|-------------|-------------|-------------|-------------|-------------|-------------|-------------|-------------|--------------|
| Kyrgyz Republic            | 19.6         | 24.7          | 5.0          | 18.9        | 22.1         | 3.2          | 12.6        | 15.6        | 3.0         | 6.4         | 6.5         | 0.1         | 0.7         | 2.6         | 1.9          |
|                            | [14.1,27.3]  | [19.4,31.3]   | [-3.7,13.8]  | [13.4,26.8] | [16.9,28.9]  | [-5.5,11.8]  | [8.7,18.1]  | [10.9,22.3] | [-3.9,10.0] | [3.4,12.0]  | [3.8,11.0]  | [-4.3,4.6]  | [0.3,1.7]   | [1.2,5.7]   | [-0.2,4.0]   |
| Moldova                    | 15.4         | 16.1          | 0.7          | 15.1        | 14.6         | -0.5         | 11.5        | 12.2        | 0.7         | 3.6         | 2.4         | -1.2        | 0.3         | 1.4         | 1.2          |
|                            | [10.0,23.6]  | [9.8,26.3]    | [-8.5,9.9]   | [9.8,23.3]  | [8.9,24.0]   | [-10.3,9.3]  | [7.0,18.8]  | [7.6,19.5]  | [-7.4,8.7]  | [1.4,9.1]   | [0.6,9.5]   | [-5.8,3.5]  | [0.1,1.3]   | [0.1,16.1]  | [-1.2,3.5]   |
| Tajikistan                 | 26.9         | 39.6          | 12.7         | 24.4        | 35.9         | 11.6         | 10.9        | 18.7        | 7.7         | 13.4        | 17.3        | 3.8         | 2.5         | 3.6         | 1.1          |
|                            | [22.9,31.5]  | [34.5,45.4]   | [5.3,20.2]   | [21.0,28.3] | [31.3,41.2]  | [4.9,18.2]   | [8.4,14.2]  | [15.3,22.7] | [3.3,12.2]  | [10.9,16.5] | [13.1,22.7] | [-2.0,9.7]  | [1.1,5.5]   | [2.0,6.5]   | [-1.9,4.2]   |
| Turkey                     | 22.7         | 17.6          | -5.1         | 21.1        | 16.0         | -5.1         | 10.1        | 8.5         | -1.6        | 11.0        | 7.5         | -3.5        | 1.6         | 1.6         | 0.0          |
|                            | [16.8,30.6]  | [13.1,23.7]   | [-14.2,4.0]  | [15.2,29.3] | [11.8,21.6]  | [-14.0,3.8]  | [6.4,16.0]  | [6.0,12.1]  | [-7.1,3.8]  | [7.2,16.7]  | [4.6,12.1]  | [-9.9,2.9]  | [0.7,3.7]   | [0.6,4.1]   | [-1.4,1.4]   |
| Turkmenistan               | 26.6         | 44.1          | 17.4         | 23.3        | 38.8         | 15.5         | 14.0        | 24.1        | 10.2        | 9.3         | 14.7        | 5.4         | 3.4         | 5.3         | 1.9          |
|                            | [20.9,33.9]  | [36.7,52.9]   | [7.3,27.6]   | [18.0,30.0] | [32.2,46.6]  | [6.3,24.8]   | [9.8,19.8]  | [19.2,30.2] | [3.0,17.4]  | [6.0,14.5]  | [10.6,20.3] | [-0.8,11.6] | [1.7,6.8]   | [3.3,8.5]   | [-1.6,5.4]   |
| Middle East & North Africa | 30.9         | 33.1          | 2.2          | 28.3        | 30.2         | 1.9          | 14.8        | 18.1        | 3.3         | 13.5        | 12.1        | -1.4        | 2.6         | 3.0         | 0.4          |
|                            | [28.5,33.5]  | [31.0,35.4]   | [-0.2,4.7]   | [26.0,30.8] | [28.2,32.3]  | [-0.6,4.4]   | [13.5,16.2] | [16.6,19.7] | [1.5,5.1]   | [12.2,15.0] | [11.0,13.4] | [-3.3,0.4]  | [2.2,3.1]   | [2.4,3.7]   | [-0.5,1.2]   |
| Egypt                      | 30.1         | 30.4          | 0.3          | 27.9        | 27.5         | -0.4         | 15.0        | 17.5        | 2.5         | 12.9        | 10.0        | -2.9        | 2.2         | 2.9         | 0.7          |
|                            | [27.2,33.3]  | [27.6,33.5]   | [-3.9,4.5]   | [25.1,31.1] | [24.8,30.5]  | [-4.3,3.4]   | [12.7,17.7] | [15.3,20.0] | [-0.2,5.1]  | [11.1,15.0] | [8.6,11.6]  | [-5.7,-0.1] | [1.5,3.1]   | [1.9,4.5]   | [-0.8,2.3]   |
| Iraq                       | 21.9         | 26.8          | 4.9          | 19.8        | 24.3         | 4.5          | 11.6        | 14.1        | 2.5         | 8.2         | 10.2        | 2.0         | 2.1         | 2.5         | 0.4          |
|                            | [18.3,26.2]  | [22.5,31.9]   | [-0.6,10.5]  | [16.4,23.9] | [20.3,29.1]  | [-1.0,10.0]  | [9.3,14.4]  | [11.4,17.4] | [-1.1,6.1]  | [6.4,10.5]  | [8.1,12.8]  | [-1.0,5.0]  | [1.4,3.4]   | [1.8,3.5]   | [-0.6,1.4]   |
| Jordan                     | 13.9         | 19.4          | 5.5          | 12.9        | 17.7         | 4.8          | 6.7         | 11.6        | 4.9         | 6.2         | 6.1         | -0.1        | 0.9         | 1.7         | 0.7          |
|                            | [10.8,17.7]  | [15.5,24.3]   | [0.5,10.6]   | [10.0,16.7] | [14.1,22.3]  | [0.1,9.6]    | [5.0,9.0]   | [8.6,15.7]  | [1.1,8.8]   | [4.1,9.5]   | [4.5,8.3]   | [-2.7,2.5]  | [0.4,2.3]   | [0.9,2.9]   | [-0.5,1.9]   |
| State of Palestine         | 20.3         | 25.3          | 5.0          | 18.5        | 22.8         | 4.4          | 9.8         | 13.1        | 3.3         | 8.7         | 9.7         | 1.0         | 1.8         | 2.5         | 0.6          |
|                            | [17.3,23.8]  | [22.1,28.9]   | [-0.8,10.8]  | [15.6,21.9] | [20.1,25.8]  | [-1.2,10.0]  | [8.1,11.7]  | [10.6,16.2] | [-0.9,7.5]  | [6.6,11.5]  | [7.7,12.3]  | [-2.4,4.4]  | [1.0,3.5]   | [1.4,4.2]   | [-0.8,2.1]   |
| Tunisia                    | 15.0         | 16.6          | 1.6          | 13.9        | 15.2         | 1.3          | 9.7         | 9.2         | -0.5        | 4.2         | 6.0         | 1.8         | 1.1         | 1.4         | 0.3          |
|                            | [10.8,20.8]  | [12.8,21.6]   | [-4.9,8.1]   | [9.9,19.5]  | [11.5,20.1]  | [-4.6,7.3]   | [6.4,14.6]  | [6.7,12.7]  | [-4.6,3.7]  | [2.1,8.2]   | [3.9,9.0]   | [-2.6,6.1]  | [0.3,3.6]   | [0.7,2.9]   | [-1.5,2.1]   |
| Yemen                      | 55.7         | 59.3          | 3.5          | 50.4        | 54.7         | 4.3          | 22.7        | 30.2        | 7.5         | 27.7        | 24.5        | -3.2        | 5.3         | 4.6         | -0.7         |
|                            | [51.1,60.7]  | [54.0,65.1]   | [-2.3,9.3]   | [46.2,55.0] | [49.9,59.9]  | [-1.1,9.6]   | [20.0,25.8] | [26.8,34.0] | [3.2,11.8]  | [24.4,31.5] | [21.1,28.4] | [-8.1,1.7]  | [4.1,6.9]   | [3.3,6.4]   | [-2.2,0.7]   |
| Eastern & Southern Africa  | 66.6         | 80.8          | 14.2         | 53.5        | 67.2         | 13.7         | 23.5        | 34.5        | 11.0        | 30.0        | 32.8        | 2.7         | 13.1        | 13.5        | 0.5          |
|                            | [64.0,69.3]  | [78.2,83.4]   | [10.9,17.5]  | [51.1,56.1] | [65.0,69.5]  | [10.5,17.0]  | [22.0,25.1] | [32.7,36.3] | [8.4,13.5]  | [28.5,31.6] | [31.2,34.5] | [1.1,4.4]   | [12.1,14.1] | [12.4,14.8] | [-0.7,1.6]   |
| Angola                     | 72.5         | 86.8          | 14.3         | 52.9        | 66.7         | 13.8         | 18.8        | 30.0        | 11.3        | 34.1        | 36.6        | 2.5         | 19.7        | 20.2        | 0.5          |
|                            | [65.0,80.9]  | [77.5,97.1]   | [5.0,23.5]   | [47.1,59.3] | [59.0,75.3]  | [6.0,21.6]   | [15.4,22.9] | [25.2,35.8] | [5.0,17.6]  | [30.0,38.8] | [31.4,42.7] | [-2.9,7.9]  | [16.5,23.5] | [16.7,24.3] | [-3.2,4.1]   |
| Burundi                    | 77.9         | 86.0          | 8.1          | 58.1        | 66.3         | 8.2          | 23.2        | 26.7        | 3.5         | 34.9        | 39.6        | 4.7         | 19.9        | 19.7        | -0.2         |
|                            | [72.3,84.0]  | [80.9,91.4]   | [-0.1,16.2]  | [52.8,63.9] | [61.0,72.1]  | [0.3,16.2]   | [20.0,27.0] | [23.1,30.9] | [-1.4,8.4]  | [30.9,39.3] | [36.4,43.1] | [-1.1,10.6] | [17.0,23.1] | [17.4,22.3] | [-3.8,3.5]   |
| Comoros                    | 51.6         | 48.1          | -3.5         | 40.4        | 43.0         | 2.6          | 22.8        | 27.9        | 5.1         | 17.6        | 15.1        | -2.4        | 11.2        | 5.1         | -6.1         |
|                            | [41.4,64.0]  | [38.5,60.0]   | [-17.5,10.6] | [31.2,52.2] | [34.3,53.8]  | [-11.0,16.3] | [16.0,32.4] | [21.6,36.0] | [-5.6,15.8] | [11.9,25.8] | [10.8,21.0] | [-9.7,4.8]  | [7.5,16.5]  | [3.0,8.7]   | [-10.6,-1.6] |
| Ethiopia                   | 67.7         | 94.2          | 26.6         | 54.4        | 81.4         | 27.0         | 26.4        | 48.7        | 22.3        | 28.0        | 32.7        | 4.7         | 13.2        | 12.8        | -0.4         |
|                            | [59.7,76.6]  | [86.4,102.7]  | [18.0,35.2]  | [47.3,62.6] | [74.8,88.6]  | [18.6,35.4]  | [21.4,32.7] | [43.6,54.4] | [15.3,29.3] | [23.2,33.7] | [28.0,38.1] | [-0.8,10.2] | [10.6,16.4] | [9.7,17.0]  | [-4.7,3.9]   |
| Kenya                      | 52.4         | 59.6          | 7.2          | 43.9        | 49.8         | 5.9          | 20.7        | 25.1        | 4.4         | 23.2        | 24.7        | 1.5         | 8.5         | 9.7         | 1.2          |
|                            | [48.0,57.2]  | [55.7,63.7]   | [1.5,12.8]   | [39.6,48.6] | [46.0,53.9]  | [0.2,11.7]   | [18.0,23.8] | [22.1,28.5] | [0.8,8.0]   | [19.9,26.9] | [22.0,27.7] | [-2.4,5.5]  | [7.1,10.3]  | [7.9,12.0]  | [-0.9,3.4]   |
| Lesotho                    | 74.5         | 98.0          | 23.5         | 64.1        | 89.4         | 25.3         | 37.5        | 45.4        | 7.9         | 26.6        | 44.0        | 17.4        | 10.4        | 8.6         | -1.8         |
|                            | [63.4,87.4]  | [83.1,115.3]  | [6.8,40.2]   | [53.8,76.2] | [76.2,104.6] | [9.3,41.3]   | [28.7,48.8] | [35.7,57.5] | [-4.1,19.8] | [19.3,36.5] | [36.0,53.8] | [5.9,29.0]  | [5.9,18.4]  | [4.6,16.1]  | [-9.0,5.3]   |
| Madagascar                 | 54.7         | 65.4          | 10.7         | 40.8        | 49.0         | 8.1          | 19.7        | 23.6        | 4.0         | 21.2        | 25.4        | 4.2         | 13.8        | 16.4        | 2.6          |
|                            | [49.9,59.9]  | [59.5,71.9]   | [3.4,18.1]   | [36.9,45.2] | [44.3,54.1]  | [2.1,14.2]   | [16.9,22.8] | [20.6,27.0] | [-0.3,8.2]  | [18.5,24.2] | [22.0,29.3] | [0.7,7.7]   | [11.5,16.6] | [13.9,19.5] | [-1.0,6.2]   |
| Malawi                     | 64.7         | 84.8          | 20.1         | 48.6        | 65.9         | 17.2         | 20.5        | 32.5        | 12.0        | 28.1        | 33.4        | 5.3         | 16.1        | 19.0        | 2.8          |
|                            | [59.9,69.9]  | [79.7,90.3]   | [13.7,26.5]  | [44.3,53.3] | [61.6,70.3]  | [11.6,22.9]  | [17.6,24.0] | [29.4,35.9] | [8.5,15.5]  | [25.4,31.0] | [30.4,36.6] | [1.1,9.4]   | [14.0,18.6] | [16.1,22.4] | [-0.2,5.9]   |
| Mozambique                 | 102.8        | 113.5         | 10.7         | 81.4        | 89.3         | 7.9          | 27.2        | 36.7        | 9.5         | 54.2        | 52.6        | -1.6        | 21.3        | 24.1        | 2.8          |
|                            | [94.4,111.8] | [106.3,121.1] | [1.2,20.2]   | [74.6,88.8] | [82.8,96.4]  | [-0.4,16.3]  | [23.5,31.5] | [32.1,42.0] | [3.4,15.6]  | [48.4,60.6] | [47.3,58.4] | [-9.7,6.4]  | [17.5,26.0] | [20.4,28.5] | [-2.8,8.4]   |
| Namibia                    | 53.8         | 64.0          | 10.2         | 44.3        | 52.6         | 8.2          | 14.2        | 23.4        | 9.2         | 30.2        | 29.2        | -1.0        | 9.5         | 11.5        | 2.0          |
|                            | [47.7,60.6]  | [55.4,74.0]   | [0.6,19.9]   | [38.3,51.2] | [45.5,60.6]  | [-1.0,17.4]  | [10.8,18.6] | [19.0,28.7] | [3.7,14.6]  | [25.1,36.2] | [23.7,35.9] | [-8.7,6.8]  | [6.8,13.1]  | [8.3,15.8]  | [-3.3,7.3]   |
| Rwanda                     | 64.0         | 70.2          | 6.2          | 49.7        | 53.9         | 4.2          | 19.8        | 24.6        | 4.8         | 29.8        | 29.3        | -0.5        | 14.3        | 16.3        | 1.9          |
|                            | [58.3,70.2]  | [63.9,77.0]   | [-1.5,13.8]  | [44.9,54.9] | [48.7,59.6]  | [-2.2,10.6]  | [17.0,23.2] | [21.5,28.1] | [0.6,8.9]   | [26.4,33.6] | [25.4,33.7] | [-5.5,4.4]  | [11.8,17.4] | [13.8,19.2] | [-1.8,5.7]   |

|                       |               |               |             |              |               |             |             |             |             |             |             |             |             |             |              |
|-----------------------|---------------|---------------|-------------|--------------|---------------|-------------|-------------|-------------|-------------|-------------|-------------|-------------|-------------|-------------|--------------|
| South Africa          | 44.1          | 56.4          | 12.3        | 41.1         | 51.8          | 10.7        | 20.0        | 28.9        | 9.0         | 21.1        | 22.9        | 1.7         | 3.0         | 4.6         | 1.5          |
|                       | [35.0,55.5]   | [46.7,67.9]   | [-1.4,26.0] | [31.9,52.7]  | [42.2,63.4]   | [-2.8,24.2] | [12.6,31.4] | [21.2,39.4] | [-2.7,20.7] | [14.7,30.2] | [17.7,29.4] | [-7.3,10.7] | [1.7,5.4]   | [2.9,7.4]   | [-1.2,4.3]   |
| South Sudan           | 87.5          | 105.2         | 17.7        | 71.5         | 86.1          | 14.7        | 31.3        | 40.2        | 8.9         | 40.2        | 45.9        | 5.7         | 16.0        | 19.1        | 3.1          |
|                       | [79.5,96.2]   | [94.8,116.7]  | [7.6,27.9]  | [64.8,78.8]  | [77.2,96.0]   | [5.6,23.7]  | [26.5,37.0] | [34.5,47.0] | [3.7,14.2]  | [34.0,47.4] | [40.5,51.9] | [-0.5,11.9] | [13.0,19.8] | [15.8,23.2] | [-0.8,6.9]   |
| Sudan                 | 60.7          | 76.7          | 16.0        | 52.8         | 66.4          | 13.6        | 24.8        | 35.8        | 11.0        | 28.0        | 30.6        | 2.6         | 8.0         | 10.3        | 2.4          |
|                       | [56.0,65.9]   | [71.2,82.7]   | [8.3,23.8]  | [48.2,57.7]  | [61.1,72.1]   | [5.5,21.7]  | [21.7,28.3] | [32.5,39.4] | [6.6,15.3]  | [24.4,32.0] | [26.9,34.7] | [-3.4,8.7]  | [6.2,10.2]  | [8.4,12.7]  | [-0.5,5.3]   |
| Swaziland             | 69.4          | 89.3          | 19.9        | 62.4         | 75.4          | 13.0        | 17.6        | 19.3        | 1.7         | 44.8        | 56.1        | 11.3        | 7.0         | 13.8        | 6.8          |
|                       | [57.6,83.5]   | [71.4,111.1]  | [2.0,37.7]  | [51.3,75.7]  | [61.0,93.0]   | [-3.6,29.7] | [12.9,23.9] | [14.2,26.3] | [-5.8,9.3]  | [34.6,57.8] | [42.5,73.7] | [-4.2,26.9] | [4.2,11.8]  | [8.2,23.2]  | [-0.9,14.6]  |
| Tanzania              | 75.9          | 80.1          | 4.2         | 59.6         | 69.6          | 10.0        | 25.2        | 32.7        | 7.5         | 34.4        | 36.9        | 2.4         | 16.3        | 10.5        | -5.8         |
|                       | [68.8,83.6]   | [72.5,88.4]   | [-6.3,14.7] | [53.6,66.3]  | [63.0,76.8]   | [0.8,19.1]  | [21.5,29.6] | [28.6,37.4] | [1.4,13.6]  | [29.9,39.6] | [32.4,41.8] | [-3.4,8.3]  | [13.0,20.3] | [8.2,13.5]  | [-10.2,-1.3] |
| Uganda                | 65.6          | 80.8          | 15.1        | 52.5         | 65.4          | 12.9        | 23.5        | 31.3        | 7.8         | 29.1        | 34.1        | 5.1         | 13.1        | 15.3        | 2.2          |
|                       | [60.7,71.0]   | [75.3,86.5]   | [9.2,21.0]  | [48.1,57.4]  | [61.1,70.1]   | [7.8,18.0]  | [21.1,26.1] | [28.3,34.6] | [4.2,11.5]  | [25.8,32.7] | [31.1,37.5] | [0.8,9.3]   | [11.0,15.6] | [12.8,18.3] | [-1.5,5.9]   |
| Zambia                | 58.8          | 69.7          | 11.0        | 47.4         | 55.3          | 7.9         | 20.0        | 30.0        | 10.0        | 27.4        | 25.4        | -2.1        | 11.4        | 14.4        | 3.1          |
|                       | [52.3,66.0]   | [61.8,78.7]   | [2.6,19.3]  | [42.0,53.6]  | [48.0,63.7]   | [-0.6,16.4] | [16.2,24.7] | [24.3,36.9] | [1.6,18.3]  | [23.2,32.4] | [22.2,28.9] | [-6.8,2.7]  | [8.9,14.5]  | [11.9,17.5] | [-0.8,7.0]   |
| Zimbabwe              | 67.8          | 77.7          | 9.9         | 56.4         | 65.9          | 7.5         | 27.3        | 35.7        | 8.4         | 29.2        | 30.3        | 1.1         | 11.3        | 11.7        | 0.4          |
|                       | [60.1,76.3]   | [68.5,87.9]   | [0.0,19.8]  | [50.4,63.1]  | [58.7,73.9]   | [0.6,18.4]  | [23.4,31.7] | [30.1,42.2] | [2.0,14.8]  | [24.4,34.8] | [25.4,35.9] | [-5.0,7.2]  | [7.9,16.2]  | [8.7,15.8]  | [-4.1,5.0]   |
| West & Central Africa | 110.1         | 121.6         | 11.6        | 76.8         | 86.9          | 10.0        | 29.5        | 37.4        | 7.9         | 47.3        | 49.5        | 2.2         | 33.2        | 34.8        | 1.5          |
|                       | [106.5,113.8] | [118.5,124.8] | [7.9,15.2]  | [74.2,79.5]  | [84.4,89.5]   | [7.3,12.8]  | [28.0,31.1] | [36.1,38.8] | [6.1,9.6]   | [45.4,49.3] | [47.6,51.4] | [0.3,4.1]   | [31.6,35.0] | [33.1,36.5] | [-0.3,3.3]   |
| Benin                 | 93.4          | 110.5         | 17.1        | 66.2         | 81.2          | 15.0        | 25.8        | 39.1        | 13.3        | 40.3        | 42.1        | 1.7         | 27.2        | 29.4        | 2.2          |
|                       | [86.3,101.0]  | [103.3,118.2] | [8.5,25.8]  | [60.5,72.4]  | [75.3,87.4]   | [8.1,21.9]  | [22.9,29.2] | [34.7,44.0] | [8.3,18.2]  | [36.0,45.2] | [37.9,46.7] | [-3.9,7.3]  | [23.8,31.1] | [26.0,33.2] | [-2.3,6.6]   |
| Burkina Faso          | 141.3         | 153.7         | 12.4        | 100.1        | 110.8         | 10.8        | 30.8        | 37.7        | 6.9         | 69.2        | 73.2        | 3.9         | 41.3        | 42.9        | 1.7          |
|                       | [134.4,148.5] | [143.9,164.2] | [3.7,21.1]  | [94.5,105.9] | [103.7,118.4] | [4.0,17.6]  | [27.8,34.2] | [33.8,42.0] | [2.2,11.5]  | [64.8,74.0] | [67.4,79.3] | [-1.8,9.7]  | [38.2,44.5] | [38.5,47.9] | [-3.3,6.7]   |
| Cameroon              | 80.5          | 98.2          | 17.7        | 57.8         | 72.0          | 14.3        | 25.7        | 33.6        | 7.9         | 32.1        | 38.4        | 6.3         | 22.7        | 26.1        | 3.4          |
|                       | [73.6,88.0]   | [88.9,108.3]  | [7.2,28.1]  | [52.4,63.7]  | [65.0,79.7]   | [5.9,22.6]  | [22.2,29.6] | [29.0,38.9] | [2.5,13.4]  | [27.4,37.6] | [33.8,43.7] | [-0.3,12.9] | [19.2,26.9] | [22.0,31.0] | [-2.2,9.0]   |
| Chad                  | 140.1         | 155.0         | 14.9        | 99.8         | 115.1         | 15.3        | 29.5        | 42.6        | 13.1        | 70.3        | 72.6        | 2.2         | 40.3        | 39.9        | -0.4         |
|                       | [127.6,153.6] | [141.7,169.4] | [6.5,23.4]  | [87.3,113.9] | [101.0,130.9] | [7.3,23.3]  | [25.5,34.0] | [38.0,47.7] | [8.5,17.7]  | [60.5,81.7] | [62.1,84.6] | [-4.0,8.5]  | [36.9,44.1] | [36.7,43.5] | [-5.5,4.7]   |
| Congo                 | 77.5          | 85.9          | 8.3         | 59.9         | 59.1          | -0.8        | 21.3        | 27.4        | 6.1         | 38.7        | 31.7        | -6.9        | 17.6        | 26.8        | 9.1          |
|                       | [69.5,86.4]   | [77.5,95.1]   | [-1.1,17.8] | [52.1,68.8]  | [52.2,66.9]   | [-10.4,8.8] | [16.6,27.1] | [22.3,33.6] | [-0.9,13.1] | [31.9,46.7] | [27.3,36.9] | [-15.6,1.7] | [13.8,22.5] | [22.3,32.1] | [2.5,15.8]   |
| Congo (DR)            | 108.3         | 114.9         | 6.5         | 79.8         | 83.9          | 4.1         | 28.1        | 32.2        | 4.1         | 51.7        | 51.7        | 0.0         | 28.6        | 31.0        | 2.4          |
|                       | [100.2,117.1] | [107.9,122.3] | [-1.5,14.5] | [73.1,87.0]  | [78.5,89.6]   | [-3.7,11.9] | [23.8,33.2] | [28.5,36.3] | [-1.6,9.8]  | [46.7,57.1] | [47.1,56.7] | [-6.0,6.0]  | [25.6,31.8] | [26.9,35.6] | [-1.6,6.5]   |
| Cote D'Ivoire         | 91.1          | 110.8         | 19.8        | 71.8         | 86.8          | 15.0        | 30.5        | 40.2        | 9.7         | 41.3        | 46.6        | 5.2         | 19.2        | 24.0        | 4.8          |
|                       | [82.4,100.5]  | [101.7,120.7] | [10.0,29.5] | [64.0,80.5]  | [78.5,95.8]   | [5.9,24.0]  | [25.8,36.0] | [36.3,44.6] | [3.1,16.4]  | [35.6,48.0] | [40.0,54.1] | [-1.1,11.5] | [16.2,22.9] | [19.3,30.0] | [-0.4,10.0]  |
| Gabon                 | 56.3          | 70.5          | 14.2        | 45.7         | 54.9          | 9.2         | 23.7        | 27.0        | 3.3         | 22.0        | 27.9        | 5.9         | 10.7        | 15.6        | 4.9          |
|                       | [46.6,67.9]   | [60.1,82.6]   | [2.9,25.5]  | [36.8,56.6]  | [45.7,65.8]   | [-2.7,21.2] | [16.9,33.1] | [20.6,35.3] | [-5.4,12.0] | [16.8,28.8] | [21.6,36.1] | [-1.4,13.3] | [7.3,15.6]  | [11.5,21.1] | [-2.0,11.9]  |
| Gambia                | 51.2          | 66.8          | 15.7        | 40.8         | 55.2          | 14.4        | 23.0        | 35.3        | 12.3        | 17.8        | 19.9        | 2.1         | 10.4        | 11.6        | 1.2          |
|                       | [45.4,57.6]   | [60.3,74.0]   | [7.7,23.6]  | [35.9,46.3]  | [49.9,61.1]   | [7.6,21.3]  | [19.2,27.5] | [31.5,39.7] | [6.7,18.0]  | [14.9,21.3] | [16.3,24.3] | [-2.7,6.9]  | [7.9,13.6]  | [9.1,14.7]  | [-2.7,5.2]   |
| Ghana                 | 62.2          | 77.6          | 15.5        | 49.9         | 59.9          | 10.1        | 26.8        | 34.7        | 7.9         | 23.0        | 25.2        | 2.1         | 12.3        | 17.7        | 5.4          |
|                       | [55.8,69.2]   | [69.5,86.7]   | [7.2,23.8]  | [44.2,56.2]  | [52.9,67.9]   | [0.7,19.4]  | [21.1,34.1] | [29.4,41.0] | [-0.0,15.9] | [19.5,27.2] | [20.6,30.8] | [-3.6,7.9]  | [9.5,15.8]  | [13.0,24.1] | [0.1,10.7]   |
| Guinea                | 100.6         | 115.9         | 15.3        | 73.5         | 86.6          | 13.1        | 28.5        | 38.0        | 9.5         | 45.0        | 48.6        | 3.6         | 27.1        | 29.3        | 2.2          |
|                       | [90.2,111.9]  | [105.0,127.7] | [4.5,26.1]  | [65.2,82.7]  | [77.5,96.7]   | [3.2,23.1]  | [24.7,32.8] | [32.5,44.4] | [3.4,15.7]  | [38.3,52.8] | [41.6,56.7] | [-4.1,11.3] | [22.9,32.1] | [25.3,33.8] | [-3.6,8.0]   |
| Liberia               | 111.3         | 114.5         | 3.3         | 86.8         | 91.6          | 4.8         | 30.1        | 37.2        | 7.2         | 56.7        | 54.4        | -2.3        | 24.5        | 22.9        | -1.6         |
|                       | [99.3,124.5]  | [102.4,127.9] | [-8.1,14.6] | [78.7,95.6]  | [80.3,104.4]  | [-5.6,15.3] | [24.1,37.4] | [30.7,45.1] | [-0.0,14.3] | [49.8,64.5] | [47.0,62.9] | [-12.5,7.8] | [18.6,32.1] | [20.0,26.1] | [-8.0,4.8]   |
| Mali                  | 105.3         | 120.0         | 14.7        | 70.4         | 82.0          | 11.6        | 30.9        | 37.7        | 6.8         | 39.5        | 44.3        | 4.8         | 34.9        | 38.0        | 3.1          |
|                       | [97.1,114.2]  | [107.7,133.5] | [3.1,26.2]  | [63.3,78.3]  | [73.4,91.6]   | [2.3,20.8]  | [26.0,36.7] | [32.5,43.8] | [1.9,11.7]  | [35.0,44.6] | [38.2,51.3] | [-2.3,11.9] | [30.7,39.6] | [32.8,44.0] | [-3.1,9.3]   |
| Mauritania            | 48.4          | 56.8          | 8.3         | 40.1         | 48.7          | 8.7         | 23.5        | 31.5        | 8.0         | 16.5        | 17.2        | 0.7         | 8.4         | 8.1         | -0.3         |
|                       | [43.3,54.2]   | [50.0,64.4]   | [0.9,15.7]  | [35.1,45.7]  | [42.8,55.5]   | [1.5,15.8]  | [20.0,27.7] | [26.8,37.0] | [2.5,13.4]  | [13.5,20.3] | [14.4,20.6] | [-3.7,5.1]  | [6.7,10.6]  | [5.9,11.1]  | [-3.7,3.0]   |
| Niger                 | 146.0         | 159.8         | 13.7        | 90.3         | 104.4         | 14.1        | 24.7        | 38.1        | 13.4        | 65.6        | 66.3        | 0.7         | 55.8        | 55.4        | -0.3         |
|                       | [138.0,154.5] | [151.3,168.6] | [2.9,24.6]  | [84.6,96.4]  | [97.5,111.7]  | [6.0,22.1]  | [22.1,27.6] | [34.2,42.4] | [9.2,17.6]  | [60.3,71.3] | [60.3,72.8] | [-5.3,6.7]  | [51.0,61.0] | [50.2,61.1] | [-7.4,6.7]   |
| Nigeria               | 123.8         | 133.5         | 9.7         | 82.8         | 92.7          | 9.9         | 32.8        | 40.8        | 8.0         | 50.0        | 52.0        | 1.9         | 41.0        | 40.8        | -0.2         |
|                       | [115.7,132.5] | [126.6,140.8] | [2.6,16.8]  | [76.7,89.4]  | [88.0,97.7]   | [3.7,16.1]  | [28.9,37.2] | [37.7,44.0] | [4.3,11.6]  | [46.5,53.8] | [48.4,55.7] | [-2.3,6.1]  | [37.8,44.5] | [37.0,45.0] | [-3.7,3.3]   |

|                               |               |               |             |             |              |              |             |             |             |             |             |             |             |             |             |
|-------------------------------|---------------|---------------|-------------|-------------|--------------|--------------|-------------|-------------|-------------|-------------|-------------|-------------|-------------|-------------|-------------|
| Sao Tome & Principe           | 35.1          | 50.4          | 15.3        | 31.3        | 39.8         | 8.5          | 12.4        | 23.4        | 11.0        | 18.9        | 16.4        | -2.5        | 3.8         | 10.6        | 6.7         |
|                               | [25.5,48.1]   | [36.7,68.8]   | [-6.4,37.0] | [23.0,42.5] | [28.3,55.9]  | [-10.1,27.2] | [7.9,19.3]  | [15.6,34.9] | [0.5,21.5]  | [12.4,28.8] | [10.5,25.7] | [-14.8,9.9] | [1.4,10.2]  | [6.6,16.8]  | [0.8,12.7]  |
| Senegal                       | 44.0          | 52.8          | 8.8         | 36.2        | 44.9         | 8.7          | 20.8        | 27.0        | 6.2         | 15.3        | 17.9        | 2.6         | 7.8         | 7.9         | 0.1         |
|                               | [37.0,52.3]   | [46.5,60.0]   | [-0.7,18.4] | [30.1,43.4] | [38.6,52.3]  | [-0.8,18.3]  | [16.1,26.9] | [22.9,31.8] | [-0.9,13.3] | [12.5,18.8] | [13.9,23.0] | [-3.3,8.4]  | [5.5,11.1]  | [5.9,10.7]  | [-2.9,3.1]  |
| Sierra Leone                  | 113.1         | 135.1         | 22.0        | 88.1        | 104.1        | 16.0         | 24.0        | 35.1        | 11.2        | 64.2        | 69.0        | 4.8         | 25.0        | 31.0        | 6.0         |
|                               | [105.1,121.7] | [126.9,143.7] | [12.1,31.9] | [81.5,95.2] | [96.6,112.2] | [8.1,23.9]   | [20.2,28.4] | [30.9,39.9] | [5.8,16.5]  | [58.8,69.9] | [63.1,75.4] | [-2.0,11.7] | [21.1,29.6] | [25.7,37.3] | [-1.9,13.9] |
| Togo                          | 67.6          | 81.1          | 13.6        | 47.7        | 54.1         | 6.5          | 25.7        | 30.0        | 4.3         | 21.9        | 24.1        | 2.2         | 19.9        | 27.0        | 7.1         |
|                               | [58.1,78.5]   | [72.2,91.1]   | [-0.2,27.3] | [39.3,57.6] | [47.6,61.6]  | [-4.8,17.8]  | [20.0,33.0] | [25.0,36.0] | [-3.4,12.1] | [16.6,28.9] | [19.0,30.6] | [-7.3,11.6] | [15.2,26.0] | [21.5,33.9] | [-0.1,14.3] |
| Latin America & Caribbean     | 30.0          | 33.9          | 3.9         | 26.5        | 30.5         | 4.0          | 14.1        | 16.7        | 2.6         | 12.4        | 13.8        | 1.3         | 3.5         | 3.4         | -0.1        |
|                               | [27.9,32.3]   | [31.9,36.0]   | [1.8,5.9]   | [24.5,28.7] | [28.8,32.3]  | [2.0,5.9]    | [12.7,15.7] | [15.6,18.0] | [0.9,4.3]   | [11.3,13.7] | [12.5,15.2] | [-0.2,2.9]  | [2.9,4.2]   | [2.9,4.0]   | [-0.7,0.6]  |
| Colombia                      | 18.5          | 19.0          | 0.5         | 17.1        | 17.7         | 0.6          | 9.1         | 10.4        | 1.3         | 8.0         | 7.3         | -0.7        | 1.3         | 1.3         | -0.1        |
|                               | [15.5,22.0]   | [16.0,22.5]   | [-4.0,5.0]  | [14.3,20.5] | [14.8,21.1]  | [-3.7,4.8]   | [7.2,11.7]  | [8.0,13.5]  | [-1.9,4.4]  | [6.0,10.7]  | [5.8,9.1]   | [-3.9,2.5]  | [0.8,2.2]   | [0.7,2.1]   | [-0.9,0.7]  |
| Dominican Republic            | 32.4          | 37.9          | 5.5         | 29.9        | 35.8         | 5.8          | 22.9        | 26.6        | 3.7         | 7.0         | 9.2         | 2.1         | 2.5         | 2.2         | -0.3        |
|                               | [27.5,38.1]   | [32.9,43.6]   | [-1.4,12.5] | [25.4,35.2] | [30.9,41.4]  | [-0.8,12.4]  | [18.6,28.1] | [22.2,31.8] | [-2.9,10.3] | [5.2,9.5]   | [6.7,12.5]  | [-1.3,5.6]  | [1.4,4.4]   | [1.4,3.4]   | [-2.0,1.3]  |
| El Salvador                   | 19.1          | 20.7          | 1.6         | 17.5        | 18.8         | 1.3          | 8.6         | 11.3        | 2.7         | 8.9         | 7.4         | -1.5        | 1.6         | 2.0         | 0.3         |
|                               | [14.9,24.4]   | [15.6,27.4]   | [-7.1,10.4] | [13.5,22.7] | [14.3,24.5]  | [-6.1,8.6]   | [6.0,12.3]  | [8.3,15.5]  | [-2.4,7.9]  | [5.7,13.9]  | [5.0,11.1]  | [-6.2,3.2]  | [0.6,4.4]   | [0.7,5.2]   | [-2.1,2.8]  |
| Guatemala                     | 35.8          | 41.1          | 5.3         | 32.2        | 37.7         | 5.5          | 14.7        | 20.2        | 5.5         | 17.5        | 17.4        | -0.0        | 3.7         | 3.5         | -0.2        |
|                               | [32.2,39.9]   | [36.6,46.2]   | [-0.3,10.9] | [28.6,36.1] | [33.3,42.5]  | [0.3,10.7]   | [12.2,17.7] | [17.3,23.6] | [1.3,9.7]   | [15.0,20.3] | [14.2,21.3] | [-4.1,4.1]  | [2.4,5.6]   | [2.4,5.1]   | [-1.8,1.4]  |
| Guyana                        | 31.4          | 41.3          | 10.0        | 27.3        | 39.1         | 11.8         | 17.2        | 24.9        | 7.7         | 10.0        | 14.2        | 4.1         | 4.1         | 2.2         | -1.9        |
|                               | [23.3,42.1]   | [32.7,52.1]   | [-1.5,21.4] | [19.7,37.6] | [30.8,49.5]  | [1.3,22.4]   | [11.5,25.7] | [18.2,34.1] | [-3.3,18.7] | [6.1,16.6]  | [8.8,22.7]  | [-2.6,10.8] | [1.5,11.2]  | [0.8,6.0]   | [-6.4,2.7]  |
| Haiti                         | 76.8          | 88.8          | 12.0        | 63.4        | 74.4         | 11.1         | 30.3        | 32.8        | 2.4         | 33.0        | 41.7        | 8.6         | 13.4        | 14.3        | 0.9         |
|                               | [68.9,85.5]   | [79.8,98.6]   | [1.0,23.0]  | [55.7,71.9] | [66.5,83.3]  | [2.0,20.2]   | [25.1,36.7] | [26.6,40.3] | [-5.3,10.2] | [28.4,38.3] | [35.5,48.8] | [2.7,14.6]  | [10.6,17.0] | [10.9,18.7] | [-4.5,6.2]  |
| Honduras                      | 29.3          | 29.7          | 0.3         | 25.7        | 27.1         | 1.4          | 17.0        | 16.2        | -0.8        | 8.7         | 10.9        | 2.2         | 3.7         | 2.6         | -1.1        |
|                               | [25.3,34.0]   | [26.2,33.6]   | [-4.3,5.0]  | [21.9,30.0] | [23.7,30.9]  | [-2.9,5.7]   | [13.7,21.0] | [13.5,19.4] | [-4.5,3.0]  | [7.0,10.7]  | [8.4,14.0]  | [-0.4,4.7]  | [2.6,5.2]   | [1.7,3.9]   | [-2.8,0.6]  |
| Paraguay                      | 17.4          | 21.5          | 4.1         | 16.9        | 20.8         | 3.9          | 5.3         | 10.9        | 5.6         | 11.6        | 9.9         | -1.7        | 0.6         | 0.7         | 0.1         |
|                               | [11.9,25.5]   | [17.1,27.1]   | [-3.8,11.9] | [11.4,25.0] | [16.4,26.5]  | [-4.1,12.0]  | [3.6,7.8]   | [7.9,15.1]  | [1.7,9.5]   | [6.8,19.5]  | [6.5,15.0]  | [-8.8,5.4]  | [0.2,1.5]   | [0.2,2.2]   | [-0.6,0.9]  |
| Peru                          | 23.2          | 27.1          | 4.0         | 20.4        | 24.6         | 4.2          | 11.4        | 13.6        | 2.2         | 8.9         | 10.9        | 2.0         | 2.8         | 2.6         | -0.2        |
|                               | [20.0,26.9]   | [23.2,31.8]   | [-1.6,9.5]  | [17.4,23.9] | [20.7,29.1]  | [-1.2,9.6]   | [8.9,14.8]  | [11.2,16.6] | [-1.5,5.9]  | [7.5,10.6]  | [8.0,14.9]  | [-1.7,5.7]  | [1.8,4.6]   | [1.6,4.1]   | [-2.1,1.6]  |
| Suriname                      | 15.5          | 24.1          | 8.6         | 13.9        | 21.7         | 7.8          | 10.1        | 16.0        | 5.9         | 3.9         | 5.7         | 1.8         | 1.5         | 2.4         | 0.9         |
|                               | [10.0,23.8]   | [17.8,32.6]   | [-0.3,17.5] | [8.9,21.7]  | [15.9,29.5]  | [-0.5,16.0]  | [5.7,17.7]  | [11.4,22.3] | [-1.7,13.5] | [2.1,7.2]   | [2.9,11.2]  | [-2.3,6.0]  | [0.4,6.1]   | [1.2,4.8]   | [-1.6,3.3]  |
| Low-Income Countries          | 84.6          | 98.3          | 13.8        | 64.5        | 77.0         | 12.4         | 25.5        | 35.7        | 10.2        | 39.0        | 41.3        | 2.3         | 20.0        | 21.3        | 1.3         |
|                               | [81.9,87.3]   | [96.2,100.5]  | [11.4,16.1] | [62.6,66.6] | [75.0,78.9]  | [10.1,14.7]  | [24.2,26.9] | [34.1,37.3] | [8.4,11.9]  | [37.3,40.8] | [39.8,42.9] | [0.8,3.8]   | [19.0,21.1] | [20.5,22.2] | [0.1,2.6]   |
| Lower-Middle-Income Countries | 61.2          | 67.7          | 6.5         | 49.6        | 56.7         | 7.1          | 25.9        | 34.0        | 8.1         | 23.6        | 22.7        | -0.9        | 11.6        | 11.0        | -0.6        |
|                               | [59.5,62.9]   | [66.2,69.2]   | [4.7,8.3]   | [48.3,50.9] | [55.5,57.9]  | [5.5,8.7]    | [25.1,26.8] | [33.2,34.8] | [6.6,9.5]   | [22.7,24.6] | [22.0,23.5] | [-1.8,-0.0] | [11.1,12.3] | [10.4,11.6] | [-1.3,0.0]  |
| Upper-Middle-Income Countries | 29.2          | 34.0          | 4.8         | 26.3        | 30.2         | 3.9          | 14.0        | 17.7        | 3.7         | 12.3        | 12.5        | 0.2         | 2.8         | 3.7         | 0.9         |
|                               | [27.2,31.2]   | [31.5,36.5]   | [1.3,8.3]   | [24.5,28.3] | [27.8,32.9]  | [0.7,7.1]    | [12.8,15.4] | [15.7,20.0] | [1.2,6.2]   | [11.1,13.6] | [11.2,14.1] | [-1.5,1.9]  | [2.3,3.4]   | [3.2,4.4]   | [0.0,1.8]   |

Notes: 95% confidence intervals are shown in brackets.

**eTable 10.** Shares of Deaths Among Children Younger Than 5 Years Occurring at Different Ages by Sex

|                           | 0–23 months |             |             | Neonates    |             |              | 1–23 months |             |               | 24–59 months |             |             |
|---------------------------|-------------|-------------|-------------|-------------|-------------|--------------|-------------|-------------|---------------|--------------|-------------|-------------|
|                           | Female      | Male        | Difference  | Female      | Male        | Difference   | Female      | Male        | Difference    | Female       | Male        | Difference  |
| Pooled                    | 80.3        | 82.6        | 2.3         | 39.2        | 46.2        | 7.1          | 41.1        | 36.3        | -4.8          | 19.7         | 17.4        | -2.3        |
|                           | [79.5,81.0] | [82.0,83.1] | [1.6,2.9]   | [38.4,39.9] | [45.5,47.0] | [6.1,8.0]    | [40.3,41.9] | [35.8,36.9] | [-5.6,-4.0]   | [19.0,20.5]  | [16.9,18.0] | [-2.9,-1.6] |
| Least Developed Countries | 77.8        | 80.0        | 2.2         | 32.8        | 39.0        | 6.3          | 45.0        | 41.0        | -4.1          | 22.2         | 20.0        | -2.2        |
|                           | [77.0,78.5] | [79.1,80.9] | [1.0,3.4]   | [31.5,34.0] | [37.9,40.2] | [4.9,7.6]    | [43.9,46.2] | [40.1,41.8] | [-5.3,-2.8]   | [21.5,23.0]  | [19.1,20.9] | [-3.4,-1.0] |
| East Asia & Pacific       | 88.2        | 86.8        | -1.5        | 47.5        | 49.2        | 1.7          | 40.7        | 37.5        | -3.2          | 11.8         | 13.2        | 1.5         |
|                           | [86.1,90.1] | [84.8,88.5] | [-4.2,1.2]  | [44.0,51.1] | [46.4,52.1] | [-3.1,6.5]   | [38.0,43.5] | [34.6,40.5] | [-7.4,1.0]    | [9.9,13.9]   | [11.5,15.2] | [-1.2,4.2]  |
| Cambodia                  | 85.3        | 89.4        | 4.1         | 48.4        | 41.1        | -7.3         | 36.9        | 48.3        | 11.4          | 14.7         | 10.6        | -4.1        |
|                           | [80.2,89.2] | [85.2,92.5] | [-1.4,9.7]  | [42.8,54.0] | [35.4,47.1] | [-15.7,1.1]  | [31.7,42.5] | [42.1,54.6] | [3.2,19.6]    | [10.8,19.8]  | [7.5,14.8]  | [-9.7,1.4]  |
| Indonesia                 | 89.0        | 86.5        | -2.4        | 49.1        | 52.4        | 3.4          | 39.9        | 34.1        | -5.8          | 11.0         | 13.5        | 2.4         |
|                           | [84.9,92.0] | [82.1,90.0] | [-7.3,2.4]  | [43.2,55.0] | [47.9,57.0] | [-3.4,10.1]  | [34.9,45.1] | [30.1,38.3] | [-11.7,0.1]   | [8.0,15.1]   | [10.0,17.9] | [-2.4,7.3]  |
| Lao                       | 90.1        | 92.3        | 2.2         | 42.7        | 40.0        | -2.6         | 47.4        | 52.3        | 4.9           | 9.9          | 7.7         | -2.2        |
|                           | [86.8,92.6] | [89.8,94.2] | [-1.1,5.6]  | [37.9,47.6] | [35.3,44.9] | [-9.5,4.2]   | [41.7,53.2] | [47.0,57.5] | [-3.5,13.2]   | [7.4,13.2]   | [5.8,10.2]  | [-5.6,1.1]  |
| Mongolia                  | 87.6        | 80.6        | -7.0        | 40.6        | 46.2        | 5.5          | 46.9        | 34.4        | -12.5         | 12.4         | 19.4        | 7.0         |
|                           | [76.2,93.9] | [67.7,89.1] | [-20.3,6.3] | [28.7,53.8] | [33.2,59.6] | [-14.6,25.6] | [34.2,60.1] | [23.8,46.9] | [-33.3,8.3]   | [6.1,23.8]   | [10.9,32.3] | [-6.3,20.3] |
| Myanmar                   | 90.1        | 86.2        | -3.9        | 44.7        | 44.2        | -0.5         | 45.4        | 42.1        | -3.4          | 9.9          | 13.8        | 3.9         |
|                           | [85.9,93.2] | [81.6,89.8] | [-9.7,1.8]  | [37.2,52.5] | [36.7,51.9] | [-10.3,9.2]  | [38.3,52.8] | [35.9,48.5] | [-12.8,6.0]   | [6.8,14.1]   | [10.2,18.4] | [-1.8,9.7]  |
| Papua New Guinea          | 83.4        | 78.4        | -5.0        | 42.4        | 48.4        | 6.0          | 41.0        | 30.0        | -11.0         | 16.6         | 21.6        | 5.0         |
|                           | [78.1,87.7] | [72.6,83.3] | [-11.6,1.7] | [35.8,49.3] | [41.0,55.9] | [-5.0,17.0]  | [34.7,47.6] | [22.6,38.7] | [-22.8,0.9]   | [12.3,21.9]  | [16.7,27.4] | [-1.7,11.6] |
| Philippines               | 85.9        | 88.2        | 2.3         | 48.4        | 50.2        | 1.8          | 37.5        | 38.0        | 0.5           | 14.1         | 11.8        | -2.3        |
|                           | [79.8,90.4] | [83.4,91.8] | [-5.1,9.8]  | [40.4,56.4] | [43.1,57.2] | [-8.1,11.8]  | [29.8,45.9] | [31.7,44.8] | [-9.7,10.7]   | [9.6,20.2]   | [8.2,16.6]  | [-9.8,5.1]  |
| Timor-Leste               | 80.7        | 79.8        | -0.8        | 35.5        | 46.0        | 10.5         | 45.1        | 33.8        | -11.3         | 19.3         | 20.2        | 0.8         |
|                           | [74.9,85.4] | [72.9,85.3] | [-9.1,7.4]  | [27.8,44.1] | [38.8,53.4] | [-0.6,21.6]  | [37.9,52.6] | [26.4,42.2] | [-22.6,-0.0]  | [14.6,25.1]  | [14.7,27.1] | [-7.4,9.1]  |
| Tonga                     | NA          | 88.1        | NA          | 52.0        | 40.8        | -11.2        | 48.0        | 47.3        | -0.7          | NA           | 11.9        | NA          |
|                           |             | [63.2,97.0] |             | [18.2,84.1] | [19.2,66.6] | [-68.9,46.5] | [15.9,81.8] | [20.1,76.3] | [-60.0,58.7]  |              | [3.0,36.8]  |             |
| South Asia                | 87.7        | 90.8        | 3.1         | 51.8        | 62.6        | 10.8         | 35.8        | 28.1        | -7.7          | 12.3         | 9.2         | -3.1        |
|                           | [86.9,88.4] | [90.3,91.3] | [2.1,4.1]   | [50.5,53.2] | [61.4,63.9] | [9.1,12.5]   | [34.5,37.2] | [27.0,29.3] | [-9.3,-6.0]   | [11.6,13.1]  | [8.7,9.7]   | [-4.1,-2.1] |
| Afghanistan               | 89.8        | 89.2        | -0.6        | 36.3        | 43.2        | 6.9          | 53.5        | 46.0        | -7.5          | 10.2         | 10.8        | 0.6         |
|                           | [86.5,92.3] | [85.8,91.9] | [-5.8,4.7]  | [32.1,40.8] | [40.3,46.2] | [2.6,11.2]   | [48.7,58.1] | [42.5,49.6] | [-13.8,-1.2]  | [7.7,13.5]   | [8.1,14.2]  | [-4.7,5.8]  |
| Bangladesh                | 88.2        | 89.6        | 1.4         | 60.4        | 66.7        | 6.4          | 27.8        | 22.9        | -4.9          | 11.8         | 10.4        | -1.4        |
|                           | [85.2,90.6] | [87.3,91.5] | [-2.2,5.1]  | [56.4,64.3] | [63.3,70.0] | [1.7,11.0]   | [24.0,31.9] | [19.9,26.1] | [-9.1,-0.7]   | [9.4,14.8]   | [8.5,12.7]  | [-5.1,2.2]  |
| India                     | 87.3        | 90.2        | 2.9         | 52.8        | 63.2        | 10.4         | 34.5        | 27.0        | -7.5          | 12.7         | 9.8         | -2.9        |
|                           | [86.6,88.0] | [89.4,90.8] | [1.7,4.1]   | [51.8,53.9] | [62.0,64.5] | [8.8,11.9]   | [33.4,35.5] | [25.8,28.1] | [-8.8,-6.2]   | [12.0,13.4]  | [9.2,10.6]  | [-4.1,-1.7] |
| Maldives                  | 95.2        | 86.0        | -9.2        | 57.0        | 59.3        | 2.3          | 38.2        | 26.7        | -11.5         | 4.8          | 14.0        | 9.2         |
|                           | [86.3,98.4] | [72.2,93.5] | [-20.9,2.5] | [39.1,73.2] | [39.7,76.3] | [-21.8,26.3] | [23.0,56.1] | [13.9,45.1] | [-30.0,7.0]   | [1.6,13.7]   | [6.5,27.8]  | [-2.5,20.9] |
| Nepal                     | 84.8        | 92.6        | 7.8         | 37.6        | 66.7        | 29.2         | 47.2        | 25.8        | -21.4         | 15.2         | 7.4         | -7.8        |
|                           | [73.9,91.6] | [87.9,95.6] | [-1.3,16.9] | [28.4,47.8] | [59.9,73.0] | [16.7,41.6]  | [38.6,56.0] | [20.2,32.5] | [-32.0,-10.7] | [8.4,26.1]   | [4.4,12.1]  | [-16.9,1.3] |
| Pakistan                  | 88.3        | 93.0        | 4.7         | 49.6        | 63.0        | 13.4         | 38.7        | 30.0        | -8.7          | 11.7         | 7.0         | -4.7        |
|                           | [85.4,90.7] | [91.0,94.6] | [1.5,7.8]   | [44.7,54.5] | [57.8,67.9] | [6.9,19.8]   | [33.6,44.1] | [25.6,34.9] | [-15.0,-2.3]  | [9.3,14.6]   | [5.4,9.0]   | [-7.8,-1.5] |
| Europe & Central Asia     | 92.6        | 90.5        | -2.0        | 46.7        | 51.0        | 4.3          | 45.9        | 39.5        | -6.3          | 7.4          | 9.5         | 2.0         |
|                           | [88.0,95.5] | [85.2,94.1] | [-7.2,3.1]  | [37.0,56.7] | [44.7,57.3] | [-5.7,14.3]  | [36.9,55.1] | [33.1,46.3] | [-17.0,4.3]   | [4.5,12.0]   | [5.9,14.8]  | [-3.1,7.2]  |
| Albania                   | 93.0        | NA          | NA          | 54.2        | 60.3        | 6.1          | 38.8        | 39.7        | 0.9           | 7.0          | NA          | NA          |
|                           | [61.8,99.1] |             |             | [17.1,87.2] | [31.2,83.6] | [-44.5,56.6] | [9.0,80.3]  | [16.4,68.8] | [-45.5,47.3]  | [0.9,38.2]   |             |             |
| Armenia                   | 98.6        | 84.3        | -14.3       | 53.0        | 48.4        | -4.6         | 45.6        | 35.9        | -9.7          | 1.4          | 15.7        | 14.3        |
|                           | [94.4,99.7] | [60.5,95.0] | [-33.6,5.0] | [31.6,73.3] | [24.6,73.0] | [-42.4,33.3] | [25.4,67.4] | [14.5,64.9] | [-50.6,31.1]  | [0.3,5.6]    | [5.0,39.5]  | [-5.0,33.6] |
| Kyrgyz Republic           | 96.4        | 89.5        | -6.9        | 64.0        | 63.2        | -0.8         | 32.4        | 26.3        | -6.1          | 3.6          | 10.5        | 6.9         |
|                           | [90.9,98.7] | [77.7,95.5] | [-16.1,2.2] | [48.6,77.1] | [47.4,76.6] | [-19.3,17.6] | [19.4,48.9] | [15.7,40.6] | [-22.2,10.0]  | [1.3,9.1]    | [4.5,22.3]  | [-2.2,16.1] |
| Moldova                   | 98.1        | 91.0        | -7.1        | 74.7        | 75.8        | 1.1          | 23.4        | 15.2        | -8.2          | 1.9          | 9.0         | 7.1         |

|                            |             |             |              |             |             |              |             |             |              |             |             |              |
|----------------------------|-------------|-------------|--------------|-------------|-------------|--------------|-------------|-------------|--------------|-------------|-------------|--------------|
|                            | [91.4,99.6] | [49.6,99.1] | [-23.0,8.8]  | [51.8,89.0] | [49.0,91.1] | [-29.7,31.9] | [9.4,47.4]  | [4.9,38.6]  | [-34.9,18.5] | [0.4,8.6]   | [0.9,50.4]  | [-8.8,23.0]  |
| Tajikistan                 | 90.7        | 90.8        | 0.1          | 40.7        | 47.2        | 6.5          | 50.0        | 43.6        | -6.3         | 9.3         | 9.2         | -0.1         |
|                            | [81.7,95.5] | [84.4,94.7] | [-8.7,8.9]   | [32.6,49.5] | [38.2,56.3] | [-5.5,18.4]  | [40.8,59.1] | [34.9,52.7] | [-19.8,7.1]  | [4.5,18.3]  | [5.3,15.6]  | [-8.9,8.7]   |
| Turkey                     | 93.0        | 90.9        | -2.1         | 44.6        | 48.3        | 3.7          | 48.4        | 42.6        | -5.8         | 7.0         | 9.1         | 2.1          |
|                            | [83.6,97.2] | [79.9,96.2] | [-10.4,6.3]  | [32.3,57.6] | [34.0,63.0] | [-17.7,25.1] | [34.2,62.8] | [31.2,54.8] | [-27.2,15.7] | [2.8,16.4]  | [3.8,20.1]  | [-6.3,10.4]  |
| Turkmenistan               | 87.3        | 88.0        | 0.8          | 52.4        | 54.7        | 2.4          | 34.9        | 33.3        | -1.6         | 12.7        | 12.0        | -0.8         |
|                            | [77.4,93.2] | [81.9,92.3] | [-8.7,10.2]  | [39.3,65.1] | [46.1,63.1] | [-13.4,18.1] | [22.8,49.2] | [25.1,42.6] | [-17.2,14.0] | [6.8,22.6]  | [7.7,18.1]  | [-10.2,8.7]  |
| Middle East & North Africa | 91.6        | 91.1        | -0.6         | 47.8        | 54.5        | 6.7          | 43.8        | 36.6        | -7.2         | 8.4         | 8.9         | 0.6          |
|                            | [90.0,93.0] | [89.1,92.7] | [-3.3,2.2]   | [45.4,50.3] | [51.5,57.5] | [2.1,11.3]   | [41.5,46.2] | [33.8,39.4] | [-11.7,-2.8] | [7.0,10.0]  | [7.3,10.9]  | [-2.2,3.3]   |
| Egypt                      | 92.8        | 90.4        | -2.3         | 49.9        | 57.5        | 7.6          | 42.9        | 33.0        | -10.0        | 7.2         | 9.6         | 2.3          |
|                            | [89.8,94.9] | [85.5,93.8] | [-7.3,2.6]   | [44.1,55.6] | [52.2,62.5] | [0.4,14.8]   | [37.8,48.3] | [28.9,37.3] | [-16.7,-3.2] | [5.1,10.2]  | [6.2,14.5]  | [-2.6,7.3]   |
| Iraq                       | 90.2        | 90.6        | 0.4          | 52.9        | 52.6        | -0.3         | 37.4        | 38.0        | 0.7          | 9.8         | 9.4         | -0.4         |
|                            | [85.0,93.8] | [87.5,93.0] | [-4.3,5.0]   | [46.1,59.5] | [47.1,58.0] | [-9.2,8.6]   | [31.9,43.2] | [32.6,43.8] | [-6.8,8.1]   | [6.2,15.0]  | [7.0,12.5]  | [-5.0,4.3]   |
| Jordan                     | 93.2        | 91.5        | -1.7         | 48.4        | 60.0        | 11.6         | 44.8        | 31.5        | -13.3        | 6.8         | 8.5         | 1.7          |
|                            | [84.1,97.2] | [86.0,94.9] | [-8.5,5.1]   | [36.0,61.0] | [49.9,69.3] | [-2.5,25.7]  | [32.5,57.7] | [23.7,40.5] | [-27.3,0.7]  | [2.8,15.9]  | [5.1,14.0]  | [-5.1,8.5]   |
| State of Palestine         | 91.0        | 90.3        | -0.7         | 48.1        | 51.8        | 3.7          | 42.9        | 38.5        | -4.4         | 9.0         | 9.7         | 0.7          |
|                            | [83.7,95.2] | [84.7,93.9] | [-7.2,5.7]   | [40.8,55.5] | [43.1,60.3] | [-7.8,15.1]  | [35.6,50.6] | [30.7,47.0] | [-15.6,6.8]  | [4.8,16.3]  | [6.1,15.3]  | [-5.7,7.2]   |
| Tunisia                    | 92.5        | 91.5        | -1.0         | 64.5        | 55.6        | -8.9         | 28.0        | 35.9        | 7.9          | 7.5         | 8.5         | 1.0          |
|                            | [77.4,97.8] | [82.3,96.2] | [-12.3,10.3] | [46.7,79.1] | [44.1,66.5] | [-30.0,12.2] | [15.5,45.2] | [25.8,47.4] | [-12.9,28.7] | [2.2,22.6]  | [3.8,17.7]  | [-10.3,12.3] |
| Yemen                      | 90.4        | 92.2        | 1.8          | 40.7        | 50.9        | 10.2         | 49.7        | 41.3        | -8.4         | 9.6         | 7.8         | -1.8         |
|                            | [87.9,92.5] | [89.6,94.2] | [-0.5,4.1]   | [36.4,45.2] | [46.4,55.5] | [3.7,16.7]   | [45.4,54.0] | [36.6,46.1] | [-15.0,-1.8] | [7.5,12.1]  | [5.8,10.4]  | [-4.1,0.5]   |
| Eastern & Southern Africa  | 80.4        | 83.3        | 2.9          | 35.3        | 42.7        | 7.4          | 45.1        | 40.6        | -4.5         | 19.6        | 16.7        | -2.9         |
|                            | [78.9,81.8] | [81.9,84.5] | [1.3,4.5]    | [33.7,36.9] | [40.7,44.7] | [5.1,9.7]    | [43.4,46.7] | [39.1,42.1] | [-6.4,-2.6]  | [18.2,21.1] | [15.5,18.1] | [-4.5,-1.3]  |
| Angola                     | 72.9        | 76.8        | 3.9          | 25.9        | 34.6        | 8.7          | 47.0        | 42.2        | -4.8         | 27.1        | 23.2        | -3.9         |
|                            | [69.2,76.3] | [73.2,80.0] | [0.1,7.7]    | [22.0,30.1] | [30.1,39.4] | [2.4,15.1]   | [42.7,51.3] | [38.1,46.3] | [-10.3,0.6]  | [23.7,30.8] | [20.0,26.8] | [-7.7,-0.1]  |
| Burundi                    | 74.5        | 77.1        | 2.6          | 29.8        | 31.1        | 1.3          | 44.7        | 46.1        | 1.3          | 25.5        | 22.9        | -2.6         |
|                            | [70.7,78.0] | [74.0,80.0] | [-1.9,7.1]   | [26.3,33.5] | [27.5,34.8] | [-3.5,6.0]   | [40.8,48.8] | [43.4,48.7] | [-3.8,6.4]   | [22.0,29.3] | [20.0,26.0] | [-7.1,-1.9]  |
| Comoros                    | 78.3        | 89.5        | 11.1         | 44.3        | 58.0        | 13.8         | 34.1        | 31.4        | -2.6         | 21.7        | 10.5        | -11.1        |
|                            | [69.3,85.3] | [83.5,93.5] | [1.9,20.3]   | [33.5,55.6] | [50.1,65.6] | [0.5,27.0]   | [24.6,45.0] | [24.2,39.7] | [-13.9,8.6]  | [14.7,30.7] | [6.5,16.5]  | [-20.3,-1.9] |
| Ethiopia                   | 80.5        | 86.4        | 5.9          | 39.1        | 51.7        | 12.6         | 41.4        | 34.7        | -6.7         | 19.5        | 13.6        | -5.9         |
|                            | [76.2,84.1] | [82.7,89.4] | [0.8,11.1]   | [33.0,45.4] | [46.6,56.7] | [5.5,19.8]   | [35.9,47.1] | [30.8,38.8] | [-12.9,-0.5] | [15.9,23.8] | [10.6,17.3] | [-11.1,-0.8] |
| Kenya                      | 83.7        | 83.6        | -0.1         | 39.5        | 42.2        | 2.7          | 44.2        | 41.5        | -2.7         | 16.3        | 16.4        | 0.1          |
|                            | [80.3,86.6] | [80.2,86.6] | [-4.0,3.9]   | [35.1,44.2] | [37.9,46.6] | [-1.7,7.0]   | [39.8,48.7] | [37.5,45.5] | [-7.8,2.4]   | [13.4,19.7] | [13.4,19.8] | [-3.9,4.0]   |
| Lesotho                    | 86.0        | 91.2        | 5.2          | 50.3        | 46.3        | -4.0         | 35.6        | 44.9        | 9.3          | 14.0        | 8.8         | -5.2         |
|                            | [76.8,91.9] | [84.9,95.0] | [-3.0,13.4]  | [39.4,61.2] | [39.4,53.3] | [-15.2,7.1]  | [26.5,46.0] | [36.8,53.3] | [-2.2,20.7]  | [8.1,23.2]  | [5.0,15.1]  | [-13.4,3.0]  |
| Madagascar                 | 74.7        | 74.9        | 0.2          | 35.9        | 36.1        | 0.1          | 38.8        | 38.8        | 0.0          | 25.3        | 25.1        | -0.2         |
|                            | [70.6,78.4] | [71.4,78.0] | [-4.7,5.1]   | [31.8,40.3] | [32.1,40.2] | [-5.1,5.4]   | [34.7,43.0] | [35.1,42.6] | [-4.0,4.1]   | [21.6,29.4] | [22.0,28.6] | [-5.1,4.7]   |
| Malawi                     | 75.1        | 77.6        | 2.5          | 31.7        | 38.3        | 6.6          | 43.4        | 39.3        | -4.1         | 24.9        | 22.4        | -2.5         |
|                            | [71.7,78.2] | [74.4,80.6] | [-1.0,6.1]   | [28.3,35.3] | [35.0,41.8] | [3.1,10.1]   | [39.8,47.0] | [36.4,42.3] | [-8.5,0.4]   | [21.8,28.3] | [19.4,25.6] | [-6.1,1.0]   |
| Mozambique                 | 79.2        | 78.7        | -0.5         | 26.5        | 32.4        | 5.9          | 52.8        | 46.4        | -6.4         | 20.8        | 21.3        | 0.5          |
|                            | [75.6,82.5] | [75.3,81.8] | [-5.1,4.1]   | [23.1,30.2] | [28.8,36.2] | [0.4,11.4]   | [48.8,56.7] | [42.4,50.4] | [-12.1,-0.7] | [17.5,24.4] | [18.2,24.7] | [-4.1,5.1]   |
| Namibia                    | 82.4        | 82.1        | -0.3         | 26.4        | 36.5        | 10.1         | 56.0        | 45.6        | -10.4        | 17.6        | 17.9        | 0.3          |
|                            | [75.9,87.4] | [77.0,86.2] | [-8.7,8.1]   | [20.4,33.3] | [30.1,43.3] | [2.0,18.3]   | [48.5,63.3] | [39.2,52.2] | [-19.9,-0.9] | [12.6,24.1] | [13.8,23.0] | [-8.1,8.7]   |
| Rwanda                     | 77.6        | 76.8        | -0.8         | 31.0        | 35.1        | 4.1          | 46.6        | 41.7        | -4.9         | 22.4        | 23.2        | 0.8          |
|                            | [73.8,81.0] | [73.6,79.7] | [-5.5,3.9]   | [27.6,34.7] | [31.2,39.1] | [-0.8,8.9]   | [42.4,50.8] | [37.9,45.7] | [-10.8,1.1]  | [19.0,26.2] | [20.3,26.4] | [-3.9,5.5]   |
| South Africa               | 93.1        | 91.9        | -1.2         | 45.2        | 51.3        | 6.1          | 47.9        | 40.5        | -7.3         | 6.9         | 8.1         | 1.2          |
|                            | [87.7,96.2] | [86.7,95.1] | [-7.1,4.6]   | [31.4,59.9] | [41.6,61.0] | [-9.5,21.7]  | [34.0,62.0] | [31.5,50.3] | [-22.5,7.8]  | [3.8,12.3]  | [4.9,13.3]  | [-4.6,7.1]   |
| South Sudan                | 81.7        | 81.8        | 0.2          | 35.8        | 38.2        | 2.5          | 45.9        | 43.6        | -2.3         | 18.3        | 18.2        | -0.2         |
|                            | [78.2,84.7] | [78.7,84.6] | [-3.4,3.8]   | [30.2,41.8] | [34.2,42.4] | [-1.6,6.6]   | [40.5,51.4] | [40.1,47.2] | [-6.8,2.2]   | [15.3,21.8] | [15.4,21.3] | [-3.8,3.4]   |
| Sudan                      | 86.9        | 86.5        | -0.4         | 40.9        | 46.6        | 5.8          | 46.0        | 39.9        | -6.2         | 13.1        | 13.5        | 0.4          |
|                            | [83.5,89.7] | [83.6,89.0] | [-4.8,4.0]   | [36.5,45.4] | [43.1,50.3] | [0.9,10.7]   | [41.5,50.6] | [36.5,43.4] | [-12.1,-0.2] | [10.3,16.5] | [11.0,16.4] | [-4.0,4.8]   |
| Swaziland                  | 89.9        | 84.5        | -5.4         | 25.3        | 21.6        | -3.7         | 64.6        | 62.9        | -1.7         | 10.1        | 15.5        | 5.4          |

|                           |             |             |              |             |             |             |             |             |              |             |             |              |
|---------------------------|-------------|-------------|--------------|-------------|-------------|-------------|-------------|-------------|--------------|-------------|-------------|--------------|
|                           | [83.7,93.9] | [77.3,89.7] | [-13.5,2.7]  | [18.7,33.4] | [15.1,29.9] | [-12.7,5.3] | [55.8,72.4] | [55.6,69.6] | [-14.4,11.0] | [6.1,16.3]  | [10.3,22.7] | [-2.7,13.5]  |
| Tanzania                  | 78.6        | 86.9        | 8.3          | 33.2        | 40.9        | 7.6         | 45.3        | 46.0        | 0.7          | 21.4        | 13.1        | -8.3         |
|                           | [74.1,82.5] | [83.8,89.5] | [-3.2,13.5]  | [28.9,37.9] | [37.0,44.9] | [2.0,13.3]  | [41.0,49.8] | [42.1,50.0] | [-4.7,6.1]   | [17.5,25.9] | [10.5,16.2] | [-13.5,-3.2] |
| Uganda                    | 80.0        | 81.0        | 1.0          | 35.8        | 38.8        | 3.0         | 44.3        | 42.3        | -2.0         | 20.0        | 19.0        | -1.0         |
|                           | [76.7,83.0] | [78.1,83.7] | [-3.5,5.5]   | [33.0,38.6] | [35.9,41.7] | [-1.0,7.0]  | [40.6,48.0] | [39.1,45.5] | [-7.2,3.2]   | [17.0,23.3] | [16.3,21.9] | [-5.5,3.5]   |
| Zambia                    | 80.7        | 79.3        | -1.4         | 34.0        | 43.0        | 8.9         | 46.7        | 36.4        | -10.3        | 19.3        | 20.7        | 1.4          |
|                           | [76.4,84.3] | [75.2,82.9] | [-7.5,4.8]   | [27.9,40.8] | [37.5,48.6] | [-0.8,18.7] | [41.7,51.7] | [32.7,40.2] | [-17.0,-3.6] | [15.7,23.6] | [17.1,24.8] | [-4.8,7.5]   |
| Zimbabwe                  | 83.3        | 84.9        | 1.6          | 40.2        | 45.9        | 5.7         | 43.0        | 39.0        | -4.1         | 16.7        | 15.1        | -1.6         |
|                           | [77.7,87.7] | [81.0,88.0] | [-4.2,7.5]   | [35.0,45.7] | [40.3,51.6] | [-0.6,12.0] | [37.4,48.8] | [33.7,44.5] | [-10.7,2.6]  | [12.3,22.3] | [12.0,19.0] | [-7.5,4.2]   |
| West & Central Africa     | 69.8        | 71.4        | 1.6          | 26.8        | 30.7        | 3.9         | 43.0        | 40.7        | -2.3         | 30.2        | 28.6        | -1.6         |
|                           | [68.8,70.8] | [70.3,72.5] | [0.5,2.7]    | [25.6,28.1] | [29.8,31.7] | [2.7,5.1]   | [42.0,44.0] | [39.7,41.7] | [-3.4,-1.2]  | [29.2,31.2] | [27.5,29.7] | [-2.7,-0.5]  |
| Benin                     | 70.9        | 73.4        | 2.6          | 27.7        | 35.4        | 7.7         | 43.2        | 38.1        | -5.1         | 29.1        | 26.6        | -2.6         |
|                           | [67.6,73.9] | [70.7,76.0] | [-1.0,6.1]   | [25.1,30.3] | [32.1,38.8] | [3.9,11.5]  | [39.6,46.8] | [34.9,41.4] | [-9.9,-0.4]  | [26.1,32.4] | [24.0,29.3] | [-6.1,1.0]   |
| Burkina Faso              | 70.8        | 72.1        | 1.3          | 21.8        | 24.5        | 2.7         | 49.0        | 47.6        | -1.4         | 29.2        | 27.4        | -1.3         |
|                           | [69.0,72.6] | [70.0,74.1] | [-1.4,4.0]   | [20.0,23.7] | [22.4,26.7] | [-0.0,5.4]  | [46.7,51.3] | [44.9,50.3] | [-4.7,1.9]   | [27.4,31.0] | [25.9,30.0] | [-4.0,1.4]   |
| Cameroon                  | 71.8        | 73.4        | 1.6          | 31.9        | 34.2        | 2.4         | 39.9        | 39.2        | -0.7         | 28.2        | 26.6        | -1.6         |
|                           | [68.0,75.2] | [69.9,76.6] | [-3.4,6.6]   | [27.8,36.2] | [30.6,38.1] | [-2.8,7.5]  | [35.3,44.7] | [35.3,43.1] | [-6.6,5.2]   | [24.8,32.0] | [23.4,30.1] | [-6.6,3.4]   |
| Chad                      | 71.2        | 74.2        | 3.0          | 21.0        | 27.4        | 6.4         | 50.2        | 46.8        | -3.4         | 28.8        | 25.8        | -3.0         |
|                           | [67.6,74.6] | [70.6,77.6] | [-0.2,6.2]   | [18.9,23.4] | [25.6,29.4] | [3.5,9.3]   | [46.7,53.7] | [43.4,50.2] | [-6.1,-0.7]  | [25.4,32.4] | [22.4,29.4] | [-6.2,0.2]   |
| Congo                     | 77.3        | 68.8        | -8.4         | 27.4        | 31.9        | 4.4         | 49.9        | 37.0        | -12.9        | 22.7        | 31.2        | 8.4          |
|                           | [71.4,82.2] | [63.8,73.5] | [-16.1,-0.8] | [21.8,33.8] | [26.8,37.5] | [-3.3,12.2] | [42.8,56.9] | [32.3,41.8] | [-22.2,-3.6] | [17.8,28.6] | [26.5,36.2] | [0.8,16.1]   |
| Congo (DR)                | 73.6        | 73.0        | -0.6         | 26.0        | 28.0        | 2.1         | 47.7        | 45.0        | -2.7         | 26.4        | 27.0        | 0.6          |
|                           | [71.3,75.8] | [70.0,75.9] | [-4.1,2.9]   | [22.8,29.4] | [24.9,31.5] | [-2.4,6.6]  | [44.0,51.4] | [42.1,47.9] | [-6.6,1.2]   | [24.2,28.7] | [24.1,30.0] | [-2.9,4.1]   |
| Cote D'Ivoire             | 78.9        | 78.3        | -0.6         | 33.5        | 36.3        | 2.8         | 45.4        | 42.0        | -3.4         | 21.1        | 21.7        | 0.6          |
|                           | [75.3,82.1] | [73.7,82.3] | [-5.2,4.0]   | [29.3,37.9] | [32.9,39.8] | [-2.8,8.5]  | [40.7,50.2] | [37.7,46.4] | [-8.3,1.5]   | [17.9,24.7] | [17.7,26.3] | [-4.0,5.2]   |
| Gabon                     | 81.1        | 77.9        | -3.2         | 42.0        | 38.3        | -3.8        | 39.0        | 39.6        | 0.6          | 18.9        | 22.1        | 3.2          |
|                           | [73.5,86.9] | [71.2,83.4] | [-13.9,7.5]  | [32.3,52.5] | [31.0,46.1] | [-14.6,7.1] | [30.9,47.8] | [31.5,48.3] | [-8.5,9.6]   | [13.1,26.5] | [16.6,28.8] | [-7.5,13.9]  |
| Gambia                    | 79.7        | 82.6        | 2.9          | 45.0        | 52.9        | 7.9         | 34.8        | 29.8        | -5.0         | 20.3        | 17.4        | -2.9         |
|                           | [74.5,84.1] | [79.0,85.7] | [-3.1,8.9]   | [39.5,50.6] | [47.7,58.1] | [-0.2,16.0] | [29.7,40.2] | [25.4,34.6] | [-11.7,1.7]  | [15.9,25.5] | [14.3,21.0] | [-8.9,3.1]   |
| Ghana                     | 80.2        | 77.2        | -3.0         | 43.1        | 44.8        | 1.6         | 37.1        | 32.4        | -4.6         | 19.8        | 22.8        | 3.0          |
|                           | [75.3,84.4] | [70.3,82.9] | [-10.5,4.4]  | [35.5,51.2] | [39.5,50.2] | [-7.4,10.6] | [30.8,43.8] | [26.6,38.9] | [-12.2,2.9]  | [15.6,24.7] | [17.1,29.7] | [-4.4,10.5]  |
| Guinea                    | 73.0        | 74.7        | 1.7          | 28.3        | 32.8        | 4.5         | 44.7        | 41.9        | -2.8         | 27.0        | 25.3        | -1.7         |
|                           | [69.3,76.5] | [71.6,77.6] | [-3.3,6.7]   | [25.0,31.9] | [28.7,37.2] | [-0.3,9.2]  | [40.4,49.2] | [37.9,46.1] | [-8.0,2.4]   | [23.5,30.7] | [22.4,28.4] | [-6.7,3.3]   |
| Liberia                   | 78.0        | 80.0        | 2.0          | 27.0        | 32.5        | 5.5         | 51.0        | 47.5        | -3.5         | 22.0        | 20.0        | -2.0         |
|                           | [73.4,82.0] | [77.0,82.7] | [-3.1,7.1]   | [22.6,31.9] | [28.4,36.9] | [-0.5,11.5] | [44.4,57.5] | [43.2,51.9] | [-10.7,3.8]  | [18.0,26.6] | [17.3,23.0] | [-7.1,3.1]   |
| Mali                      | 66.9        | 68.3        | 1.5          | 29.4        | 31.4        | 2.1         | 37.5        | 36.9        | -0.6         | 33.1        | 31.7        | -1.5         |
|                           | [63.0,70.5] | [65.4,71.1] | [-3.0,6.0]   | [25.4,33.6] | [27.7,35.4] | [-1.8,5.9]  | [34.2,41.0] | [33.5,40.4] | [-4.9,3.7]   | [29.5,37.0] | [28.9,34.6] | [-6.0,3.0]   |
| Mauritania                | 82.7        | 85.8        | 3.1          | 48.6        | 55.5        | 6.9         | 34.1        | 30.3        | -3.8         | 17.3        | 14.2        | -3.1         |
|                           | [78.2,86.4] | [81.4,89.3] | [-3.0,9.3]   | [43.2,54.0] | [50.1,60.7] | [-0.3,14.1] | [28.7,39.9] | [26.0,35.1] | [-10.9,3.4]  | [13.6,21.8] | [10.7,18.6] | [-9.3,3.0]   |
| Niger                     | 61.8        | 65.3        | 3.5          | 16.9        | 23.8        | 6.9         | 44.9        | 41.5        | -3.4         | 38.2        | 34.7        | -3.5         |
|                           | [59.4,64.2] | [62.5,68.1] | [0.1,6.9]    | [15.1,18.9] | [21.3,26.5] | [4.5,9.4]   | [42.5,47.4] | [38.8,44.3] | [-6.3,-0.6]  | [35.8,40.6] | [31.9,37.5] | [-6.9,-0.1]  |
| Nigeria                   | 66.9        | 69.4        | 2.6          | 26.5        | 30.5        | 4.0         | 40.4        | 38.9        | -1.5         | 33.1        | 30.6        | -2.6         |
|                           | [65.1,68.7] | [67.4,71.4] | [0.1,5.0]    | [24.2,28.8] | [28.4,32.7] | [1.7,6.4]   | [38.5,42.4] | [36.9,40.9] | [-3.7,0.7]   | [31.3,34.9] | [28.6,32.6] | [-5.0,-0.1]  |
| Sao Tome & Principe       | 89.1        | 79.0        | -10.1        | 35.3        | 46.4        | 11.2        | 53.9        | 32.6        | -21.2        | 10.9        | 21.0        | 10.1         |
|                           | [75.7,95.6] | [69.5,86.2] | [-21.6,1.5]  | [22.7,50.2] | [35.9,57.3] | [-6.2,28.5] | [39.7,67.4] | [23.4,43.4] | [-38.1,-4.4] | [4.4,24.3]  | [13.8,30.5] | [-1.5,21.6]  |
| Senegal                   | 82.2        | 85.0        | 2.8          | 47.4        | 51.1        | 3.7         | 34.8        | 33.9        | -0.9         | 17.8        | 15.0        | -2.8         |
|                           | [76.1,87.0] | [79.6,89.2] | [-3.9,9.5]   | [40.2,54.7] | [44.7,57.5] | [-6.2,13.7] | [29.1,41.1] | [28.2,40.2] | [-10.4,8.5]  | [13.0,23.9] | [10.8,20.4] | [-9.5,3.9]   |
| Sierra Leone              | 77.9        | 77.1        | -0.8         | 21.2        | 26.0        | 4.8         | 56.7        | 51.1        | -5.7         | 22.1        | 22.9        | 0.8          |
|                           | [74.7,80.8] | [73.0,80.7] | [-6.3,4.6]   | [18.2,24.5] | [23.1,29.1] | [0.5,9.2]   | [53.3,60.0] | [47.5,54.7] | [-10.0,-1.3] | [19.2,25.3] | [19.3,27.0] | [-4.6,6.3]   |
| Togo                      | 70.5        | 66.7        | -3.8         | 38.1        | 37.0        | -1.1        | 32.5        | 29.7        | -2.7         | 29.5        | 33.3        | 3.8          |
|                           | [63.0,77.1] | [60.9,72.1] | [-11.8,4.2]  | [30.5,46.3] | [31.4,43.0] | [-10.7,8.6] | [25.8,39.9] | [23.8,36.4] | [-13.0,7.6]  | [22.9,37.0] | [27.9,39.1] | [-4.2,11.8]  |
| Latin America & Caribbean | 88.4        | 90.0        | 1.6          | 47.0        | 49.4        | 2.4         | 41.4        | 40.6        | -0.8         | 11.6        | 10.0        | -1.6         |

|                               |             |             |              |             |             |              |             |             |              |             |             |              |
|-------------------------------|-------------|-------------|--------------|-------------|-------------|--------------|-------------|-------------|--------------|-------------|-------------|--------------|
|                               | [86.2,90.3] | [88.7,91.1] | [-0.4,3.5]   | [43.9,50.2] | [46.5,52.3] | [-2.0,6.7]   | [38.8,44.0] | [37.6,43.6] | [-5.0,3.4]   | [9.7,13.8]  | [8.9,11.3]  | [-3.5,0.4]   |
| Colombia                      | 92.7        | 93.3        | 0.6          | 49.4        | 54.9        | 5.5          | 43.3        | 38.5        | -4.9         | 7.3         | 6.7         | -0.6         |
|                               | [88.5,95.5] | [88.8,96.1] | [-3.4,4.7]   | [40.3,58.5] | [46.7,62.8] | [-7.9,18.8]  | [34.3,52.8] | [30.8,46.7] | [-17.9,8.2]  | [4.5,11.5]  | [3.9,11.2]  | [-4.7,3.4]   |
| Dominican Republic            | 92.4        | 94.3        | 1.9          | 70.7        | 70.1        | -0.5         | 21.7        | 24.2        | 2.5          | 7.6         | 5.7         | -1.9         |
|                               | [87.2,95.6] | [91.2,96.4] | [-2.8,6.7]   | [63.1,77.2] | [62.5,76.8] | [-10.6,9.5]  | [15.8,29.0] | [17.8,31.9] | [-7.3,12.2]  | [4.4,12.8]  | [3.6,8.8]   | [-6.7,2.8]   |
| El Salvador                   | 91.6        | 90.5        | -1.0         | 45.0        | 54.7        | 9.7          | 46.6        | 35.8        | -10.8        | 8.4         | 9.5         | 1.0          |
|                               | [78.9,96.9] | [79.3,96.0] | [-10.8,8.7]  | [31.3,59.5] | [44.1,64.9] | [-7.3,26.8]  | [32.9,60.8] | [26.2,46.8] | [-28.3,6.8]  | [3.1,21.1]  | [4.0,20.7]  | [-8.7,10.8]  |
| Guatemala                     | 89.8        | 91.5        | 1.8          | 41.0        | 49.1        | 8.1          | 48.7        | 42.4        | -6.3         | 10.2        | 8.5         | -1.8         |
|                               | [84.7,93.3] | [88.0,94.1] | [-2.2,5.7]   | [35.0,47.3] | [43.4,54.9] | [-0.7,16.9]  | [43.2,54.3] | [36.3,48.7] | [-14.8,2.1]  | [6.7,15.3]  | [5.9,12.0]  | [-5.7,2.2]   |
| Guyana                        | 86.9        | 94.6        | 7.7          | 54.9        | 60.3        | 5.4          | 32.0        | 34.3        | 2.3          | 13.1        | 5.4         | -7.7         |
|                               | [69.4,95.1] | [86.2,98.0] | [-4.8,20.2]  | [41.5,67.6] | [45.4,73.5] | [-13.6,24.5] | [19.9,47.2] | [21.7,49.6] | [-17.1,21.6] | [4.9,30.6]  | [2.0,13.8]  | [-20.2,4.8]  |
| Haiti                         | 82.5        | 83.9        | 1.4          | 39.5        | 36.9        | -2.6         | 43.0        | 46.9        | 3.9          | 17.5        | 16.1        | -1.4         |
|                               | [78.1,86.2] | [79.5,87.5] | [-4.2,6.9]   | [34.3,45.0] | [30.8,43.5] | [-9.9,4.8]   | [38.4,47.7] | [40.9,53.1] | [-2.4,10.3]  | [13.8,21.9] | [12.5,20.5] | [-6.9,4.2]   |
| Honduras                      | 87.5        | 91.2        | 3.7          | 57.9        | 54.6        | -3.3         | 29.6        | 36.6        | 7.0          | 12.5        | 8.8         | -3.7         |
|                               | [82.9,91.0] | [87.2,94.1] | [-1.7,9.2]   | [50.6,64.9] | [47.1,62.0] | [-11.6,5.0]  | [24.0,35.8] | [29.6,44.2] | [-0.6,14.7]  | [9.0,17.1]  | [5.9,12.8]  | [-9.2,1.7]   |
| Paraguay                      | 96.8        | 96.8        | -0.0         | 30.5        | 50.8        | 20.3         | 66.3        | 46.0        | -20.3        | 3.2         | 3.2         | 0.0          |
|                               | [91.9,98.8] | [88.9,99.1] | [-4.4,4.3]   | [19.6,44.2] | [37.5,64.0] | [2.8,37.8]   | [52.2,78.0] | [32.7,59.9] | [-38.6,-2.0] | [1.2,8.1]   | [0.9,11.1]  | [-4.3,4.4]   |
| Peru                          | 87.8        | 90.5        | 2.7          | 49.3        | 50.2        | 0.9          | 38.5        | 40.3        | 1.8          | 12.2        | 9.5         | -2.7         |
|                               | [81.3,92.3] | [85.2,94.0] | [-4.8,10.2]  | [41.9,56.8] | [42.6,57.8] | [-9.1,10.8]  | [31.5,45.9] | [31.8,49.4] | [-9.7,13.3]  | [7.7,18.7]  | [6.0,14.8]  | [-10.2,4.8]  |
| Suriname                      | 90.1        | 90.1        | -0.0         | 65.0        | 66.3        | 1.3          | 25.1        | 23.8        | -1.3         | 9.9         | 9.9         | 0.0          |
|                               | [68.6,97.4] | [82.2,94.7] | [-12.5,12.4] | [43.7,81.6] | [50.8,78.9] | [-22.0,24.6] | [12.7,43.6] | [13.0,39.4] | [-21.2,18.5] | [2.6,31.4]  | [5.3,17.8]  | [-12.4,12.5] |
| Low-Income Countries          | 76.3        | 78.3        | 2.0          | 30.2        | 36.3        | 6.1          | 46.1        | 42.0        | -4.1         | 23.7        | 21.7        | -2.0         |
|                               | [75.4,77.2] | [77.5,79.1] | [0.7,3.3]    | [28.8,31.7] | [34.9,37.8] | [4.5,7.7]    | [44.8,47.4] | [40.8,43.1] | [-5.5,-2.8]  | [22.8,24.6] | [20.9,22.5] | [-3.3,-0.7]  |
| Lower-Middle-Income Countries | 81.0        | 83.8        | 2.8          | 42.4        | 50.2        | 7.8          | 38.6        | 33.6        | -5.1         | 19.0        | 16.2        | -2.8         |
|                               | [80.3,81.7] | [83.1,84.5] | [1.9,3.6]    | [41.3,43.4] | [49.3,51.2] | [6.3,9.3]    | [37.5,39.7] | [32.8,34.3] | [-6.4,-3.7]  | [18.3,19.7] | [15.5,16.9] | [-3.6,-1.9]  |
| Upper-Middle-Income Countries | 90.3        | 89.0        | -1.3         | 48.1        | 52.1        | 4.0          | 42.2        | 36.9        | -5.3         | 9.7         | 11.0        | 1.3          |
|                               | [88.3,92.0] | [86.9,90.8] | [-3.8,1.2]   | [45.1,51.1] | [48.1,56.1] | [-0.9,8.9]   | [39.2,45.2] | [33.2,40.7] | [-9.7,-0.9]  | [8.0,11.7]  | [9.2,13.1]  | [-1.2,3.8]   |

Notes: 95% confidence intervals are shown in brackets.



**eFigure 1.** Mortality Rate Among Children Younger Than 5 Years and Share of These Deaths Occurring at Different Ages: Pooled, Least Developed Countries, Regions, and World Bank Income Groups: Period Restricted to 5 Years Before Survey Instead of 10 Years

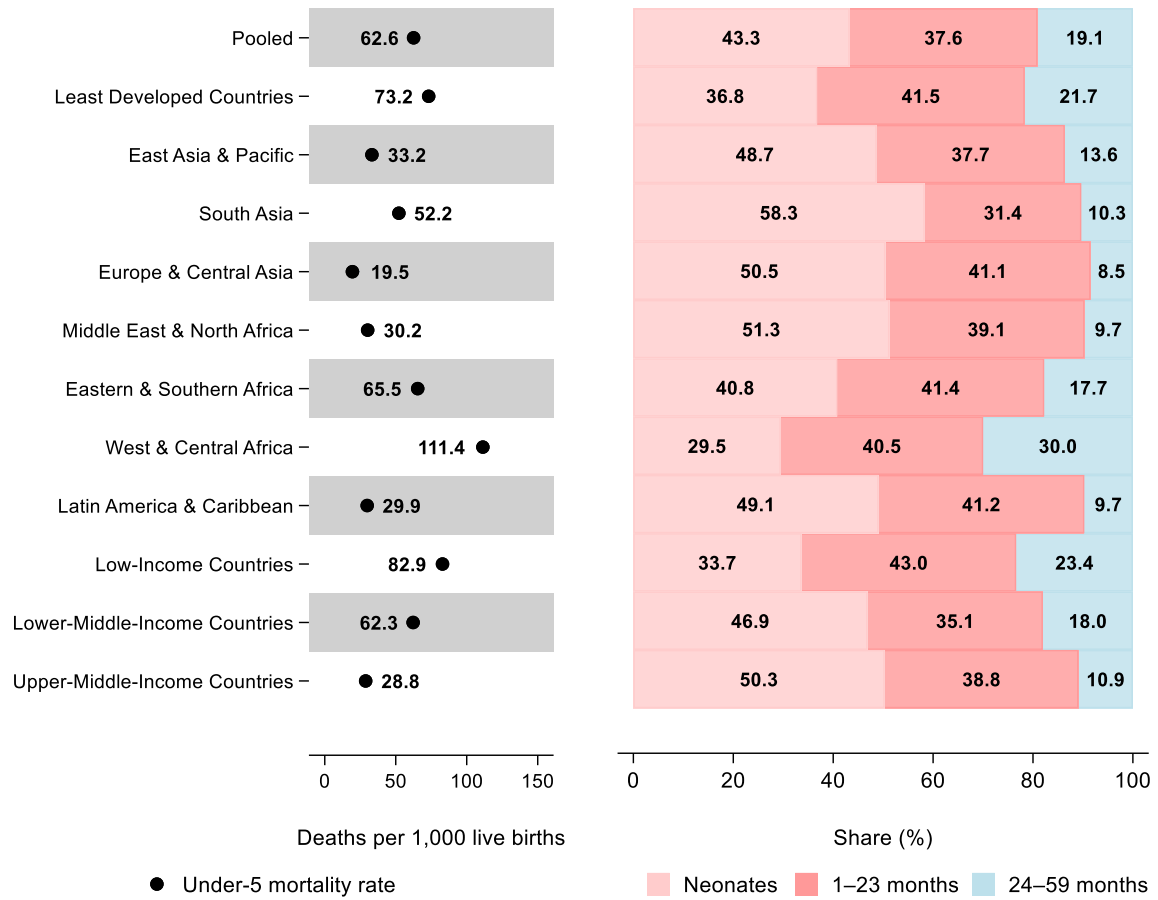

Notes: 95% confidence intervals are shown for mortality rates (some confidence intervals may be narrower than symbols). See eTable 2 in the Supplement for tabulated estimates and confidence intervals.

**eFigure 2.** Share of Deaths Among Children Younger Than 5 Years Occurring at Different Ages Using Detailed Age Intervals: Pooled, Least Developed Countries, Regions, and World Bank Income Groups: Period Restricted to 5 Years Before Survey Instead of 10 Years

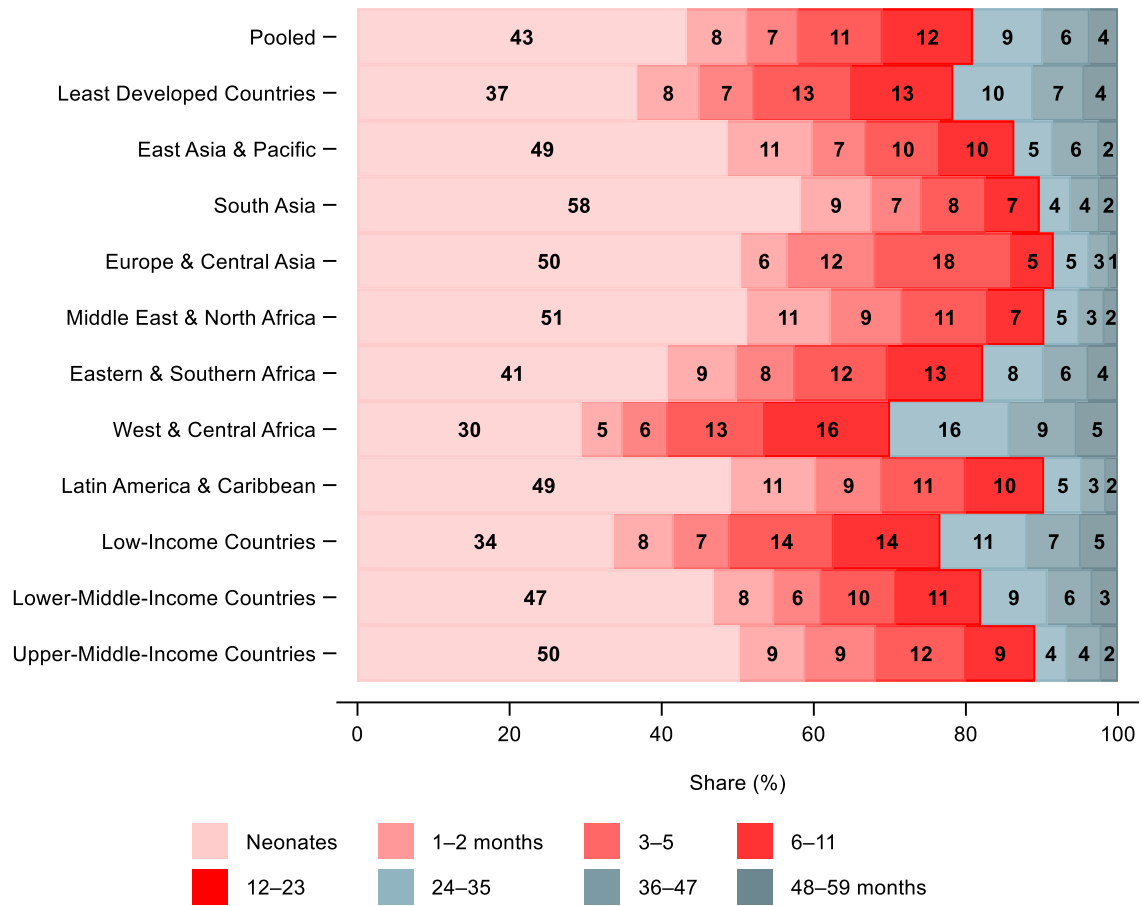

Notes: See eTable 3 in the Supplement for tabulated estimates and confidence intervals.

**eFigure 3.** Mortality Rate Among Children Younger Than 5 Years and Share of These Deaths Occurring at Different Ages by Country: Period Restricted to 5 Years Before Survey Instead of 10 Years

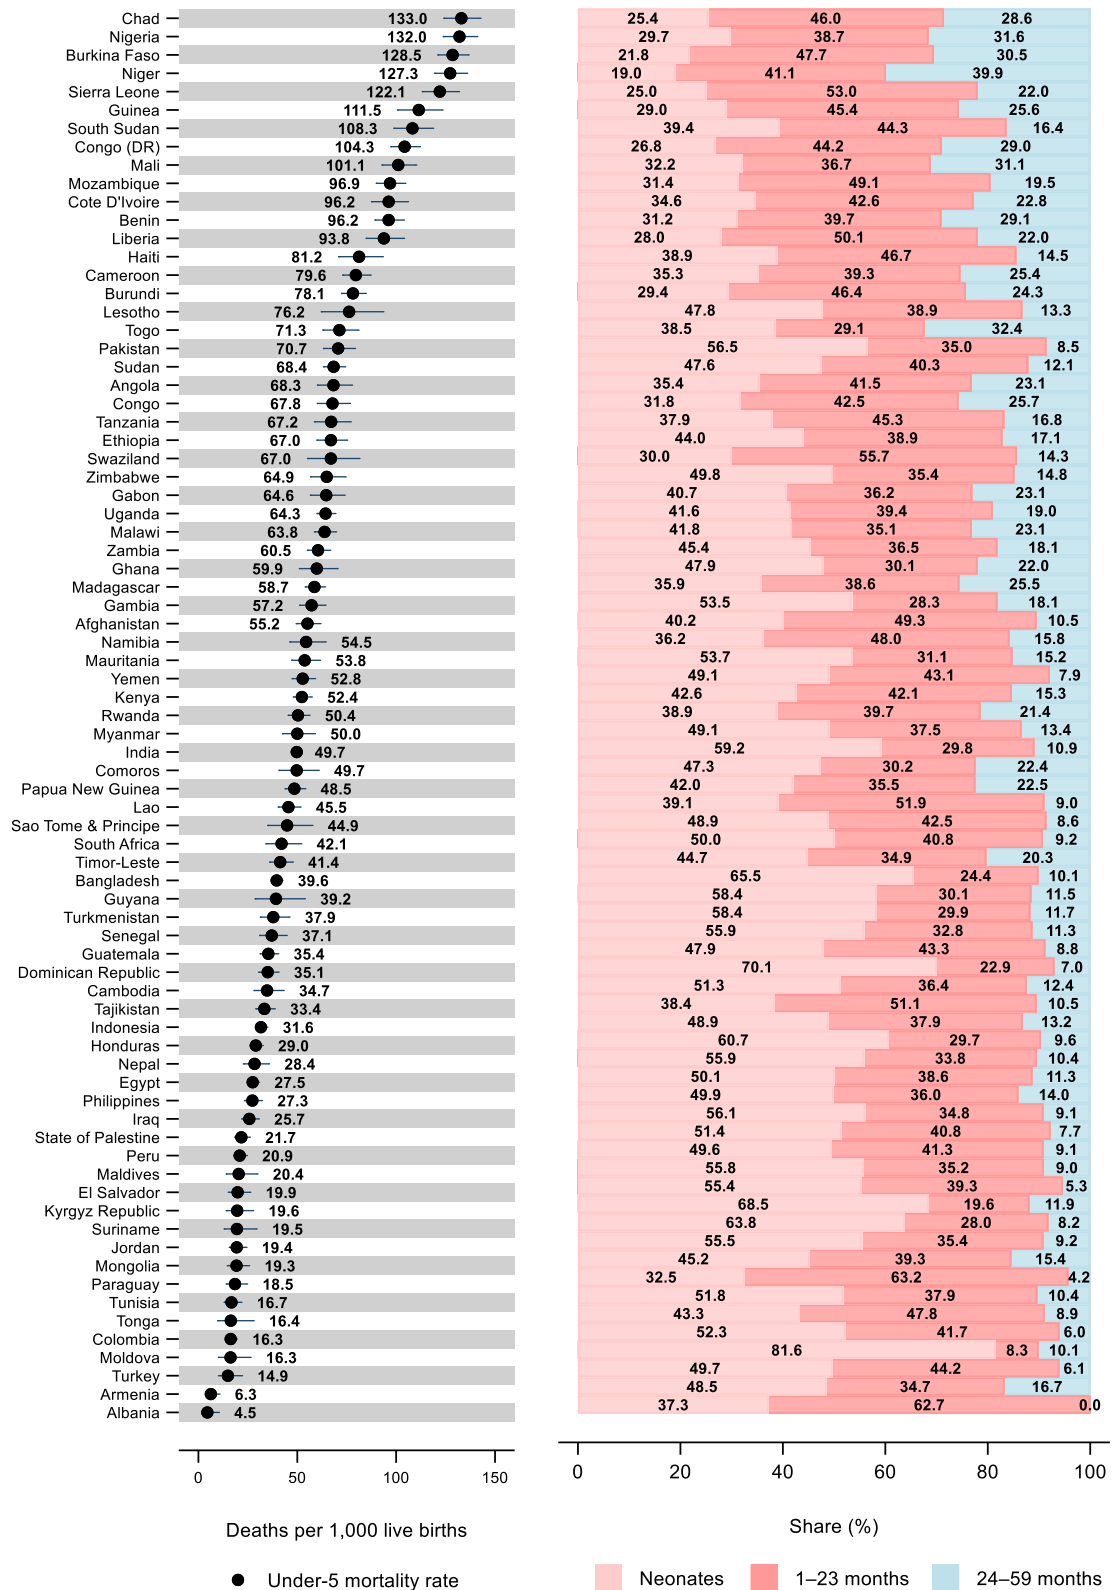

Notes: 95% confidence intervals are shown for mortality rates (some confidence intervals may be narrower than symbols). See eTable 2 in the Supplement for tabulated estimates and confidence intervals.

**eFigure 4.** Share of Deaths Among Children Younger Than 5 Years Occurring at Different Ages Using Detailed Age Intervals by Countries: Period Restricted to 5 Years Before Survey Instead of 10 Years

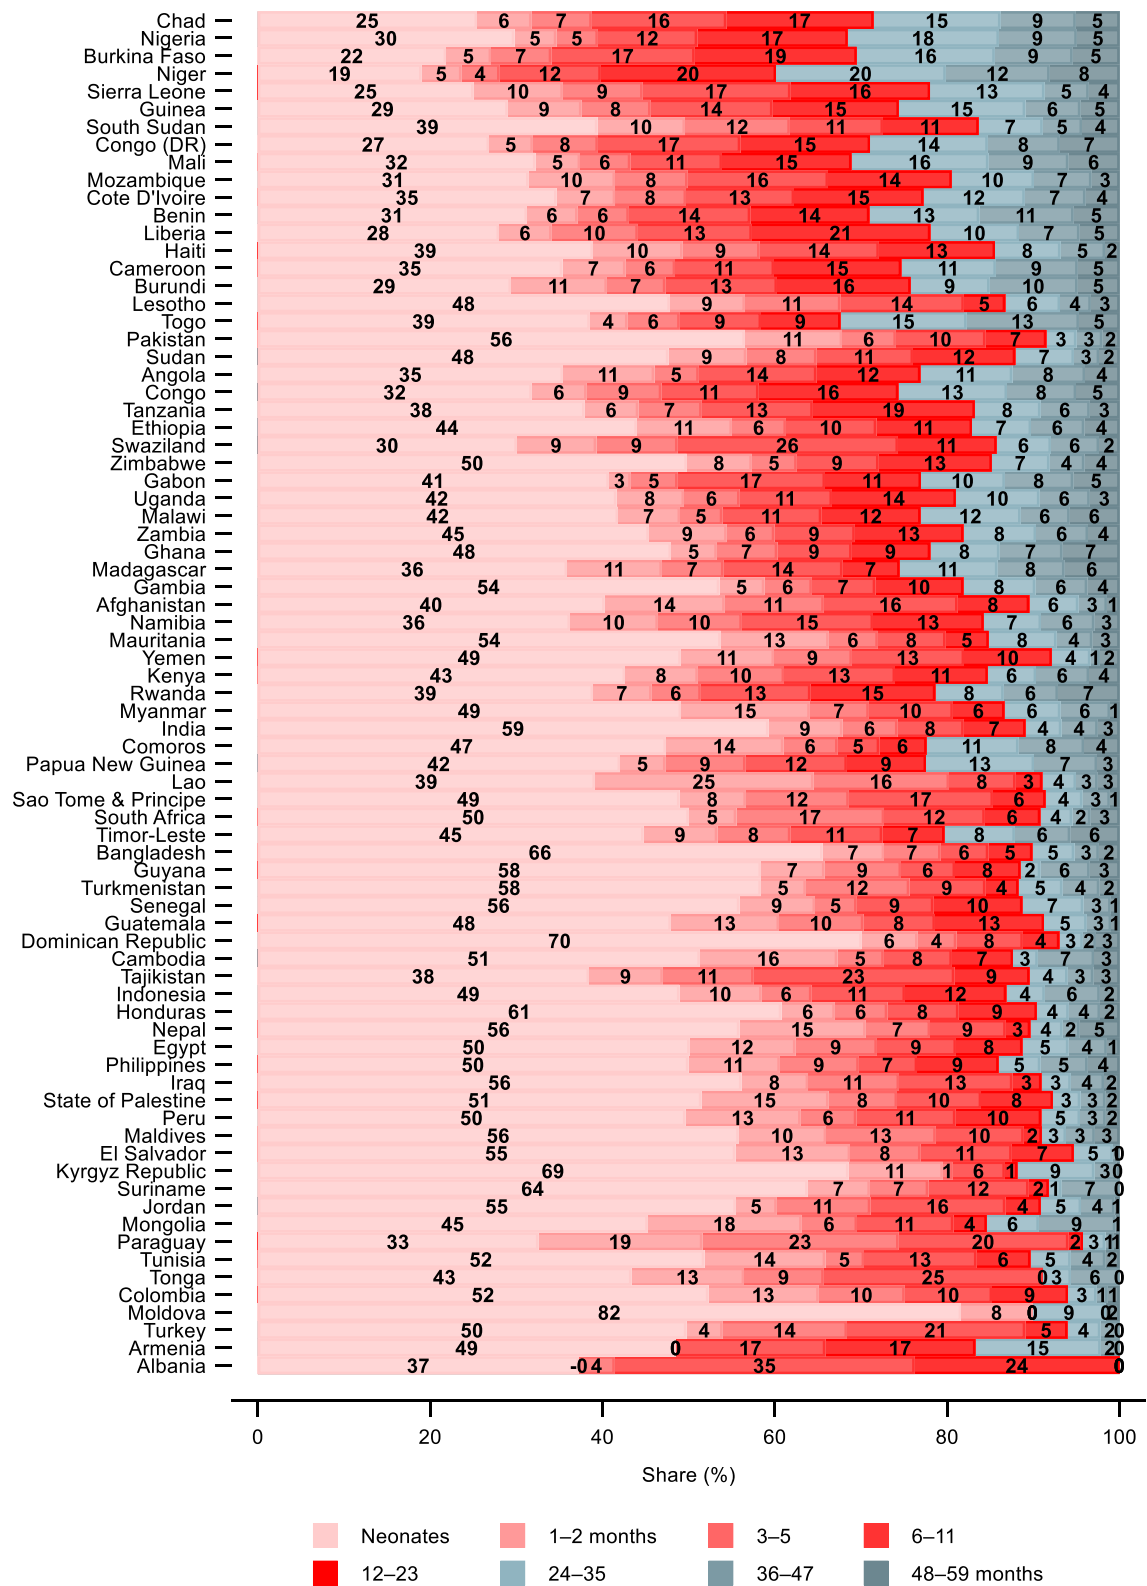

Notes: See eTable 3 in the Supplement for tabulated estimates and confidence intervals.

**eFigure 5.** Lexis Diagram Demonstrating Inclusion for Each Component Mortality Probability

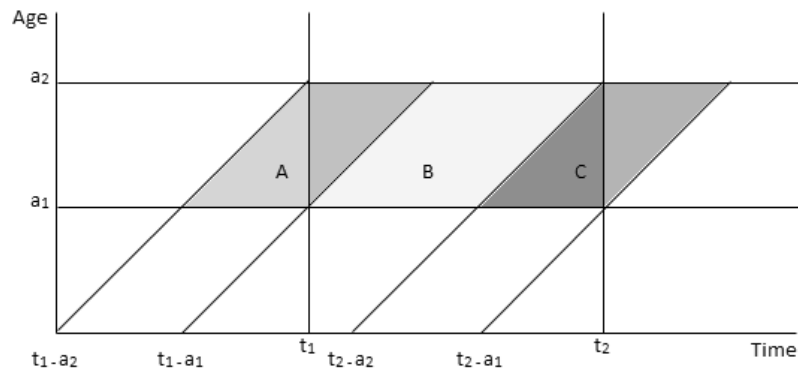

Source: Croft, Trevor N., Aileen MJ Marshall, and Courtney K. Allen. 2018. Guide to DHS Statistics DHS-7 (Version 2). Rockville, Maryland, USA: ICF.

**eFigure 6.** Country-Level Association Between Mortality Rate Among Children Younger Than 5 Years and Share of These Deaths Occurring at Different Ages

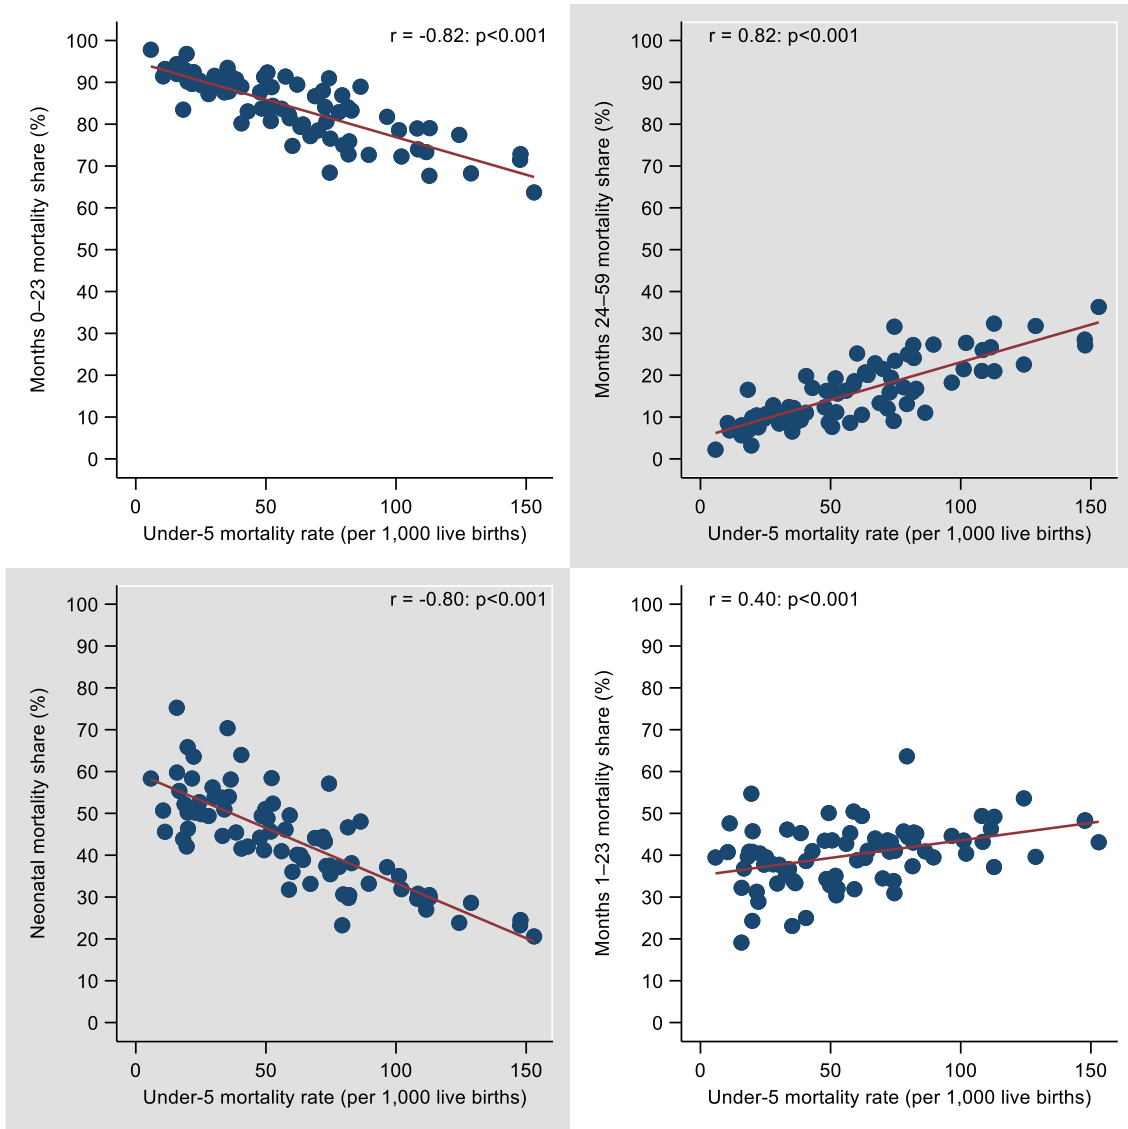

Notes: Pearson's correlation coefficients (r) are shown.

**eFigure 7.** Share of Deaths Among Children Younger Than 5 Years Occurring at Different Ages Using Detailed Age Intervals by Countries

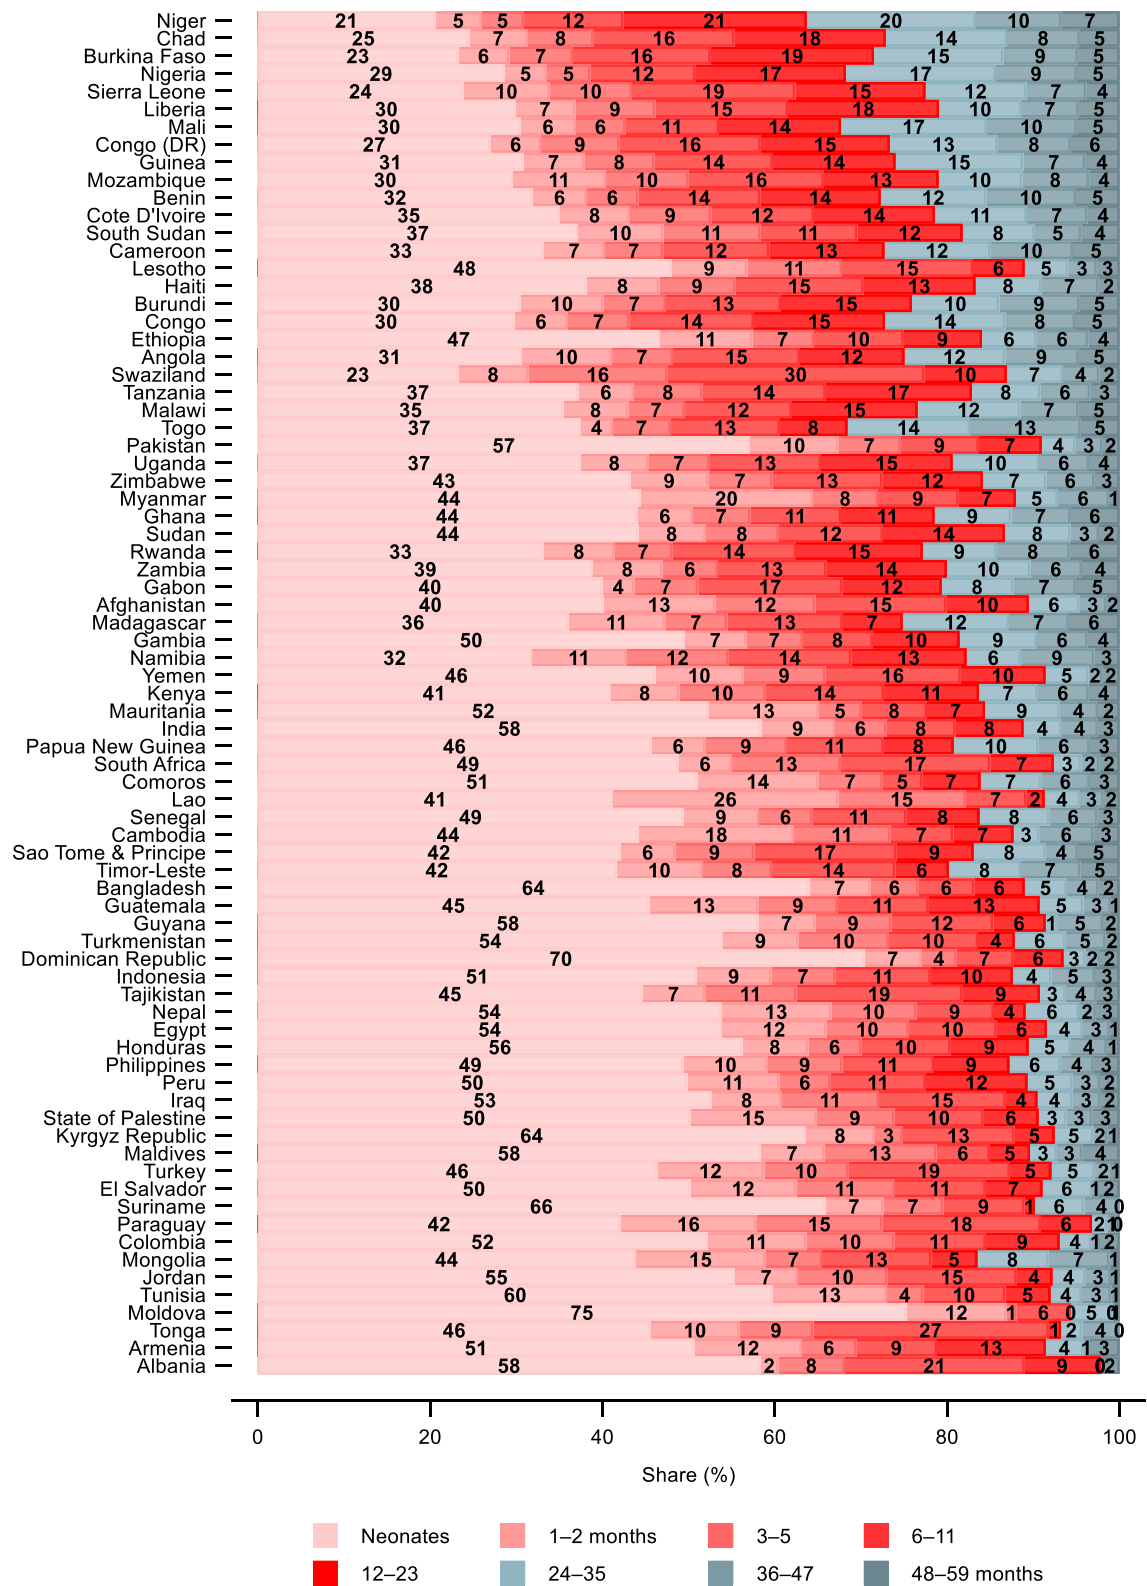

Notes: See eTable 6 in the Supplement for tabulated estimates and confidence intervals.

**eFigure 8.** Share of Deaths Among Children Younger Than 5 Years Occurring at Different Ages: Countries by Living Standards

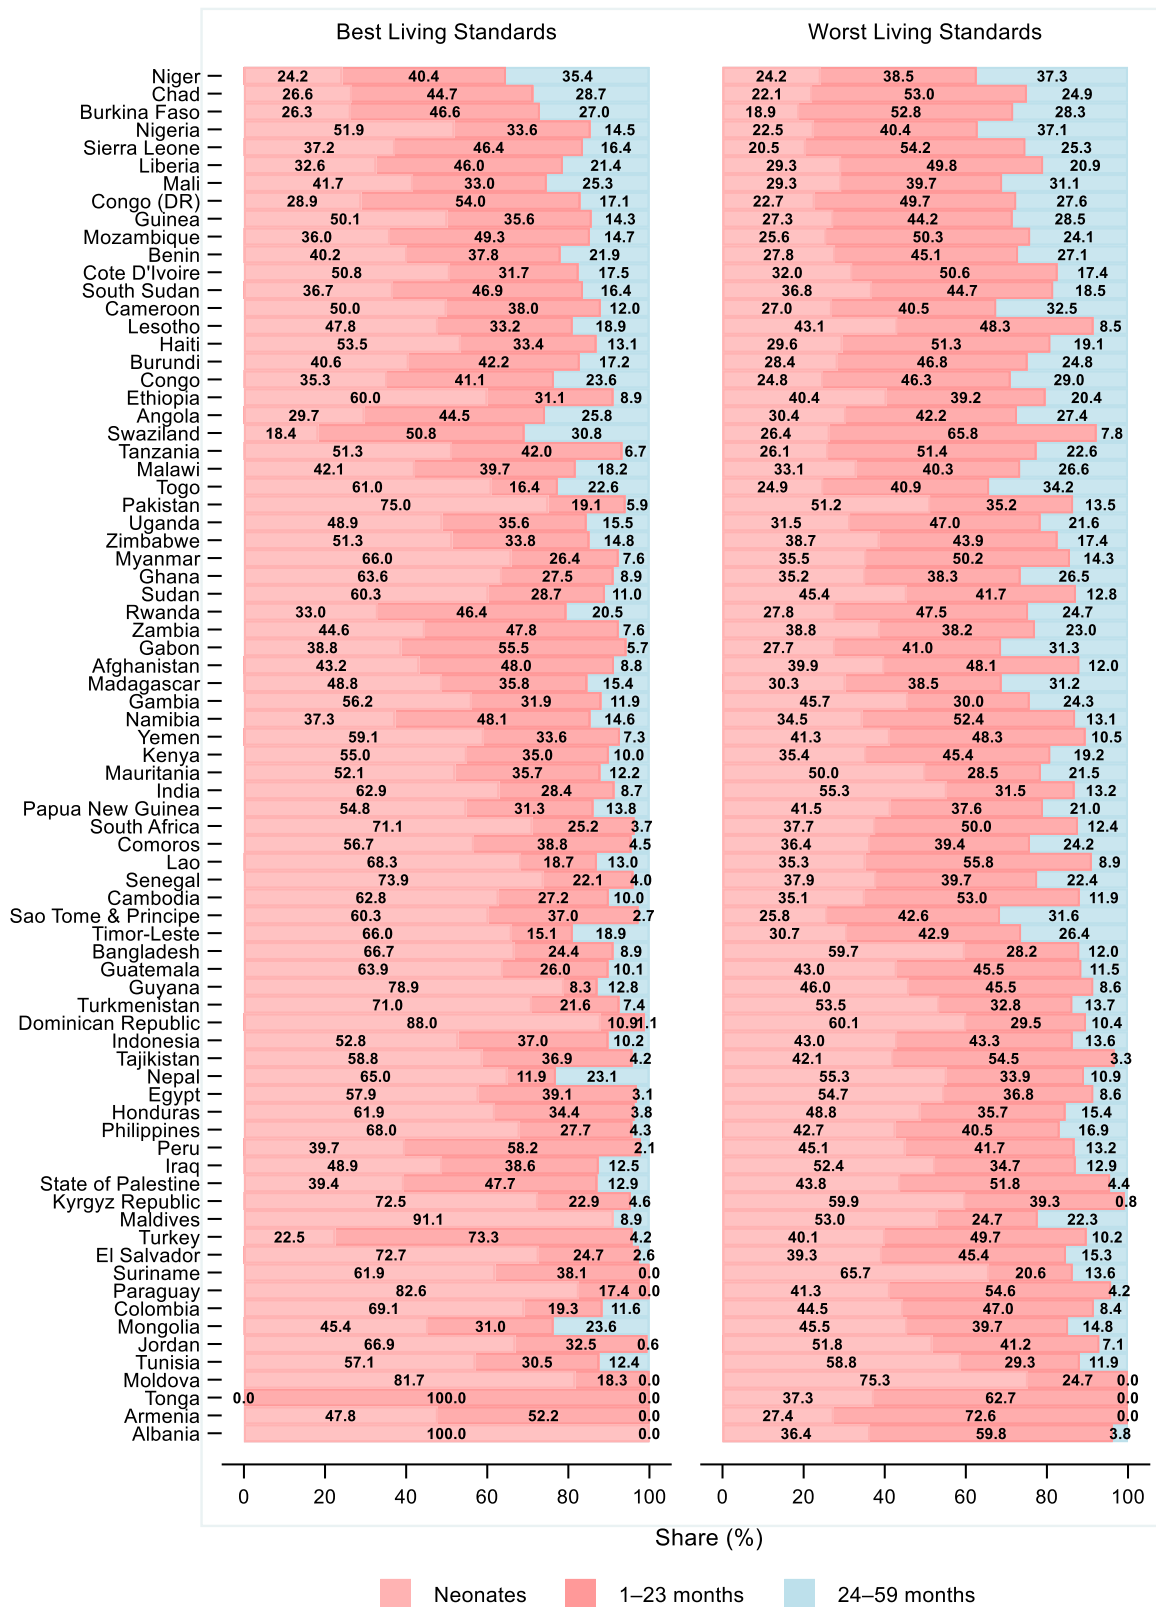

Notes: See eTable 8 in the Supplement for tabulated estimates and confidence intervals. 'Worst' refers to children in the 20% of households with the worst living standards and 'Best' refers to children in the 20% of households with the best living standards, within each country.



**eFigure 9.** Share of Deaths Among Children Younger Than 5 Years Occurring at Different Ages: Countries by Sex

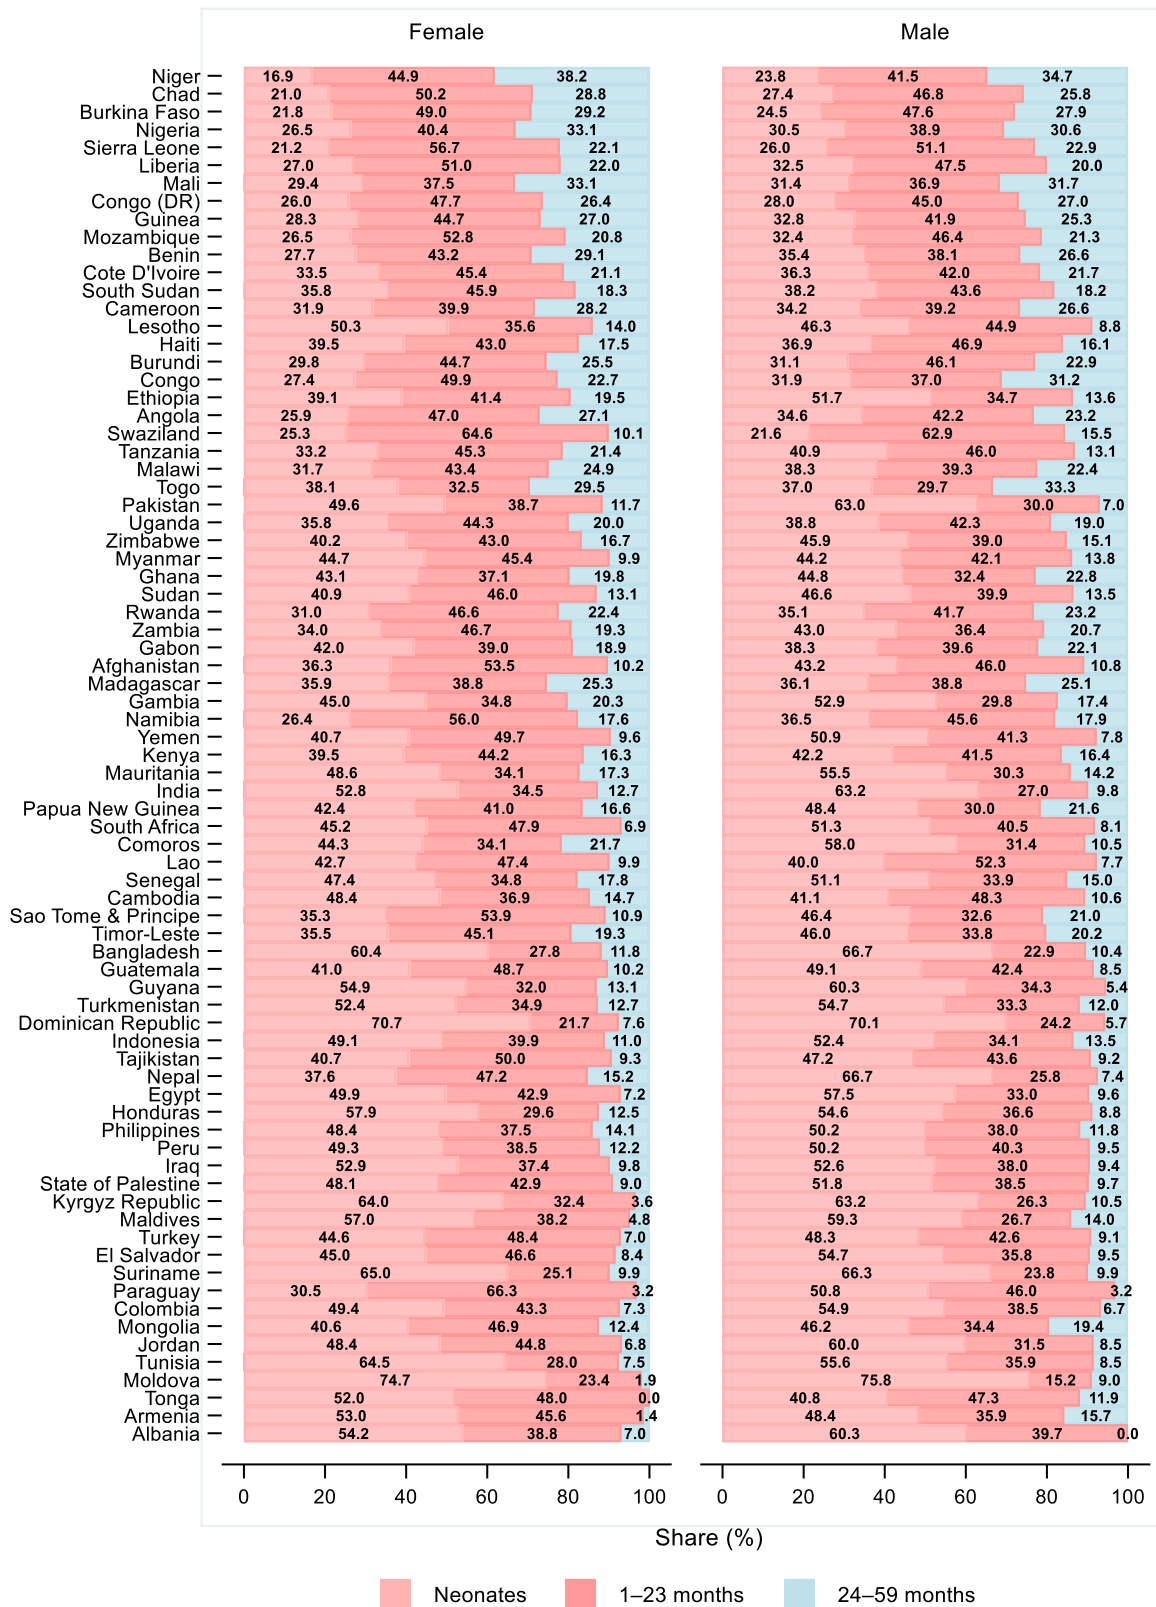

Notes: See eTable 10 in the Supplement for tabulated estimates and confidence intervals.

## eReferences

- 1 Croft T. DHS Data Editing and Imputation. DHS 1991. [https://dhsprogram.com/pubs/pdf/DHSG3/DHS\\_Data\\_Editing.pdf](https://dhsprogram.com/pubs/pdf/DHSG3/DHS_Data_Editing.pdf)
- 2 UN. Mortality estimates from major sample surveys: towards the design of a database for the monitoring of mortality levels and trends. United Nations, Department of Economic and Social Affairs, Population Division 2011. [https://www.un.org/en/development/desa/population/publications/pdf/technical/TP2011-2\\_MortEstMajorSampSurv.pdf](https://www.un.org/en/development/desa/population/publications/pdf/technical/TP2011-2_MortEstMajorSampSurv.pdf)
- 3 Rutstein S. Infant and child mortality: levels, trends, and demographic differentials. Revised edition. WFS Comparative Studies No. 43. In: *International Statistical Institute*. 1984.
- 4 Somoza JL. Illustrative Analysis, Infant and Child Mortality in Colombia. International Statistical Institute 1980.
- 5 Croft TN, Marshall AM, Allen CK, *et al*. Guide to DHS statistics. *Rockv Md USA ICF* 2018.
- 6 Mahy M. Childhood mortality in the developing world: A review of evidence for the Demographic and Health Surveys. Calverton, Maryland, USA: : ORC Macro 2003. <http://dhsprogram.com/pubs/pdf/CR4/CR4.pdf>
- 7 DHS. The DHS Program - Research Topics - Wealth Index. 2021. <http://www.dhsprogram.com/topics/wealth-index/Index.cfm> (accessed 5 May 2021).
